# Supplementary material
Source: PubMed Central journal article supplement (PMC6512006)
Supplement: ml9b00025_si_001.pdf [file ml9b00025_si_001.pdf]

## Supporting Information

### Identification of New Small-Molecule Inducers of Estrogen-Related Receptor $\alpha$ (ERR $\alpha$ ) Degradation

Lijie Peng,<sup>\*,†,#</sup> Zhensheng Zhang,<sup>†,#</sup> Chong Lei,<sup>†</sup> Shan Li,<sup>†</sup> Zhang Zhang,<sup>†</sup> Xiaomei Ren,<sup>†</sup> Yu Chang,<sup>†</sup> Yan Zhang,<sup>‡</sup> Yong Xu,<sup>‡</sup> and Ke Ding<sup>\*,†</sup>

<sup>†</sup> International Cooperative Laboratory of Traditional Chinese Medicine Modernization and Innovative Drug Development of Chinese Ministry of Education (MOE), Guangzhou City Key Laboratory of Precision Chemical Drug Development, School of Pharmacy, Jinan University, 601 Huangpu Avenue West, Guangzhou 510632, China

<sup>‡</sup> Guangzhou Institutes of Biomedicine and Health, Chinese Academy of Sciences, 190 Kaiyuan Avenue, Guangzhou 510530, China

#### Contents of SI

|                                                                    |     |
|--------------------------------------------------------------------|-----|
| 1. General information                                             | S2  |
| 2. Synthetic procedures and compound characterization              | S3  |
| 3. <i>In Vitro</i> TR-FRET Assay                                   | S47 |
| 4. Computational Study                                             | S48 |
| 5. Western Blot Analysis                                           | S49 |
| 6. The <sup>1</sup> H and <sup>13</sup> C NMR spectra of compounds | S54 |
| 7. HPLC Purity Analysis                                            | S83 |

## 1. General information

All reagents and solvents were obtained from commercial sources and were used without further treatment unless otherwise noted. Flash chromatography was performed using silica gel (200-300 mesh). All reactions were monitored by TLC, using silica gel plates with fluorescence F254 and UV light visualization.  $^1\text{H}$  and  $^{13}\text{C}$  NMR spectra were recorded on a Bruker AV-400 spectrometer at 400 MHz and 100MHz, respectively. Coupling constants ( $J$ ) are expressed in hertz (Hz). Chemical shifts ( $\delta$ ) of NMR are reported in parts per million (ppm) units relative to internal control (TMS). High resolution ESI-MS were recorded on an AB SCIEX X500r QTOF mass spectrometer. Purity of compounds was determined by reverse-phase high performance liquid chromatography (HPLC) analysis to be >95%. HPLC instrument: Dionex Summit HPLC (Column: Diamonsil C18, 5.0 $\mu\text{m}$ , 4.6 $\times$ 250 mm (Dikma Technologies); detector: PDA-100 photodiode array; inJector: ASI-100 autoinJector; pump: p-680A). A flow rate of 1.0 mL/min was used with mobile phase of MeOH in H<sub>2</sub>O.

## 2 Synthetic procedures and compound characterization

### 2.1 Procedure for preparing compound 4a-4f.

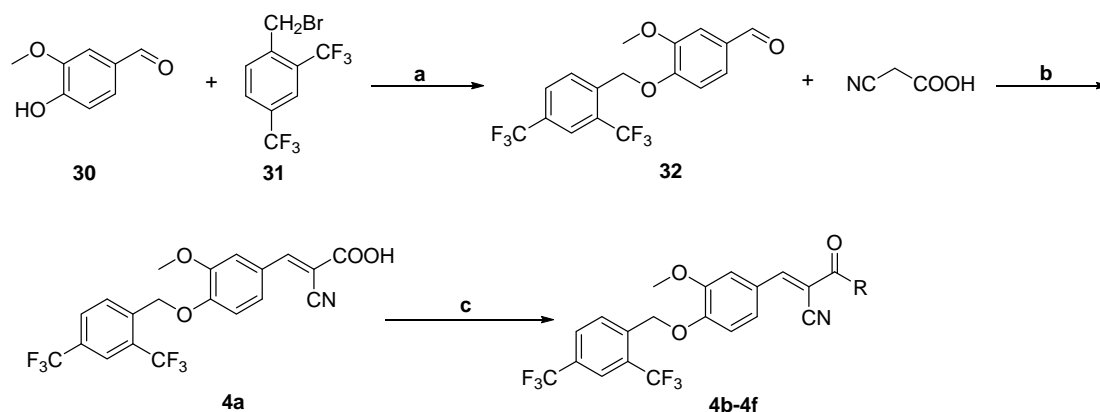

**Reagents and conditions:** (a) K<sub>2</sub>CO<sub>3</sub>, DMF, 80 °C, 5 h, 85%; (b) Piperidine, CH<sub>3</sub>CN, 80 °C, 5 h, 75%; (c) for **4b**: CH<sub>3</sub>I, K<sub>2</sub>CO<sub>3</sub>, DMF, rt, 1 h, 93%; for **4c**: oxalyl chloride, DMF, DCM, NH<sub>3</sub>·H<sub>2</sub>O, 3 h, 54.5%; for **4d**: 2-methoxyethan-1-amine, HATU, DIPEA, DMF, rt, 1 h, 81%; for **4e**: (1) tert-butyl 5-aminopentanoate, HATU, DIPEA, DMF, rt, 1 h, 68% ; (2) TFA, DCM, rt, 1 h, 93%; for **4f**: (1) tert-butyl 3-(2-aminoethoxy)propanoate, HATU, DIPEA, DMF, rt, 1 h, 66% ; (2) TFA, DCM, rt, 1 h, 86%.

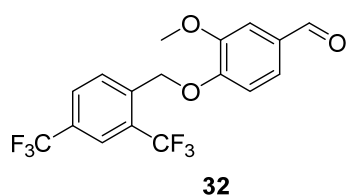

#### 4-((2, 4-bis(trifluoromethyl)benzyl)oxy)-3-methoxybenzaldehyde (32).

To a solution of 1-(bromomethyl)-2,4-bis(trifluoromethyl)benzene (3.07 g, 10 mmol, 1eq) in DMF (10 mL), Vanillin (1.52 g, 10 mmol, 1 eq) and K<sub>2</sub>CO<sub>3</sub> (1.9 g, 14 mmol, 1.4 eq) were added and stirred at 80 °C for 3 h. After cooling to room temperature, the resulting mixture was extracted with ethyl acetate and H<sub>2</sub>O. The organic layer was separated, washed with brine, dried with Na<sub>2</sub>SO<sub>4</sub>. After filtration and evaporation, the residue was purified by silica gel column chromatography (PE / EA = 7 : 1) to afford **32** as a white solid (3.21 g, 8.50 mmol, 85%): <sup>1</sup>H NMR (400 MHz, CDCl<sub>3</sub>) δ 9.87 (s,

1H), 7.97 (d,  $J = 8.4$  Hz, 2H), 7.85 (d,  $J = 8.5$  Hz, 1H), 7.48 (d,  $J = 1.7$  Hz, 1H), 7.42 (dd,  $J = 8.2, 1.8$  Hz, 1H), 6.93 (d,  $J = 8.2$  Hz, 1H), 5.47 (s, 2H), 3.99 (s, 3H).

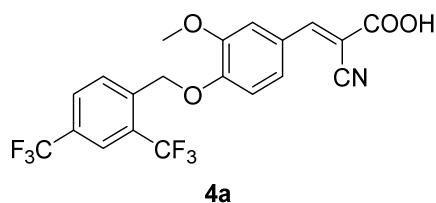

**(E)-3-(4-((2, 4-bis(trifluoromethyl)benzyl)oxy)-3-methoxyphenyl)-2-cyanoacrylic acid (4a).**

To a solution of compound **32** (2.9 g, 7.7 mmol, 1 eq) and 2-cyanoacetic acid (977.9 mg, 11.4 mmol, 1.5 eq) in acetonitrile (20 mL), piperidine (1.5 mL) was added and stirred at 80 °C for 3 h. After cooling to room temperature, the resulting mixture was treated with water. Then hydrochloric acid (2 N) was added to precipitate solid. The mixture was extracted with ethyl acetate and H<sub>2</sub>O. The organic layer was separated, washed with brine, dried with Na<sub>2</sub>SO<sub>4</sub>. After filtration and evaporation, the residue was purified by silica gel column chromatography (PE / EA = 1 : 1) to afford **4a** as a slightly yellow solid (2.6 g, 5.8 mmol, 75%): <sup>1</sup>H NMR (400 MHz, DMSO-*d*<sub>6</sub>) δ 13.79 (s, 1H), 8.27 (s, 1H), 8.18 (d,  $J = 8.1$  Hz, 1H), 8.11 (s, 1H), 8.02 (d,  $J = 8.1$  Hz, 1H), 7.81 (d,  $J = 2.0$  Hz, 1H), 7.70 (dd,  $J = 8.6, 1.9$  Hz, 1H), 7.26 (d,  $J = 8.6$  Hz, 1H), 5.46 (s, 2H), 3.83 (s, 3H). <sup>13</sup>C NMR (101 MHz, DMSO-*d*<sub>6</sub>) δ 164.13, 154.48, 151.73, 149.42, 139.74, 131.67, 130.45, 129.79(q,  $J = 33.33$ Hz), 128.16(q,  $J = 31.31$  Hz), 126.40, 125.59, 125.17, 123.66, 122.44, 117.18, 113.85, 101.12, 66.68, 56.14. HRMS (ESI<sup>+</sup>): calculated for C<sub>20</sub>H<sub>13</sub>F<sub>6</sub>N<sub>2</sub>NaO<sub>3</sub> [M + Na]<sup>+</sup>: 468.0636, found 468.0641. HPLC analysis: MeOH : H<sub>2</sub>O : TFA (90 : 10 : 0.01), 5.70 min, 98.94% purity.

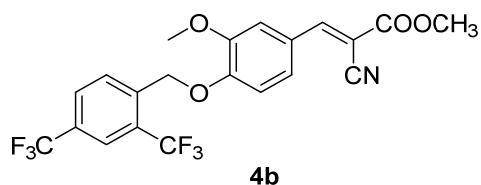

**Methyl (E)-3-(4-((2, 4-bis(trifluoromethyl)benzyl)oxy)-3-methoxyphenyl)-2-cyanoacrylate (4b).**

**4a** (200 mg, 0.44 mmol, 1 eq) was dissolved in 3 mL anhydrous DMF. K<sub>2</sub>CO<sub>3</sub> (121.6 mg, 0.88 mmol, 2 eq) and CH<sub>3</sub>I (41 μL, 0.66 mmol, 1.5 eq) were added into reaction.

After being stirred for 1 h, the resulting mixture was extracted with ethyl acetate and saturated NaHCO<sub>3</sub>. The organic layer was separated, washed with brine, dried with Na<sub>2</sub>SO<sub>4</sub>. After filtration and evaporation, the residue was purified by silica gel column chromatography (PE : EA =2 : 1) to give **4b** as a white solid (188 mg, 0.41 mmol, 93% yield): <sup>1</sup>H NMR (400 MHz, DMSO-*d*<sub>6</sub>) δ 8.35 (s, 1H), 8.18 (d, *J* = 7.7 Hz, 1H), 8.12 (s, 1H), 8.02 (d, *J* = 7.8 Hz, 1H), 7.84 (s, 1H), 7.75 (d, *J* = 8.2 Hz, 1H), 7.28 (d, *J* = 8.4 Hz, 1H), 5.47 (s, 2H), 3.84 (d, *J* = 6.5 Hz, 6H). <sup>13</sup>C NMR (101 MHz, DMSO-*d*<sub>6</sub>) δ 163.26, 155.26, 152.09, 149.43, 139.67, 131.72, 130.47, 129.32, 128.03, 126.81, 125.40, 123.70, 122.41, 116.73, 114.02, 113.88, 99.46, 66.69, 56.17, 53.68. HRMS (ESI<sup>+</sup>): calculated for C<sub>21</sub>H<sub>15</sub>F<sub>6</sub>NNaO<sub>4</sub> [M + Na]<sup>+</sup>: 482.0797, found 482.0782. HPLC analysis: MeOH : H<sub>2</sub>O (80 : 20), 23.45 min, 100% purity.

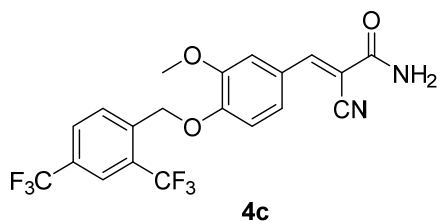

**(*E*)-3-(4-((2,4-bis(trifluoromethyl)benzyl)oxy)-3-methoxyphenyl)-2-cyanoacrylamide (**4c**).**

Oxalyl chloride (0.5 mL) and a drop of DMF was added to a solution of **4a** (100 mg, 0.22 mmol, 1 eq) in DCM (2 mL). The solution was concentrated in vacuo and the crude product is used without further purification after being stirred for 5 h at room temperature. The crude product obtained above was dissolved in CH<sub>2</sub>Cl<sub>2</sub> (2 mL) and 28% ammonia solution (1 mL) was added at 0 °C. After being stirred at room temperature for 2 hours, the mixture was extracted with DCM and H<sub>2</sub>O. The organic layer was separated, washed with brine, dried with Na<sub>2</sub>SO<sub>4</sub>. After filtration and evaporation, the residue was purified by silica gel column chromatography (PE / EA = 3 : 1) to afford the product (**4c**) (55 mg, 0.12 mmol, 55% yield) as white solid: <sup>1</sup>H NMR (400 MHz, DMSO-*d*<sub>6</sub>) δ 8.18 (d, *J* = 8.2 Hz, 1H), 8.12 (d, *J* = 7.4 Hz, 2H), 8.03 (d, *J* = 8.1 Hz, 1H), 7.88 – 7.64 (m, 3H), 7.57 (dd, *J* = 8.5, 1.9 Hz, 1H), 7.24 (d, *J* = 8.5 Hz, 1H), 5.44 (s, 2H), 3.84 (s, 3H). <sup>13</sup>C NMR (101 MHz, DMSO-*d*<sub>6</sub>) δ 163.41, 151.05, 150.87, 149.43, 139.86, 131.63, 130.42, 129.76 (q, *J* = 32.32Hz), 128.12 (q, *J*

= 31.31Hz), 125.95, 125.53, 125.13, 123.65, 122.46, 117.54, 113.92, 113.28, 104.11, 66.62, 56.11. HRMS (ESI<sup>+</sup>): calculated for C<sub>20</sub>H<sub>15</sub>F<sub>6</sub>N<sub>2</sub>O<sub>3</sub> [M + H]<sup>+</sup>: 445.0981, found 445.0973. HPLC analysis: MeOH : H<sub>2</sub>O (80 : 20), 11.20 min, 96.20% purity.

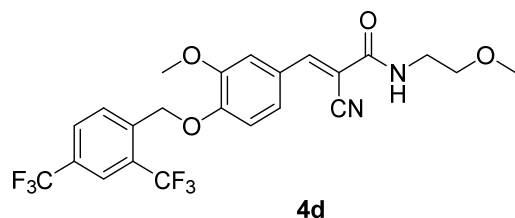

**(E)-3-(4-((2, 4-bis(trifluoromethyl)benzyl)oxy)-3-methoxyphenyl)-2-cyano-N-(2-methoxyethyl) acrylamide (4d).**

2-methoxyethan-1-amine (39.8 mg, 0.53 mmol, 1.2 eq), HATU (216.7 mg, 0.57 mmol, 1.3 eq) and DIPEA (0.22 ml, 1.3 mmol, 3 eq) was added to a solution of Carboxylic acid **4a** (200 mg, 0.44 mmol, 1 eq) in dry DMF (3 mL). After being stirred for 1 h at RT, the resulting mixture was extracted with ethyl acetate and saturated NaHCO<sub>3</sub>. The organic layer was separated, washed with brine, dried with Na<sub>2</sub>SO<sub>4</sub>. After filtration and evaporation, the residue was purified by silica gel column chromatography (PE / EA = 3 : 1) to give **4d** (183 mg, 0.36 mmol, 82% yield) as white solid: <sup>1</sup>H NMR (400 MHz, DMSO-*d*<sub>6</sub>) δ 8.36 (s, 1H), 8.18 (d, *J* = 7.9 Hz, 1H), 8.12 (d, *J* = 6.2 Hz, 2H), 8.03 (d, *J* = 8.1 Hz, 1H), 7.72 (s, 1H), 7.59 (d, *J* = 8.4 Hz, 1H), 7.24 (d, *J* = 8.4 Hz, 1H), 5.44 (s, 2H), 3.84 (s, 3H), 3.43 (d, *J* = 4.6 Hz, 2H), 3.38 (d, *J* = 5.2 Hz, 2H), 3.27 (s, 3H). <sup>13</sup>C NMR (101 MHz, DMSO-*d*<sub>6</sub>) δ 161.73, 151.06, 150.83, 149.42, 139.86, 131.62, 130.41, 129.74 (q, *J* = 36.36 Hz), 128.11 (q, *J* = 32.32 Hz), 125.94, 125.44, 125.18, 123.63, 122.45, 117.42, 113.91, 113.40, 103.73, 70.59, 66.61, 58.37, 56.12. HRMS (ESI<sup>+</sup>): calculated for C<sub>23</sub>H<sub>21</sub>F<sub>6</sub>N<sub>2</sub>O<sub>4</sub> [M + H]<sup>+</sup>: 503.1400, found 503.1383. HPLC analysis: MeOH : H<sub>2</sub>O (80 : 20), 15.19 min, 100% purity.

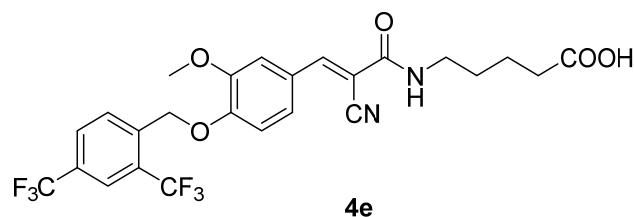

**(E)-5-(3-(4-((2, 4-bis(trifluoromethyl)benzyl)oxy)-3-methoxyphenyl)-2-cyanoacrylamido) pentanoic acid (4e).**

Tert-butyl 5-aminopentanoate (91.8 mg, 0.53 mmol, 1.2 eq), HATU (216.7 mg, 0.57 mmol, 1.3 eq) and DIPEA (0.22 ml, 1.3 mmol, 3 eq) was added to a solution of Carboxylic acid **4a** (200 mg, 0.44 mmol, 1 eq) in dry DMF (3 mL). After being stirred for 1 h at RT, the resulting mixture was extracted with ethyl acetate and saturated NaHCO<sub>3</sub>. The organic layer was separated, washed with brine, dried with Na<sub>2</sub>SO<sub>4</sub>. After filtration and evaporation, the residue was purified by silica gel column chromatography (PE / EA = 2 : 1) to give tert-butyl ester intermediate (178 mg, 0.30 mmol, 68% yield) as yellow solid. TFA (1 mL) was added to a solution of tert-butyl ester intermediate above in DCM (2 mL). After being stirred for 1 h, the solvents were removed in vacuo, and residual TFA was removed by the addition and evaporation of toluene (3 x 3mL) to give **4e** (155 mg, 0.28 mmol, 93%) as yellow solid: <sup>1</sup>H NMR (400 MHz, DMSO-*d*<sub>6</sub>) δ 12.01 (s, 1H), 8.38 (t, *J* = 5.7 Hz, 1H), 8.19 (d, *J* = 8.2 Hz, 1H), 8.12 (d, *J* = 3.9 Hz, 2H), 8.04 (d, *J* = 8.1 Hz, 1H), 7.72 (d, *J* = 2.0 Hz, 1H), 7.59 (dd, *J* = 8.6, 2.0 Hz, 1H), 7.25 (d, *J* = 8.6 Hz, 1H), 5.45 (s, 2H), 3.84 (s, 3H), 3.22 (d, *J* = 5.7 Hz, 2H), 2.25 (t, *J* = 6.8 Hz, 2H), 1.56–1.50 (m, 4H). <sup>13</sup>C NMR (101 MHz, DMSO-*d*<sub>6</sub>) δ 174.85, 161.54, 150.99, 150.62, 149.42, 139.87, 130.41, 129.76 (q, *J* = 33.33 Hz), 128.11 (q, *J* = 32.32 Hz), 126.00, 125.35, 125.18, 125.13, 123.62, 122.44, 117.45, 113.91, 113.39, 103.97, 79.44 (t, *J* = 33.33 Hz), 66.63, 56.13, 33.74, 28.88, 22.35. HRMS (ESI<sup>+</sup>): calculated for C<sub>25</sub>H<sub>23</sub>F<sub>6</sub>N<sub>2</sub>O<sub>5</sub> [M + H]<sup>+</sup>: 545.1506, found 545.1495. HPLC analysis: MeOH : H<sub>2</sub>O : TFA (80 : 20 : 0.02), 7.67 min, 96.85% purity.

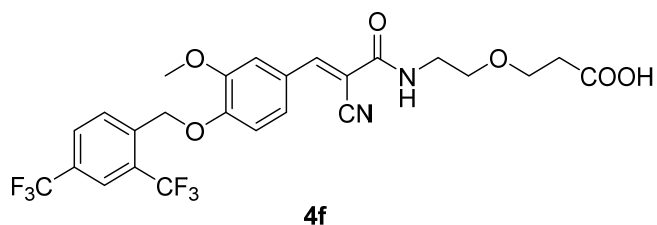

**(*E*)-3-(2-(3-(4-((2, 4-bis(trifluoromethyl)benzyl)oxy)-3-methoxyphenyl)-2-cyanoacrylamido)ethoxy)propanoic acid (**4f**).**

Tert-butyl 3-(2-aminoethoxy)propanoate (100.3 mg, 0.53 mmol, 1.2 eq), HATU (216.7 mg, 0.57 mmol, 1.3 eq) and DIPEA (0.22 mL, 1.3 mmol, 3 eq) was added to a solution of Carboxylic acid **4a** (200 mg, 0.44 mmol, 1 eq) in dry DMF (3 mL). After

being stirred for 1 h at RT, the resulting mixture was extracted with ethyl acetate and saturated NaHCO<sub>3</sub>. The organic layer was separated, washed with brine, dried with Na<sub>2</sub>SO<sub>4</sub>. After filtration and evaporation, the residue was purified by silica gel column chromatography (PE / EA = 2 : 1) to give tert-butyl ester intermediate (178 mg, 0.29 mmol, 66% yield) as yellow solid. TFA (1 mL) was added to a solution of tert-butyl ester intermediate above in DCM (2 mL). After being stirred for 1 h, the solvents were removed in vacuo, and residual TFA was removed by the addition and evaporation of toluene (3 x 3mL) to give **4f** (140 mg, 0.25 mmol, 86%) as yellow solid: <sup>1</sup>H NMR (400 MHz, DMSO-*d*<sub>6</sub>) δ 12.18 (s, 1H), 8.35 (s, 1H), 8.19 (s, 1H), 8.13 (s, 2H), 8.04 (s, 1H), 7.73 (s, 1H), 7.59 (s, 1H), 7.25 (s, 1H), 5.46 (s, 2H), 3.85 (s, 3H), 3.63 (d, *J* = 6.0 Hz, 2H), 3.49 (s, 2H), 3.37 (s, 4H). <sup>13</sup>C NMR (101 MHz, DMSO-*d*<sub>6</sub>) δ 173.09, 161.76, 151.07, 150.84, 149.42, 139.87, 131.64, 130.47, 129.96, 128.28, 125.95, 125.47, 123.66, 117.40, 113.92, 113.40, 103.72, 68.76, 67.01, 66.42, 56.13, 35.13. HRMS (ESI<sup>+</sup>): calculated for Chemical Formula: C<sub>25</sub>H<sub>23</sub>F<sub>6</sub>N<sub>2</sub>O<sub>6</sub> [M + H]<sup>+</sup>: 561.1455, found 561.1444. HPLC analysis: MeOH : H<sub>2</sub>O : TFA (80 : 20 : 0.02), 11.91 min, 97.96% purity.

## 2.2 General Procedure for Preparing Linker

### A) Synthesis of Linker (10a-10b, 10d) :

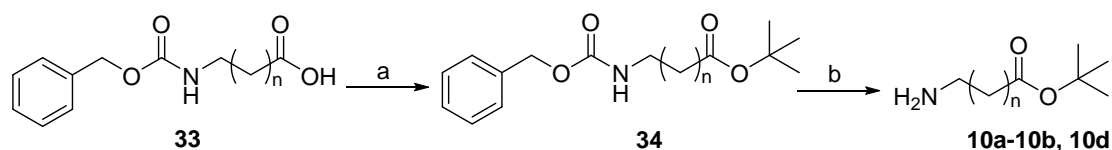

Reaction conditions: (a) tert-Butanol, DCC, DMAP, DCM, rt; (b) Pd/C, H<sub>2</sub>, EtOH, 40 °C.

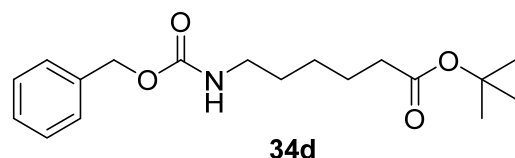

**Tert-butyl 6-(((benzyloxy)carbonyl)amino)hexanoate(34d). General procedure for syntheses of 34a-34b.**

6-(((benzyloxy)carbonyl)amino)hexanoic acid (1.0 g , 3.8 mmol, 1 eq), DMAP (92.8



mg, 0.76 mmol, 0.2 eq) and DCC (862.5 mg, 4.2 mmol, 1.1 eq) were added to a solution of tert-butanol (0.73 ml, 7.6 mmol, 2.0 eq) in DCM (5 mL) and stirred at room temperature for 3 h. The mixture was evaporated to obtain the residue. The residue was purified by flash chromatography (PE / EA = 6 : 1) to afford **34d** (1.1 g, 3.4 mmol, 89% yield) as colorless oil:  $^1\text{H NMR}$  (400 MHz,  $\text{CDCl}_3$ )  $\delta$  7.33 (dd,  $J = 15.1, 11.0$  Hz, 5H), 5.09 (s, 2H), 4.77 (s, 1H), 3.19 (dd,  $J = 13.1, 6.6$  Hz, 2H), 2.20 (t,  $J = 7.4$  Hz, 2H), 1.58 (dd,  $J = 15.4, 7.6$  Hz, 2H), 1.50 (dd,  $J = 14.7, 7.3$  Hz, 2H), 1.43 (d,  $J = 3.8$  Hz, 9H), 1.34 (dd,  $J = 15.2, 8.2$  Hz, 2H).

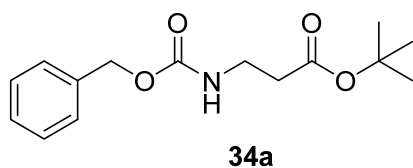

**Tert-butyl 3-(((benzyloxy)carbonyl)amino)propanoate (34a).**

Yield: 76%.  $^1\text{H NMR}$  (400 MHz,  $\text{CDCl}_3$ )  $\delta$  7.40–7.28 (m, 5H), 5.29 (s, 1H), 5.09 (s, 2H), 3.42 (dd,  $J = 12.1, 6.1$  Hz, 2H), 2.45 (t,  $J = 6.0$  Hz, 2H), 1.44 (s, 9H).

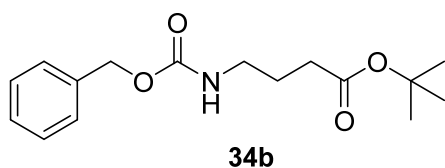

**Tert-butyl 4-(((benzyloxy)carbonyl)amino)butanoate (34b).**

Yield: 83%.  $^1\text{H NMR}$  (400 MHz,  $\text{CDCl}_3$ )  $\delta$  7.42–7.27 (m, 5H), 5.09 (s, 2H), 4.90 (s, 1H), 3.23 (dd,  $J = 13.0, 6.6$  Hz, 2H), 2.26 (t,  $J = 7.2$  Hz, 2H), 1.84–1.73 (m, 2H), 1.43 (s, 9H).

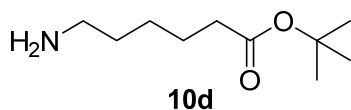

**Tert-butyl 6-aminohexanoate (10d). General procedure for syntheses of 10a, 10b.**

10% palladium on carbon catalyst (90 mg) was added to a solution of the ester **34d** (730 mg, 2.3 mmol, 1 eq) in ethanol (6 mL). The mixture were stirred under an atmosphere of hydrogen for 24 h at 45 °C. The reaction mixture was filtered through a pad of Celite, washed with ethyl acetate and the filtrate was evaporated to obtain **10d** (201 mg, 1.1 mmol, 48% yield) as colorless oil:  $^1\text{H NMR}$  (400 MHz,  $\text{CDCl}_3$ )  $\delta$  2.68 (t,

$J = 7.0$  Hz, 2H), 2.20 (t,  $J = 7.5$  Hz, 2H), 1.59 (dd,  $J = 15.1, 7.5$  Hz, 2H), 1.47–1.42 (m, 11H), 1.37 – 1.30 (m, 2H).

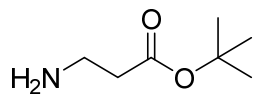

**10a**

**Tert-butyl 3-aminopropanoate (10a).**

Yield: 55%.  $^1\text{H NMR}$  (400 MHz,  $\text{CDCl}_3$ )  $\delta$  2.92(t,  $J = 6.2$  Hz, 2H), 2.36 (t,  $J = 6.2$  Hz, 2H), 1.44 (s, 9H).

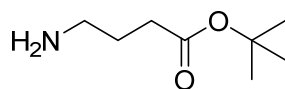

**10b**

**Tert-butyl 4-aminobutanoate (10b).**

Yield: 47%.  $^1\text{H NMR}$  (400 MHz,  $\text{CDCl}_3$ )  $\delta$  2.70 (t,  $J = 7.1$  Hz, 2H), 2.25 (t,  $J = 7.4$  Hz, 2H), 1.76–1.67 (m, 2H), 1.43 (s, 9H).

**B) Synthesis of Linker (10h-10j):**

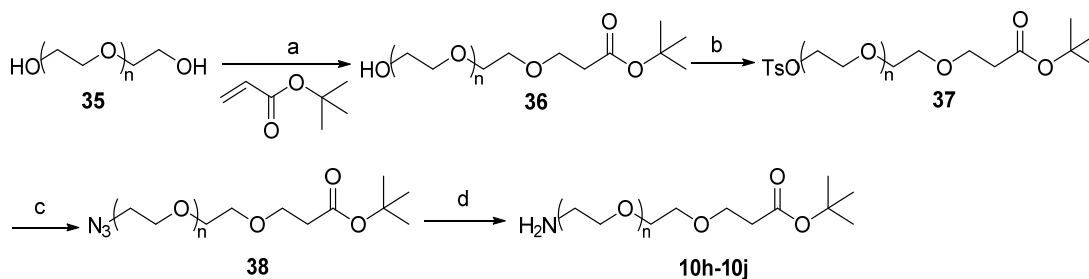

**Reaction conditions:** (a) Na, THF, rt; (b) TsCl, DMAP, TEA, DCM, rt; (c)  $\text{NaN}_3$ , DMF,  $100^\circ\text{C}$ , 2h; (d)  $\text{PPh}_3$ ,  $\text{H}_2\text{O}$ , THF, rt.

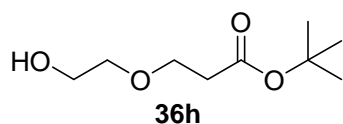

**36h**

**Tert-butyl 3-(2-hydroxyethoxy)propanoate (36h). General procedure for syntheses of 36i, 36j.**

To a solution of anhydrous ethylene glycol (10 g, 161.1 mmol, 3 eq) in dry THF (40 mL), Sodium metal (62.0 mg, 2.70 mmol, 0.05 eq) was added and stirred at RT for 2 h. Tert-butyl acrylate (6.90 g, 53.7 mmol, 1 eq) was added and allowed to stir for 10 h.

The resulting mixture was concentrated in vacuo, and extracted with ethyl acetate and H<sub>2</sub>O. The organic layer was separated, washed with brine, dried with Na<sub>2</sub>SO<sub>4</sub>. After filtration and evaporation, the residue was purified by silica gel column chromatography (PE / EA = 2 : 1) to obtain **36h** (5.0 g, 26.3 mmol, 49% yield) as colorless oil: <sup>1</sup>H NMR (400 MHz, CDCl<sub>3</sub>) δ 3.77 – 3.67 (m, 4H), 3.61-3.53 (m, 2H), 2.54-2.43 (m, 3H), 1.45 (s, 9H).

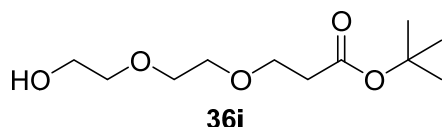

**Tert-butyl 3-(2-(2-hydroxyethoxy)ethoxy)propanoate (36i).**

Yield: 51%. <sup>1</sup>H NMR (400 MHz, CDCl<sub>3</sub>) δ 3.72 (dd, *J* = 8.4, 4.4 Hz, 4H), 3.67 – 3.57 (m, 6H), 2.58 (s, 1H), 2.50 (t, *J* = 6.4 Hz, 2H), 1.44 (s, 9H).

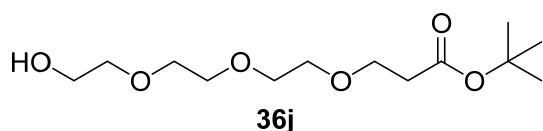

**Tert-butyl 3-(2-(2-(2-hydroxyethoxy)ethoxy)ethoxy)propanoate (36j).**

Yield: 46%. <sup>1</sup>H NMR (400 MHz, CDCl<sub>3</sub>) δ 3.70 (t, *J* = 6.5 Hz, 4H), 3.67–3.57 (m, 10H), 2.82 (s, 1H), 2.50 (t, *J* = 6.5 Hz, 2H), 1.43 (s, 9H).

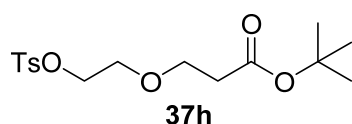

**Tert-butyl 3-(2-(tosyloxy)ethoxy)propanoate (37h). General procedure for syntheses of 37i, 37j.**

A solution of tosyl chloride (3.23 g, 17 mmol, 1.3 eq) in dry CH<sub>2</sub>Cl<sub>2</sub> (5 mL) was added dropwise to a solution of **36h** (2.5 g, 13.1 mmol, 1 eq), NEt<sub>3</sub> (2.4 mL, 17 mmol, 1.3 eq) and DMAP (402.8 mg, 3.3 mmol, 0.25 eq) in dry CH<sub>2</sub>Cl<sub>2</sub> (5 mL) at -10 °C. The reaction mixture was stirred for 8 hours at room temperature. The resulting mixture was treated with saturated NaHCO<sub>3</sub> and the aqueous phase was extracted with CH<sub>2</sub>Cl<sub>2</sub>. The organic layer was separated, washed with brine, dried with Na<sub>2</sub>SO<sub>4</sub>. After filtration and evaporation, the residue was purified by silica gel column chromatography (PE / EA = 7 : 1) to obtain **37h** (3.9 g, 11.3 mmol, 86%) as colorless

oil:  $^1\text{H}$  NMR (400 MHz,  $\text{CDCl}_3$ )  $\delta$  7.81 (d,  $J = 8.3$  Hz, 2H), 7.36 (d,  $J = 8.0$  Hz, 2H), 4.15 (dd,  $J = 5.4, 4.2$  Hz, 2H), 3.65 (dd,  $J = 8.1, 4.3$  Hz, 4H), 2.46 (s, 3H), 2.43 (t,  $J = 6.4$  Hz, 2H), 1.45 (s, 9H).

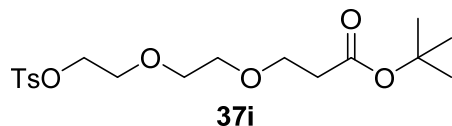

**Tert-butyl 3-(2-(2-(tosyloxy)ethoxy)ethoxy)propanoate (37i).**

Yield: 74%.  $^1\text{H}$  NMR (400 MHz,  $\text{CDCl}_3$ )  $\delta$  7.78 (d,  $J = 8.3$  Hz, 2H), 7.33 (d,  $J = 8.1$  Hz, 2H), 4.16 – 4.12 (m, 2H), 3.69-3.63 (m, 4H), 3.57 – 3.50 (m, 4H), 2.46 (t,  $J = 6.5$  Hz, 2H), 2.43 (s, 3H), 1.43 (s, 9H).

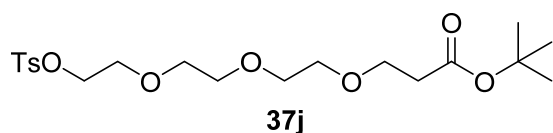

**Tert-butyl 3-(2-(2-(2-(tosyloxy)ethoxy)ethoxy)ethoxy)propanoate (37j).**

Yield: 77%.  $^1\text{H}$  NMR (400 MHz,  $\text{CDCl}_3$ )  $\delta$  7.80 (d,  $J = 8.3$  Hz, 2H), 7.34 (d,  $J = 8.0$  Hz, 2H), 4.18 – 4.14 (m, 2H), 3.69 (dd,  $J = 11.6, 5.3$  Hz, 4H), 3.58 (d,  $J = 5.5$  Hz, 8H), 2.49 (t,  $J = 6.6$  Hz, 2H), 2.45 (s, 3H), 1.44 (s, 9H).

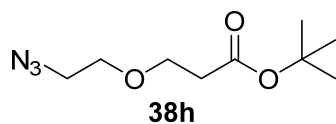

**Tert-butyl 3-(2-azidoethoxy)propanoate (38h), General procedure for syntheses of 38i, 38j.**

**37h** (3.0 g, 8.6 mmol, 1 eq) and  $\text{NaN}_3$  (2.8 g, 43 mmol, 5 eq) were dissolved in DMF (8 ml). The reaction mixture was heated to reflux for 3 h at 100 °C. After cooling to room temperature, the mixture was extracted with ethyl acetate and  $\text{H}_2\text{O}$ . The organic layer was separated, washed with brine, dried with  $\text{Na}_2\text{SO}_4$ . After filtration and evaporation, the residue was purified by silica gel column chromatography (PE / EA = 8 : 1) to obtain **38h** (1.7g, 7.9mmol, 92%) as a colorless oil:  $^1\text{H}$  NMR (400 MHz,  $\text{CDCl}_3$ )  $\delta$  3.72 (t,  $J = 6.4$  Hz, 2H), 3.65 – 3.58 (m, 2H), 3.35 (t,  $J = 5.0$  Hz, 2H), 2.51 (t,  $J = 6.4$  Hz, 2H), 1.45 (s, 9H).

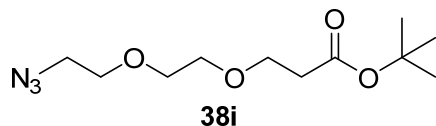

**Tert-butyl 3-(2-(2-azidoethoxy)ethoxy)propanoate.(38i).**

Yield: 88%.  $^1\text{H NMR}$  (400 MHz,  $\text{CDCl}_3$ )  $\delta$  3.72 (t,  $J = 6.5$  Hz, 2H), 3.69 – 3.60 (m, 6H), 3.38 (t,  $J = 5.1$  Hz, 2H), 2.50 (t,  $J = 6.5$  Hz, 2H), 1.44 (s, 9H).

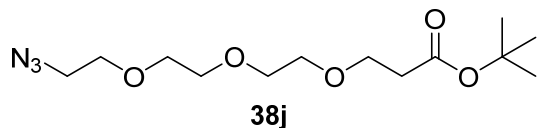

**Tert-butyl 3-(2-(2-(2-azidoethoxy)ethoxy)ethoxy)propanoate(38j).**

Yield: 79%.  $^1\text{H NMR}$  (400 MHz,  $\text{CDCl}_3$ )  $\delta$  3.74 – 3.59 (m, 12H), 3.39 (t,  $J = 5.1$  Hz, 2H), 2.50 (t,  $J = 6.6$  Hz, 2H), 1.44 (s, 9H).

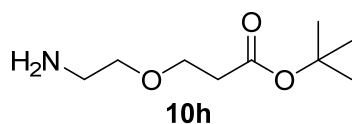

**Tert-butyl 3-(2-aminoethoxy)propanoate (10h), General procedure for syntheses of 10i, 10j.**

$\text{PPh}_3$  (1.84 g, 7.0 mmol, 1.5 eq) and water (3 mL) were added to a solution of **38h** (1.0 g, 4.7 mmol, 1eq) in THF (18 mL) and stirred at room temperature overnight. After evaporation of the solvent, the residue was purified by silica gel column chromatography (2% MeOH /  $\text{CH}_2\text{Cl}_2$  to 10% MeOH /  $\text{CH}_2\text{Cl}_2$ ) to obtain **10h** (525 mg, 2.8 mmol, 60%) as a colorless oil:  $^1\text{H NMR}$  (400 MHz,  $\text{CDCl}_3$ )  $\delta$  3.68 (t,  $J = 6.4$  Hz, 2H), 3.46 (t,  $J = 5.2$  Hz, 2H), 2.83 (t,  $J = 5.2$  Hz, 2H), 2.48 (t,  $J = 6.4$  Hz, 2H), 1.44 (s, 9H).

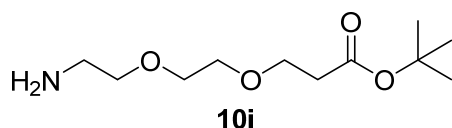

**Tert-butyl 3-(2-(2-aminoethoxy)ethoxy)propanoate (10i).**

Yield: 59%.  $^1\text{H NMR}$  (400 MHz,  $\text{CDCl}_3$ )  $\delta$  3.71 (t,  $J = 6.5$  Hz, 2H), 3.60 (d,  $J = 3.7$  Hz, 4H), 3.49 (t,  $J = 5.2$  Hz, 2H), 2.85 (t,  $J = 5.2$  Hz, 2H), 2.50 (t,  $J = 6.5$  Hz, 2H), 1.43 (s, 9H).

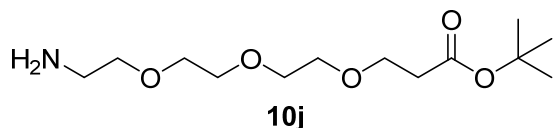

**Tert-butyl 3-(2-(2-(2-aminoethoxy)ethoxy)ethoxy)propanoate(10j).**

Yield: 65%. <sup>1</sup>H NMR (400 MHz, CDCl<sub>3</sub>) δ 3.70 (t, *J* = 6.5 Hz, 2H), 3.66 – 3.57 (m, 8H), 3.50 (t, *J* = 5.2 Hz, 2H), 2.86 (t, *J* = 5.2 Hz, 2H), 2.49 (t, *J* = 6.5 Hz, 2H), 1.43 (s, 9H).

**C) Synthesis of linker 10g:**

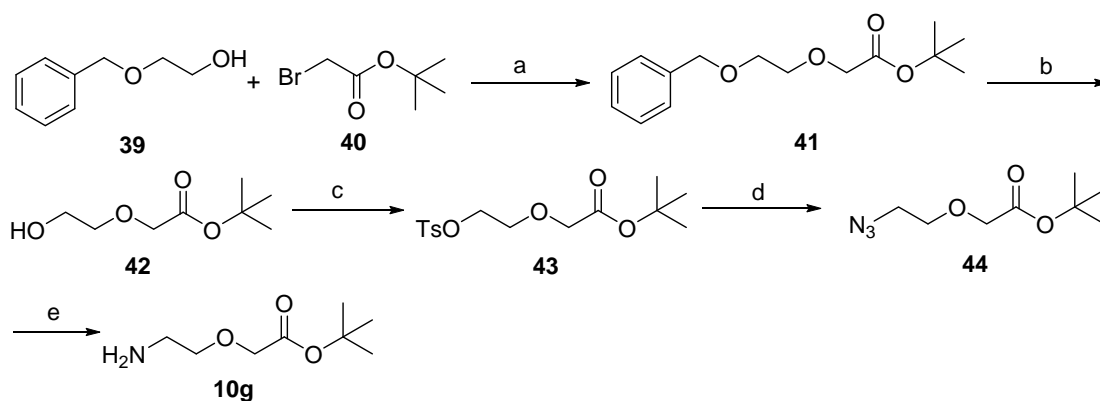

**Reaction conditions:** (a) Potassium tertbutoxide, tertbutanol, rt; (b) Pd / C, H<sub>2</sub>, EtOH, 40 °C; (c) TsCl, DMAP, TEA, DCM, rt; (d) NaN<sub>3</sub>, DMF, 100 °C, 2 h; (e) PPh<sub>3</sub>, H<sub>2</sub>O, THF, rt.

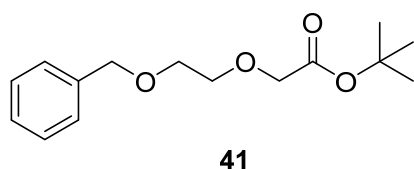

**Tert-butyl 2-(2-(benzyloxy)ethoxy)acetate (41).**

To a solution of Potassium tertbutoxide (2.24 g, 20 mmol, 1 eq) in anhydrous tertbutanol (24 mL), compound **39** (3.00 g, 20 mmol, 1 eq) was added and stirred at RT for 30 min. Then the flask was cooled to 10 °C and tert-butyl bromoacetate (3.90 g, 20 mmol, 1 eq) was added and stirred at RT for 16 h. The mixture was extracted with ethyl acetate and H<sub>2</sub>O. The organic layer was separated, washed with brine, dried with Na<sub>2</sub>SO<sub>4</sub>. After filtration and evaporation, the residue was purified by silica gel column chromatography (PE / EA = 6 : 1) to obtain **41** (2.60 g, 9.76 mmol, 49 %) as a

colorless oil:  $^1\text{H NMR}$  (400 MHz,  $\text{CDCl}_3$ )  $\delta$  7.39 – 7.22 (m, 5H), 4.58 (s, 2H), 4.04 (s, 2H), 3.74 (dd,  $J = 5.7, 3.4$  Hz, 2H), 3.67 (dd,  $J = 5.9, 3.4$  Hz, 2H), 1.47 (s, 9H).

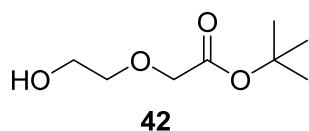

**Tert-butyl 2-(2-hydroxyethoxy)acetate (42).**

Ester **41** (2.40 g, 9.01 mmol, 1 eq) and 10% palladium on carbon catalyst (200 mg) were mixed in ethanol (15 mL), stirred for 24 h at 45 °C under an atmosphere of hydrogen. The reaction mixture was filtered through a pad of Celite, washed with ethyl acetate. The filtrate was extracted with ethyl acetate and  $\text{H}_2\text{O}$ . The combined organic layer were washed with brine and dried with  $\text{Na}_2\text{SO}_4$ . After filtration and evaporation, the residue was purified by silica gel column chromatography (PE / EA = 1 : 1) to obtain **42** (680 mg, 3.86 mmol, 43 %) as a colorless oil:  $^1\text{H NMR}$  (400 MHz,  $\text{CDCl}_3$ )  $\delta$  4.01 (s, 2H), 3.73 (t,  $J = 4.4$  Hz, 2H), 3.66 (dd,  $J = 5.2, 3.4$  Hz, 2H), 2.97 (s, 1H), 1.48 (s, 9H).

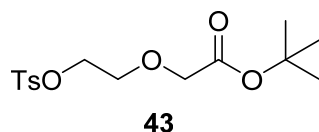

**Following the procedure used in the synthesis of linker 10h, linker 10g was obtained with 42 instead of 36h. Tert-butyl 2-(2-(tosyloxy)ethoxy)acetate (43).**

Yield: 78%.  $^1\text{H NMR}$  (400 MHz,  $\text{CDCl}_3$ )  $\delta$  7.80 (d,  $J = 8.3$  Hz, 2H), 7.34 (d,  $J = 8.2$  Hz, 2H), 4.22 – 4.16 (m, 2H), 3.94 (s, 2H), 3.78 – 3.74 (m, 2H), 2.44 (s, 3H), 1.45 (s, 9H).

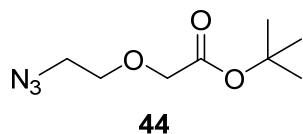

**Tert-butyl 2-(2-azidoethoxy)acetate (44).**

Yield: 85%.  $^1\text{H NMR}$  (400 MHz,  $\text{CDCl}_3$ )  $\delta$  4.02 (s, 2H), 3.73 (dd,  $J = 6.9, 3.3$  Hz, 2H), 3.44 (t,  $J = 5.1$  Hz, 2H), 1.48 (s, 9H).

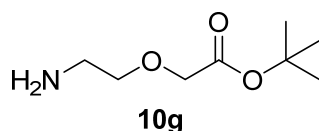

### Tert-butyl 2-(2-aminoethoxy)acetate(10g).

Yield: 55%.  $^1\text{H NMR}$  (400 MHz,  $\text{CDCl}_3$ )  $\delta$  3.94 (s, 2H), 3.79 (t,  $J = 5.0$  Hz, 2H), 3.52 (t,  $J = 5.0$  Hz, 2H), 1.43 (s, 9H).

## 2.3 General procedure for preparing ERR $\alpha$ -PROTACS

### A) Synthesis of PROTAC 6a-b, 6d, 6g-j:

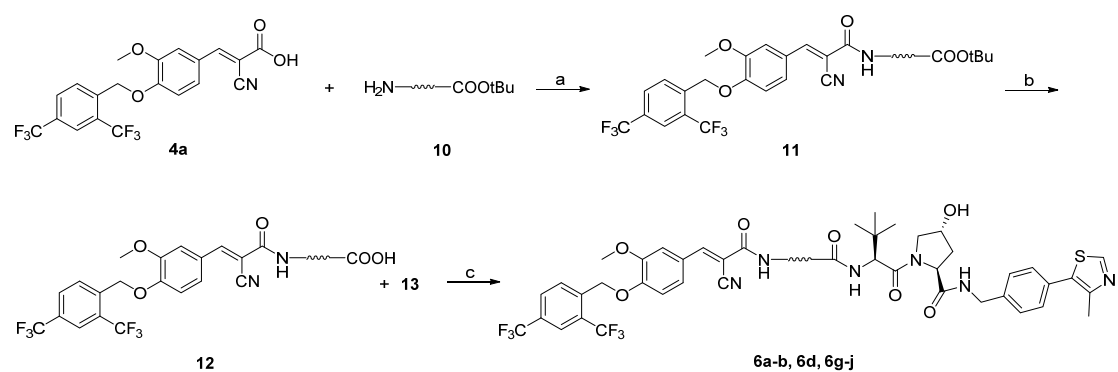

### B) Synthesis of PROTAC 6c, 6e-f:

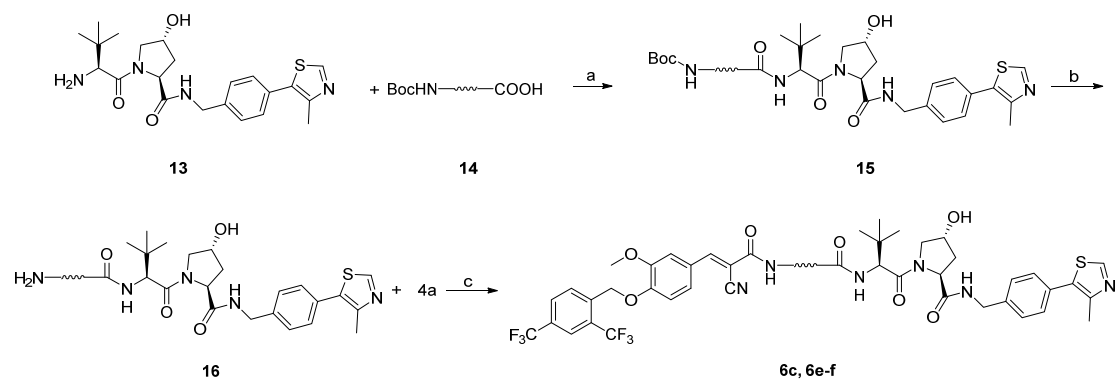

### C) Synthesis of PROTAC 7a-h:

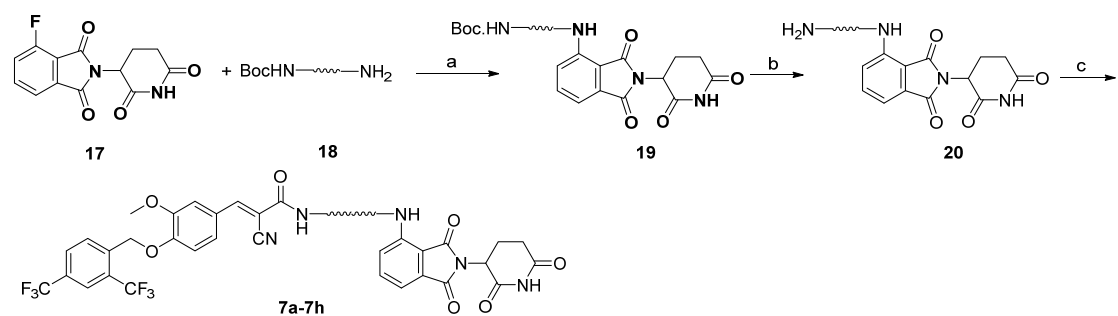



## D) Synthesis of PROTAC 8a-b:

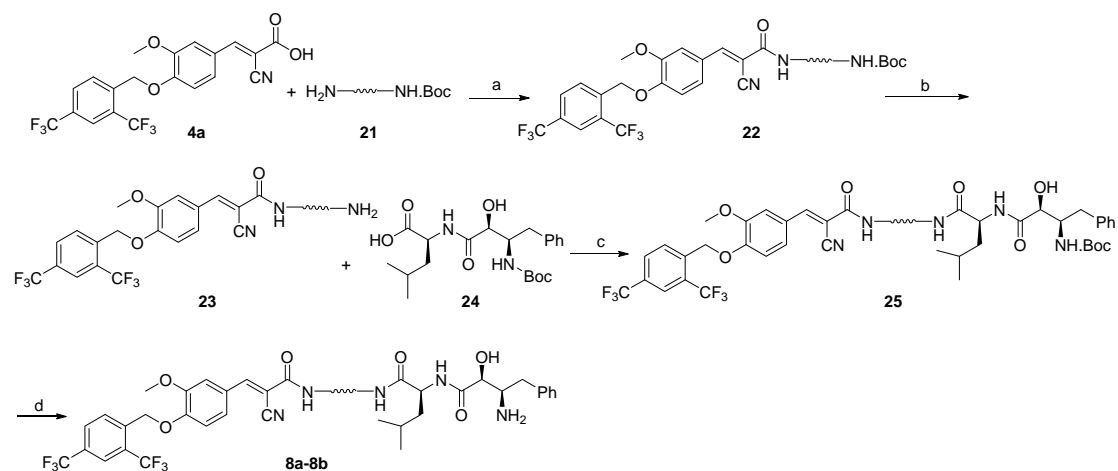

## E) Synthesis of PROTAC 9a-b:

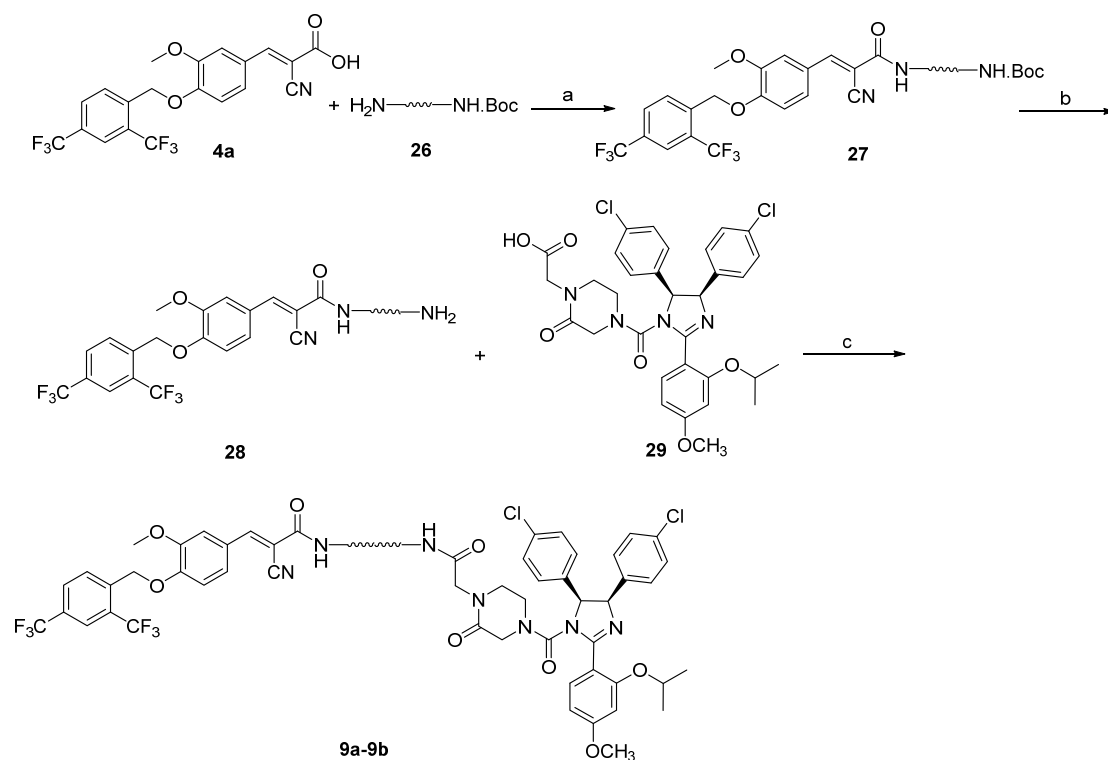

**Reagents and conditions:** (a) HATU, DIPEA, DMF, rt; (b) TFA, DCM, rt; (c) HATU, DIPEA, DMF, rt; B. (a) HATU, DIPEA, DMF, rt; (b) TFA, DCM, rt; (c) HATU, DIPEA, DMF, rt; C. (a) DIPEA, DMF, 90°C; (b) TFA, DCM, rt; (c) HATU, DIPEA, DMF, rt; D. (a) HATU, DIPEA, DMF, rt; (b) TFA, DCM, rt; (c) HATU, DIPEA, DMF, rt; (d) 4 N HCl in 1,4-dioxane, DCM, rt; E. (a) HATU, DIPEA, DMF, rt; (b) TFA,

DCM, rt; (c) HATU, DIPEA, DMF, rt.

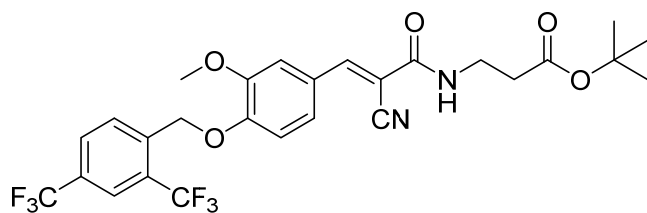

**11a**

**Tert-butyl (*E*)-3-(3-(4-((2,4-bis(trifluoromethyl)benzyl)oxy)-3-methoxyphenyl)-2-cyanoacrylamido)propanoate (11a). General procedure for syntheses of 11b, 11d, 11g-11j.**

**10a** (77 mg, 0.53 mmol, 1.2 eq), HATU (216.7 mg, 0.57 mmol, 1.3 eq) and DIPEA (0.22 mL, 1.3 mmol, 3 eq) was added to a solution of carboxylic acid **4a** (200 mg, 0.44 mmol, 1 eq) in dry DMF (3 mL). After being stirred for 1 h at RT, the resulting mixture was extracted with ethyl acetate and saturated NaHCO<sub>3</sub>. The organic layer was separated, washed with brine, dried with Na<sub>2</sub>SO<sub>4</sub>. After filtration and evaporation, the residue was purified by silica gel column chromatography (PE / EA = 2 : 1) to give **11a** (170 mg, 0.30 mmol, 68% yield) as yellow solid: <sup>1</sup>H NMR (400 MHz, CDCl<sub>3</sub>) δ 8.21 (s, 1H), 7.95 (d, *J* = 5.7 Hz, 2H), 7.85 (d, *J* = 8.3 Hz, 1H), 7.74 (d, *J* = 2.0 Hz, 1H), 7.39 (dd, *J* = 8.5, 2.1 Hz, 1H), 6.94 (t, *J* = 5.8 Hz, 1H), 6.87 (d, *J* = 8.4 Hz, 1H), 5.46 (s, 2H), 3.98 (s, 3H), 3.66 (dd, *J* = 12.1, 6.0 Hz, 2H), 2.55 (t, *J* = 6.1 Hz, 2H), 1.49 (s, 9H).

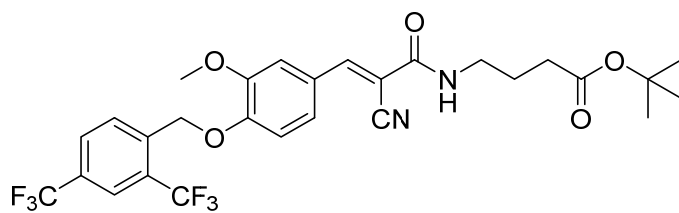

**11b**

**Tert-butyl (*E*)-4-(3-(4-((2,4-bis(trifluoromethyl)benzyl)oxy)-3-methoxyphenyl)-2-cyanoacrylamido)butanoate (11b).**

Yield: 61%. <sup>1</sup>H NMR (400 MHz, CDCl<sub>3</sub>) δ 8.22 (s, 1H), 7.95 (d, *J* = 5.3 Hz, 2H), 7.85 (d, *J* = 8.2 Hz, 1H), 7.73 (d, *J* = 2.0 Hz, 1H), 7.40 (dd, *J* = 8.5, 2.0 Hz, 1H), 6.87 (d, *J* = 8.4 Hz, 1H), 6.59 (t, *J* = 5.4 Hz, 1H), 5.46 (s, 2H), 3.98 (s, 3H), 3.47 (dd, *J* = 12.8, 6.8 Hz, 2H), 2.33 (t, *J* = 7.1 Hz, 2H), 1.90 (t, *J* = 7.0 Hz, 2H), 1.46 (s, 9H).

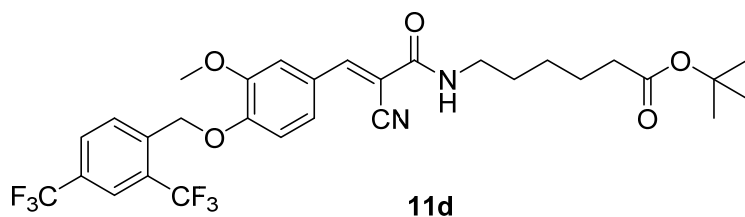

**Tert-butyl (*E*)-6-(3-(4-((2,4-bis(trifluoromethyl)benzyl)oxy)-3-methoxyphenyl)-2-cyanoacrylamido)hexanoate (11d).**

Yield: 54%. <sup>1</sup>H NMR (400 MHz, CDCl<sub>3</sub>) δ 8.22 (s, 1H), 7.95 (d, *J* = 3.8 Hz, 2H), 7.85 (d, *J* = 8.2 Hz, 1H), 7.71 (d, *J* = 2.0 Hz, 1H), 7.40 (dd, *J* = 8.5, 2.0 Hz, 1H), 6.87 (d, *J* = 8.5 Hz, 1H), 6.34 (t, *J* = 5.6 Hz, 1H), 5.46 (s, 2H), 3.98 (s, 3H), 3.42 (dd, *J* = 13.2, 7.0 Hz, 2H), 2.23 (t, *J* = 7.4 Hz, 2H), 1.67 – 1.58 (m, 4H), 1.44 (s, 9H), 1.42–1.35 (m, 2H).

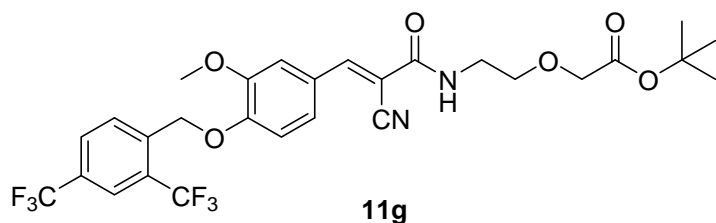

**Tert-butyl (*E*)-2-(2-(3-(4-((2,4-bis(trifluoromethyl)benzyl)oxy)-3-methoxyphenyl)-2-cyanoacrylamido)ethoxy)acetate (11g).**

Yield: 69%. <sup>1</sup>H NMR (400 MHz, CDCl<sub>3</sub>) δ 8.22 (s, 1H), 7.95 (d, *J* = 4.6 Hz, 2H), 7.85 (d, *J* = 8.0 Hz, 1H), 7.74 (d, *J* = 2.1 Hz, 1H), 7.41 (dd, *J* = 8.6, 2.0 Hz, 1H), 7.21 (t, *J* = 4.8 Hz, 1H), 6.87 (d, *J* = 8.5 Hz, 1H), 5.46 (s, 2H), 4.01 (s, 2H), 3.99 (s, 3H), 3.72 (t, *J* = 4.9 Hz, 2H), 3.67 – 3.62 (m, 2H), 1.49 (s, 9H).

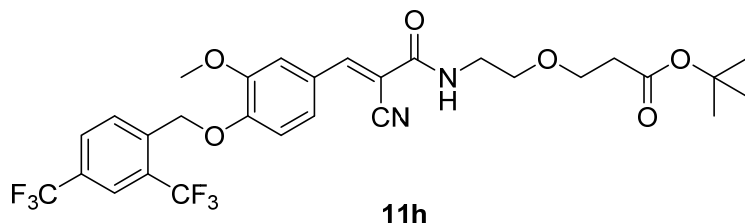

**Tert-butyl (*E*)-3-(2-(3-(4-((2,4-bis(trifluoromethyl)benzyl)oxy)-3-methoxyphenyl)-2-cyanoacrylamido)ethoxy)propanoate (11h).**

Yield: 66%. <sup>1</sup>H NMR (400 MHz, CDCl<sub>3</sub>) δ 8.21 (s, 1H), 7.95 (d, *J* = 5.0 Hz, 2H), 7.85 (d, *J* = 8.2 Hz, 1H), 7.73 (d, *J* = 2.0 Hz, 1H), 7.40 (dd, *J* = 8.5, 2.0 Hz, 1H), 6.87 (d, *J* = 8.4 Hz, 1H), 6.76 (s, 1H), 5.46 (s, 2H), 3.98 (s, 3H), 3.72 (t, *J* = 6.3 Hz, 2H), 3.61 (d,

$J = 2.5$  Hz, 4H), 2.52 (t,  $J = 6.3$  Hz, 2H), 1.46 (s, 9H).

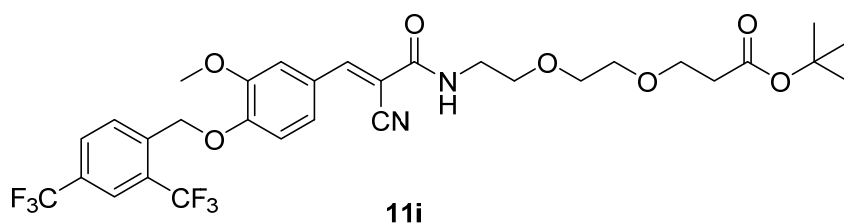

**Tert-butyl (*E*)-3-(2-(2-(3-(4-((2,4-bis(trifluoromethyl)benzyl)oxy)-3-methoxyphenyl)-2-cyanoacrylamido)ethoxy)ethoxy)propanoate (11i).**

Yield: 54%.  $^1\text{H NMR}$  (400 MHz,  $\text{CDCl}_3$ )  $\delta$  8.22 (s, 1H), 7.95 (d,  $J = 4.1$  Hz, 2H), 7.85 (d,  $J = 8.2$  Hz, 1H), 7.73 (s, 1H), 7.40 (d,  $J = 8.4$  Hz, 1H), 6.85 (dd,  $J = 14.3, 6.7$  Hz, 2H), 5.46 (s, 2H), 3.98 (s, 3H), 3.74 (t,  $J = 6.5$  Hz, 2H), 3.69 – 3.58 (m, 8H), 2.52 (t,  $J = 6.5$  Hz, 2H), 1.44 (s, 9H).

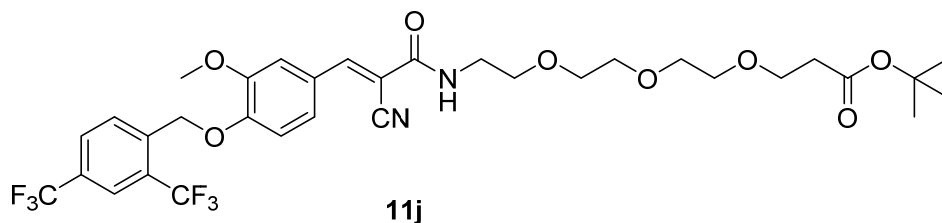

**Tert-butyl (*E*)-1-(4-((2,4-bis(trifluoromethyl)benzyl)oxy)-3-methoxyphenyl)-2-cyano-3-oxo-7,10,13-trioxa-4-azahexadec-1-en-16-oate (11j).**

Yield: 56%.  $^1\text{H NMR}$  (400 MHz,  $\text{CDCl}_3$ )  $\delta$  8.21 (s, 1H), 7.95 (s, 2H), 7.85 (d,  $J = 8.2$  Hz, 1H), 7.73 (s, 1H), 7.40 (d,  $J = 8.4$  Hz, 1H), 6.91 – 6.80 (m, 2H), 5.46 (s, 2H), 3.98 (s, 3H), 3.74-3.59 (m, 14H), 2.49 (t,  $J = 6.6$  Hz, 2H), 1.43 (s, 9H).

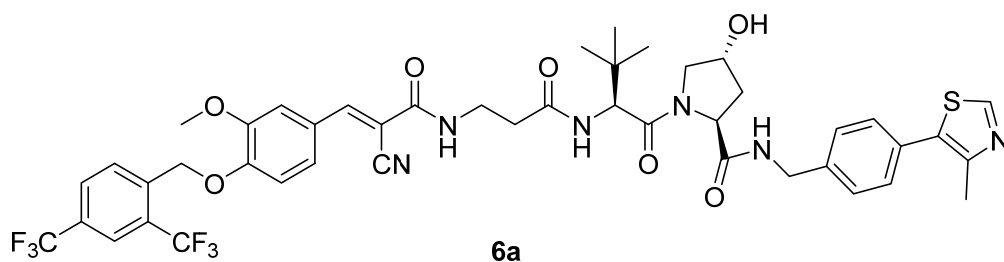

**(2*S*,4*R*)-1-((*S*)-2-(3-((*E*)-3-(4-((2,4-bis(trifluoromethyl)benzyl)oxy)-3-methoxyphenyl)-2-cyanoacrylamido)propanamido)-3,3-dimethylbutanoyl)-4-hydroxy-*N*-(4-(4-methylthiazol-5-yl)benzyl)pyrrolidine-2-carboxamide (6a). General procedure for syntheses of 6b, 6d, 6g-6j.**

TFA (1 mL) was added to a solution of Compound 11a (100 mg, 0.17 mmol, 1 eq) in

DCM (2 mL). After being stirred for 1 h, the solvent was removed in vacuo, and residual TFA was removed by the addition and evaporation of toluene (3 x 3mL). The crude product was used to next step without further purification. HATU (83.6 mg, 0.22 mmol, 1.3 eq), DIPEA (85  $\mu$ L, 0.51 mmol, 3 eq) and **13** (86.1 mg, 0.2 mmol, 1.2 eq) was added to a solution of the crude product obtained above (1.0 eq.) in DMF (2 ml) at 25  $^{\circ}$ C. After being stirred for 1 h, the resulting mixture was extracted with ethyl acetate and saturated NaHCO<sub>3</sub>. The organic layer was separated, washed with brine, dried with Na<sub>2</sub>SO<sub>4</sub>. After filtration and evaporation, the residue was purified by silica gel column chromatography (MeOH : CH<sub>2</sub>Cl<sub>2</sub> = 4 : 96) to give **6a** (62 mg, 0.067 mmol, 39% ) as a white solid: <sup>1</sup>H NMR (400 MHz, CDCl<sub>3</sub>)  $\delta$  8.66 (s, 1H), 8.17 (s, 1H), 7.94 (d, *J* = 8.7 Hz, 2H), 7.84 (d, *J* = 8.1 Hz, 1H), 7.66 (d, *J* = 1.9 Hz, 1H), 7.40 – 7.28 (m, 6H), 7.23 (s, 1H), 6.84 (d, *J* = 8.5 Hz, 1H), 6.53 (t, *J* = 9.9 Hz, 1H), 5.42 (s, 2H), 4.72 (t, *J* = 8.1 Hz, 1H), 4.58 (dd, *J* = 16.4, 7.9 Hz, 3H), 4.29 (dd, *J* = 15.1, 5.2 Hz, 1H), 4.08 (d, *J* = 11.0 Hz, 1H), 3.94 (s, 3H), 3.75 (dd, *J* = 12.8, 6.4 Hz, 1H), 3.67-3.51 (m, 2H), 3.38 (s, 1H), 2.58 – 2.45 (m, 6H), 2.16 (dd, *J* = 13.5, 8.0 Hz, 1H), 0.93 (s, 9H). <sup>13</sup>C NMR (101 MHz, CDCl<sub>3</sub>)  $\delta$  171.98, 171.70, 170.79, 160.89, 152.45, 151.14, 150.29, 149.69, 148.46, 139.04, 138.07, 131.53, 130.94, 130.55 (q, *J* = 34.34 Hz), 129.47, 129.24, 128.69, 128.02, 127.79 (q, *J* = 33.33 Hz), 126.46, 125.85, 124.70 (d, *J* = 25.25 Hz), 123.20, 122.00 (q, *J* = 23.23 Hz), 117.41, 113.01, 112.26, 101.46, 77.24, 70.26, 66.25, 58.59, 57.91, 57.07, 56.07, 43.19, 36.67, 36.07, 35.17, 34.99, 26.41, 16.06. HRMS (ESI<sup>+</sup>): calculated for C<sub>45</sub>H<sub>47</sub>F<sub>6</sub>N<sub>6</sub>O<sub>7</sub>S [M + H]<sup>+</sup>: 929.3126, found 929.3132. HPLC analysis: MeOH : H<sub>2</sub>O (85 : 15), 10.13 min, 95.17% purity.

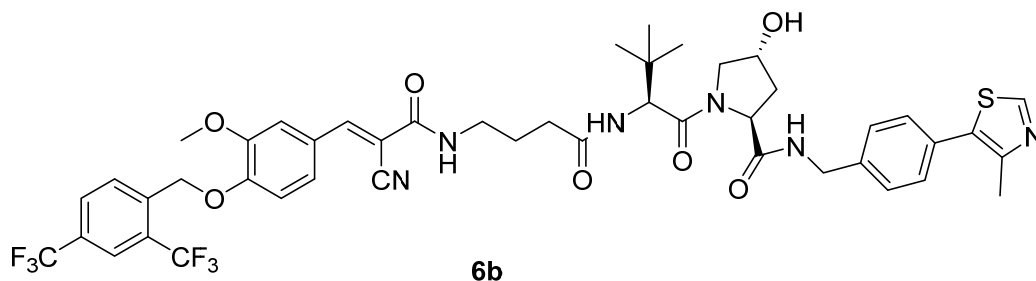

**(2*S*,4*R*)-1-((*S*)-2-(4-((*E*)-3-(4-((2,4-bis(trifluoromethyl)benzyl)oxy)-3-methoxyphenyl)-2-cyanoacrylamido)butanamido)-3,3-dimethylbutanoyl)-4-hydroxy-*N*-(4-(4-methylthiazol-5-yl)benzyl)pyrrolidine-2-carboxamide (6b).**

Yield: 59%.  $^1\text{H}$  NMR (400 MHz,  $\text{CDCl}_3$ )  $\delta$  8.67 (s, 1H), 8.21 (s, 1H), 7.95 (d,  $J = 6.7$  Hz, 2H), 7.85 (d,  $J = 8.5$  Hz, 1H), 7.68 (d,  $J = 1.9$  Hz, 1H), 7.42 – 7.31 (m, 6H), 7.28 (s, 1H), 6.87 (d,  $J = 8.5$  Hz, 1H), 6.57 (d,  $J = 8.5$  Hz, 1H), 5.45 (s, 2H), 4.74 (t,  $J = 8.0$  Hz, 1H), 4.62–.48 (m, 3H), 4.32 (dd,  $J = 14.9, 5.2$  Hz, 1H), 4.17 (d,  $J = 11.4$  Hz, 1H), 3.97 (s, 3H), 3.61 (dd,  $J = 11.3, 3.4$  Hz, 1H), 3.54 – 3.35 (m, 3H), 2.59 – 2.48 (m, 4H), 2.35 (dd,  $J = 11.7, 6.0$  Hz, 2H), 2.15 (dd,  $J = 13.4, 8.1$  Hz, 1H), 1.97 – 1.85 (m, 2H), 0.95 (s, 9H).  $^{13}\text{C}$  NMR (101 MHz,  $\text{CDCl}_3$ )  $\delta$  173.48, 171.89, 170.73, 161.15, 152.68, 151.11, 150.30, 149.71, 148.47, 139.08, 138.06, 131.56, 130.98, 130.55 (q,  $J = 33.33$  Hz), 129.52 129.25, 128.71, 128.11, 127.80 (q,  $J = 32.32$  Hz), 126.44, 125.90, 124.71 (d,  $J = 25.25$  Hz), 123.24, 122.00 (d,  $J = 23.23$  Hz), 117.47, 113.05, 112.27, 101.44, 77.24, 70.18, 66.24, 58.56, 58.02, 56.93, 56.08, 43.25, 40.28, 35.83, 34.71, 33.66, 26.45, 24.76, 16.07. HRMS (ESI $^+$ ): calculated for  $\text{C}_{46}\text{H}_{49}\text{F}_6\text{N}_6\text{O}_7\text{S}$  [ $\text{M} + \text{H}$ ] $^+$ : 943.3282, found 943.3287. HPLC analysis: MeOH :  $\text{H}_2\text{O}$  (85 : 15), 10.80 min, 98.13% purity.

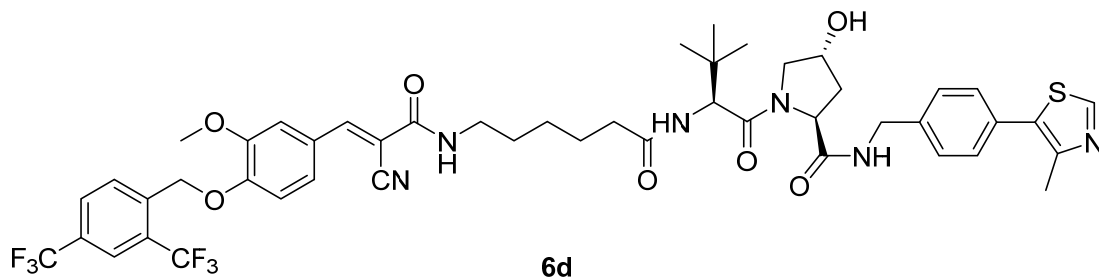

**(2*S*,4*R*)-1-((*S*)-2-(6-((*E*)-3-(4-((2,4-bis(trifluoromethyl)benzyl)oxy)-3-methoxyphenyl)-2-cyanoacrylamido)hexanamido)-3,3-dimethylbutanoyl)-4-hydroxy-*N*-(4-(4-methylthiazol-5-yl)benzyl)pyrrolidine-2-carboxamide (6d).**

Yield: 44%.  $^1\text{H}$  NMR (400 MHz,  $\text{CDCl}_3$ )  $\delta$  8.67 (s, 1H), 8.19 (s, 1H), 7.96 (s, 2H), 7.85 (d,  $J = 7.7$  Hz, 1H), 7.69 (s, 1H), 7.35 (s, 6H), 6.86 (d,  $J = 8.3$  Hz, 1H), 6.48 (s, 1H), 6.17 (d,  $J = 7.6$  Hz, 1H), 5.45 (s, 2H), 4.73 (t,  $J = 7.7$  Hz, 1H), 4.56 (dd,  $J = 21.1, 7.0$  Hz, 3H), 4.33 (dd,  $J = 14.9, 4.6$  Hz, 1H), 4.11 (d,  $J = 9.9$  Hz, 1H), 3.97 (s, 3H), 3.59 (d,  $J = 9.5$  Hz, 1H), 3.39 (d,  $J = 5.8$  Hz, 3H), 2.50 (s, 3H), 2.19 (dd,  $J = 22.4, 6.1$  Hz, 3H), 1.70 – 1.54 (m, 4H), 1.40 (dd,  $J = 26.9, 12.1$  Hz, 3H), 0.93 (s, 9H).  $^{13}\text{C}$  NMR (101 MHz,  $\text{CDCl}_3$ )  $\delta$  173.51, 171.89, 170.79, 160.67, 152.38, 151.10, 150.30, 149.72, 148.47, 139.09, 138.08, 131.56, 130.96, 130.54 (q,  $J = 34.34\text{Hz}$ ), 129.51, 129.25,

128.71, 128.07, 127.80 (q,  $J = 32.32\text{Hz}$ ), 126.49, 125.91, 124.71 (d,  $J = 25.25\text{Hz}$ ), 123.22, 122.00 (d,  $J = 23.23\text{Hz}$ ), 117.64, 113.05, 112.15, 101.43, 77.24, 70.06, 66.24, 58.51, 57.48, 56.82, 56.08, 43.23, 40.32, 36.05, 35.96, 34.94, 29.00, 26.41, 26.17, 24.92, 16.07. HRMS (ESI<sup>+</sup>): calculated for C<sub>48</sub>H<sub>53</sub>F<sub>6</sub>N<sub>6</sub>O<sub>7</sub>S [M + H]<sup>+</sup>: 971.3595, found 971.3595. HPLC analysis: MeOH : H<sub>2</sub>O (85 : 15), 10.73 min, 96.53% purity.

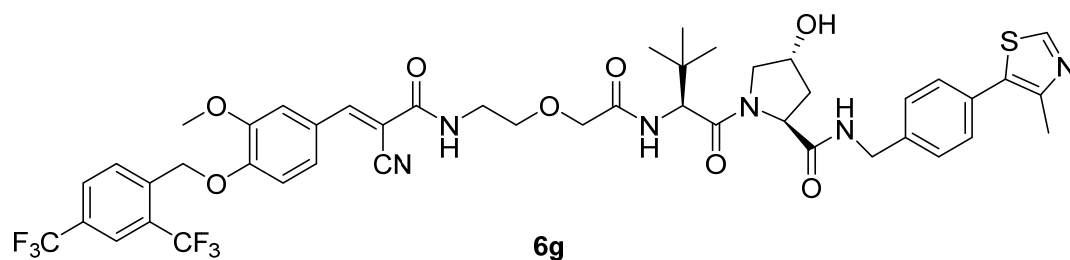

**(2*S*,4*R*)-1-((*S*)-2-(((2-((*E*)-3-(4-((2,4-bis(trifluoromethyl)benzyl)oxy)-3-methoxyphenyl)-2-cyanoacrylamido)ethoxy)methyl)amino)-3,3-dimethylbutanoyl)-4-hydroxy-*N*-(4-(4-methylthiazol-5-yl)benzyl)pyrrolidine-2-carboxamide (6g).**

Yield: 35%. <sup>1</sup>H NMR (400 MHz, CDCl<sub>3</sub>) δ 8.65 (s, 1H), 8.22 (s, 1H), 7.94 (d,  $J = 6.8$  Hz, 2H), 7.84 (d,  $J = 8.2$  Hz, 1H), 7.68 (s, 1H), 7.46 – 7.29 (m, 6H), 7.15 (d,  $J = 8.6$  Hz, 1H), 7.07 (s, 1H), 6.86 (d,  $J = 8.4$  Hz, 1H), 5.44 (s, 2H), 4.72 (t,  $J = 7.8$  Hz, 1H), 4.53 (dd,  $J = 16.0, 7.9$  Hz, 3H), 4.31 (dd,  $J = 15.0, 5.4$  Hz, 1H), 4.04 (t,  $J = 12.9$  Hz, 2H), 3.94 (s, 3H), 3.77 – 3.69 (m, 1H), 3.62 (dd,  $J = 15.8, 4.0$  Hz, 4H), 2.49 (s, 4H), 2.11 (dd,  $J = 13.5, 8.1$  Hz, 1H), 1.99 (s, 2H), 0.94 (s, 9H). <sup>13</sup>C NMR (101 MHz, CDCl<sub>3</sub>) δ 171.36, 170.73, 169.87, 161.15, 152.83, 151.20, 150.30, 149.72, 148.44, 139.04, 138.13, 131.56, 130.92, 130.56 (q,  $J = 33.33$  Hz), 129.46, 129.25, 128.72, 128.09, 127.80 (q,  $J = 32.32$  Hz), 126.52, 125.86, 124.7 (d,  $J = 24.24$  Hz), 123.24, 122.00 (d,  $J = 23.23$  Hz), 117.44, 113.06, 112.27, 101.28, 77.24, 70.18, 66.25, 60.42, 58.58, 57.02, 56.84, 56.07, 43.18, 40.33, 35.91, 35.28, 26.41, 16.05. HRMS (ESI<sup>+</sup>): calculated for C<sub>46</sub>H<sub>49</sub>F<sub>6</sub>N<sub>6</sub>O<sub>8</sub>S [M + H]<sup>+</sup>: 959.3231, found 959.3239. HPLC analysis: MeOH : H<sub>2</sub>O (85 : 15), 9.62 min, 99.10% purity.

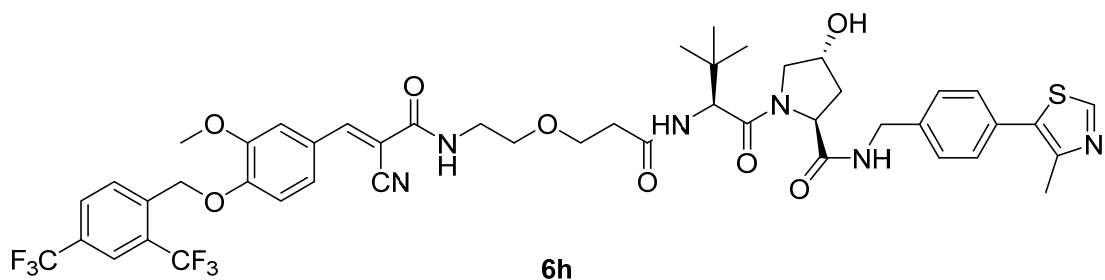

**(2*S*,4*R*)-1-((*S*)-2-(3-(2-((*E*)-3-(4-((2,4-bis(trifluoromethyl)benzyl)oxy)-3-methoxyphenyl)-2-cyanoacrylamido)ethoxy)propanamido)-3,3-dimethylbutanoyl)-4-hydroxy-*N*-(4-(4-methylthiazol-5-yl)benzyl)pyrrolidine-2-carboxamide (6h).**

Yield: 56%. <sup>1</sup>H NMR (400 MHz, CDCl<sub>3</sub>) δ 8.66 (s, 1H), 8.20 (s, 1H), 7.95 (d, *J* = 7.0 Hz, 2H), 7.85 (d, *J* = 8.2 Hz, 1H), 7.67 (d, *J* = 2.0 Hz, 1H), 7.40 – 7.32 (m, 6H), 7.20 (t, *J* = 5.1 Hz, 1H), 7.04 (d, *J* = 8.7 Hz, 1H), 6.87 (d, *J* = 8.5 Hz, 1H), 5.44 (s, 2H), 4.77 (t, *J* = 8.0 Hz, 1H), 4.59 (q, *J* = 6.6 Hz, 2H), 4.51 (s, 1H), 4.30 (dd, *J* = 15.0, 5.1 Hz, 1H), 4.10 (d, *J* = 11.3 Hz, 1H), 3.95 (s, 3H), 3.74 (td, *J* = 9.9, 4.0 Hz, 2H), 3.67 – 3.54 (m, 5H), 3.13 (s, 1H), 2.56 – 2.45 (m, 6H), 2.13 (dd, *J* = 13.5, 8.1 Hz, 1H), 0.94 (s, 9H). <sup>13</sup>C NMR (101 MHz, CDCl<sub>3</sub>) δ 171.79, 171.66, 170.92, 161.10, 152.71, 151.14, 150.28, 149.70, 148.43, 139.06, 138.15, 131.57, 130.88, 130.55 (q, *J* = 33.33 Hz), 129.41, 129.25, 128.71, 128.03, 127.80 (q, *J* = 32.32 Hz), 126.44, 125.88, 124.71 (d, *J* = 25.25 Hz), 123.24, 122.00 (d, *J* = 23.23 Hz), 117.49, 113.05, 112.28, 101.46, 77.24, 70.19, 69.22, 66.56 (d, *J* = 57.57 Hz), 66.24, 58.48, 57.44, 56.92, 56.07, 43.16, 40.79, 36.58, 36.04, 35.38, 26.41, 16.06. HRMS (ESI<sup>+</sup>): calculated for C<sub>47</sub>H<sub>50</sub>F<sub>6</sub>N<sub>6</sub>NaO<sub>8</sub>S [M + Na]<sup>+</sup>: 995.3207, found 995.3209. HPLC analysis: MeOH:H<sub>2</sub>O (85 : 15), 10.18 min, 96.36% purity.

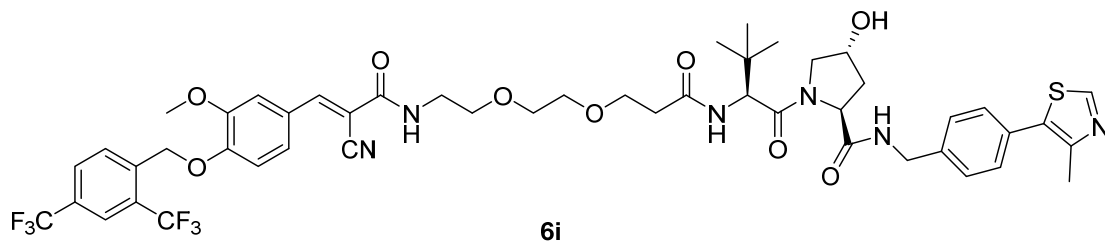

**(2*S*,4*R*)-1-((*S*,*E*)-16-(4-((2,4-bis(trifluoromethyl)benzyl)oxy)-3-methoxyphenyl)-2-(tert-butyl)-15-cyano-4,14-dioxo-7,10-dioxa-3,13-diazahexadec-15-enoyl)-4-hydroxy-*N*-(4-(4-methylthiazol-5-yl)benzyl)pyrrolidine-2-carboxamide (6i).**

Yield: 61%. <sup>1</sup>H NMR (400 MHz, CDCl<sub>3</sub>) δ 8.66 (s, 1H), 8.19 (s, 1H), 7.95 (d, *J* = 7.1



Hz, 2H), 7.84 (d,  $J = 8.2$  Hz, 1H), 7.69 (d,  $J = 1.8$  Hz, 1H), 7.46 – 7.29 (m, 6H), 7.06 (d,  $J = 7.6$  Hz, 2H), 6.86 (d,  $J = 8.5$  Hz, 1H), 5.44 (s, 2H), 4.72 (t,  $J = 8.0$  Hz, 1H), 4.63 – 4.46 (m, 3H), 4.31 (dd,  $J = 15.0, 5.2$  Hz, 1H), 4.11 (d,  $J = 10.8$  Hz, 1H), 3.96 (s, 3H), 3.72 (d,  $J = 6.8$  Hz, 2H), 3.67 – 3.27 (m, 10H), 2.58 – 2.38 (m, 6H), 2.12 (dd,  $J = 13.5, 8.1$  Hz, 1H), 0.94 (s, 9H).  $^{13}\text{C}$  NMR (101 MHz,  $\text{CDCl}_3$ )  $\delta$  172.06, 171.91, 170.80, 160.93, 152.52, 151.11, 150.27, 149.73, 148.45, 139.09, 138.14, 131.57, 130.92, 130.54 (q,  $J = 33.33$  Hz), 129.4, 129.25, 128.70, 128.08, 127.79 (q,  $J = 32.32$  Hz), 126.54, 125.88, 124.71 (d,  $J = 25.25$  Hz), 123.23, 122.00 (d,  $J = 23.23$  Hz), 117.42, 113.04, 112.17, 101.50, 77.23, 70.31, 70.19, 70.13, 69.19, 67.15, 66.23, 58.37, 57.59, 56.76, 56.12, 43.22, 40.23, 36.70, 35.93, 34.99, 26.41, 16.07. HRMS (ESI<sup>+</sup>): calculated for  $\text{C}_{49}\text{H}_{55}\text{F}_6\text{N}_6\text{O}_9\text{S}$  [ $\text{M} + \text{H}$ ]<sup>+</sup>: 1017.3650, found 1017.3635. HPLC analysis: MeOH : H<sub>2</sub>O (85 : 15), 10.31 min, 98.32% purity.

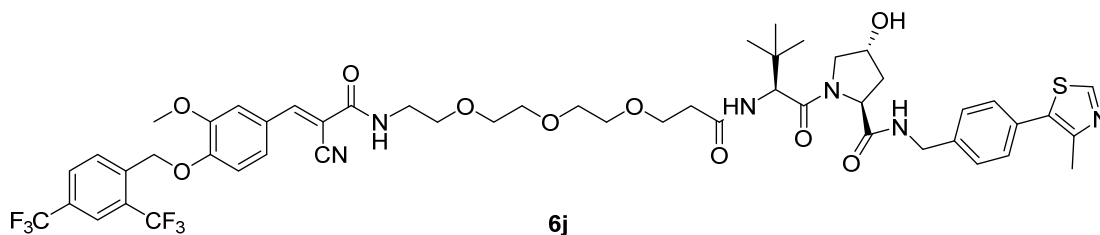

**(2*S*,4*R*)-1-((*S*,*E*)-19-(4-((2,4-bis(trifluoromethyl)benzyl)oxy)-3-methoxyphenyl)-2-(tert-butyl)-18-cyano-4,17-dioxo-7,10,13-trioxa-3,16-diazanonadec-18-enoyl)-4-hydroxy-*N*-(4-(4-methylthiazol-5-yl)benzyl)pyrrolidine-2-carboxamide (6j).**

Yield: 40%.  $^1\text{H}$  NMR (400 MHz,  $\text{CDCl}_3$ )  $\delta$  8.66 (s, 1H), 8.21 (s, 1H), 7.95 (d,  $J = 4.6$  Hz, 2H), 7.85 (d,  $J = 8.1$  Hz, 1H), 7.70 (d,  $J = 1.8$  Hz, 1H), 7.44 – 7.30 (m, 6H), 7.05 – 6.94 (m, 2H), 6.87 (d,  $J = 8.5$  Hz, 1H), 5.45 (s, 2H), 4.73 (t,  $J = 8.0$  Hz, 1H), 4.61 – 4.44 (m, 3H), 4.33 (dd,  $J = 15.0, 5.2$  Hz, 1H), 4.13 (d,  $J = 11.5$  Hz, 1H), 3.97 (s, 3H), 3.71 (t,  $J = 6.9$  Hz, 2H), 3.68 – 3.52 (m, 13H), 3.47 (s, 1H), 2.57 – 2.42 (m, 6H), 2.13 (dd,  $J = 13.4, 8.2$  Hz, 1H), 0.93 (s, 9H).  $^{13}\text{C}$  NMR (101 MHz,  $\text{CDCl}_3$ )  $\delta$  172.15, 171.88, 170.81, 160.83, 152.38, 151.07, 150.29, 149.71, 148.47, 139.11, 138.15, 131.58, 130.91, 130.53 (q,  $J = 34.34$  Hz), 129.49, 129.24, 128.71, 128.10, 127.80 (q,  $J = 32.32$  Hz), 126.45, 125.95, 124.71 (d,  $J = 24.24$  Hz), 123.21, 122.00 (d,  $J = 22.22$  Hz), 117.42, 113.07, 112.26, 101.59, 77.23, 70.52, 70.38, 70.11, 69.43, 67.12, 66.25, 58.28, 57.72, 56.68, 56.100, 43.22, 40.32, 36.62, 35.89, 34.71, 26.40, 16.07. HRMS

(ESI) calculated for  $C_{51}H_{59}F_6N_6O_{10}S$   $[M + H]^+$ : 1061.3912, found 1061.3887. HPLC analysis: MeOH : H<sub>2</sub>O (85 : 15), 10.36 min, 95.08% purity.

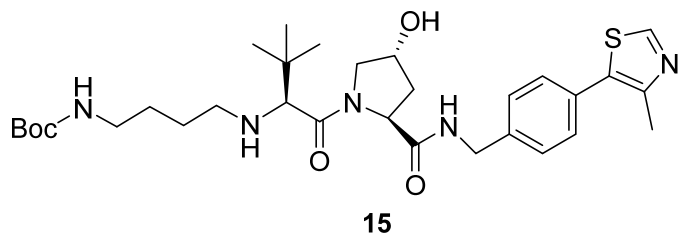

**Tert-butyl(5-(((S)-1-((2S,4R)-4-hydroxy-2-((4-(4-methylthiazol-5-yl)benzyl)carbamoyl)pyrrolidin-1-yl)-3,3-dimethyl-1-oxobutan-2-yl)amino)-5-oxopentyl)carbamate (15).**

HATU (133 mg, 0.35 mmol, 1.5 eq), DIPEA (0.20 mL, 1.2 mmol, 5 eq) and **13** (100 mg, 0.23 mmol, 1 eq) was added to a solution of 5-((tert-butoxycarbonyl)amino)pentanoic acid (61 mg, 0.28 mmol, 1.2 eq) in dry DMF (2 mL). After being stirred for 1 h at RT, the resulting mixture was extracted with ethyl acetate and saturated NaHCO<sub>3</sub>. The organic layer was separated, washed with brine, dried with Na<sub>2</sub>SO<sub>4</sub>. After filtration and evaporation, the residue was purified by silica gel column chromatography (DCM / MeOH=20 : 1) to give **15** (89 mg, 0.15 mmol, 65% yield) as white solid: <sup>1</sup>H NMR (400 MHz, CDCl<sub>3</sub>)  $\delta$  8.68 (s, 1H), 7.40 – 7.32 (m, 5H), 6.33 (d,  $J$  = 8.3 Hz, 1H), 4.72 (t,  $J$  = 7.9 Hz, 2H), 4.62 – 4.49 (m, 3H), 4.33 (dd,  $J$  = 15.0, 5.2 Hz, 1H), 4.10 (d,  $J$  = 9.9 Hz, 1H), 3.60 (d,  $J$  = 8.5 Hz, 1H), 3.08 (d,  $J$  = 6.0 Hz, 2H), 2.51 (s, 4H), 2.26 – 2.11 (m, 3H), 1.59 (d,  $J$  = 15.0 Hz, 2H), 1.48 – 1.39 (m, 12H), 0.93 (s, 9H).

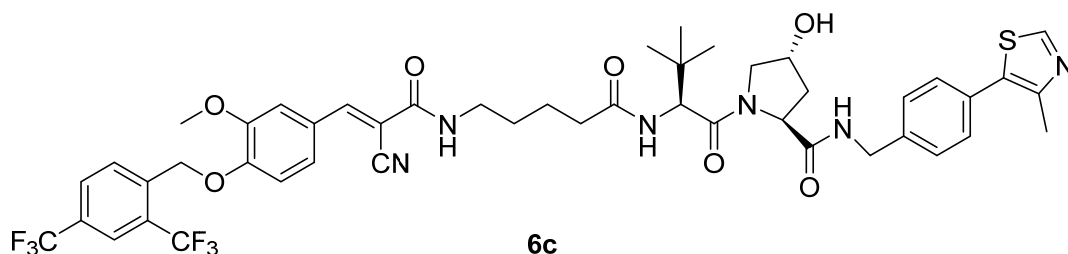

**(2S,4R)-1-(((S)-2-((4-((E)-3-(4-((2,4-bis(trifluoromethyl)benzyl)oxy)-3-methoxyphenyl)-2-cyanoacrylamido)butyl)amino)-3,3-dimethylbutanoyl)-4-hydroxy-N-(4-(4-methylthiazol-5-yl)benzyl)pyrrolidine-2-carboxamide (6c).**

TFA (1 mL) was added to a solution of Compound **15** (80 mg, 0.13 mmol, 1 eq) in

DCM (2 mL). After being stirred for 1 h, the solvents were removed in vacuo, and residual TFA was removed by the addition and evaporation of toluene (3 x 3mL). The crude product was used to next step without further purification. HATU (76 mg, 0.20 mmol, 1.5 eq), DIPEA (110  $\mu$ L, 0.65 mmol, 5 eq) and **4a** (73 mg, 0.16 mmol, 1.2 eq) was added to a solution of the crude product obtained above (1.0 eq) in DMF (2 ml) at 25  $^{\circ}$ C. After being stirred for 1 h, the resulting mixture was extracted with ethyl acetate and saturated NaHCO<sub>3</sub>. The organic layer was separated, washed with brine, dried with Na<sub>2</sub>SO<sub>4</sub>. After filtration and evaporation, the residue was purified by silica gel column chromatography (MeOH : CH<sub>2</sub>Cl<sub>2</sub> =4 : 96) to give **6c** (81 mg, 0.085 mmol, 65%) as white solid:  $[\alpha]_{25}^D$  -22.39 $^{\circ}$  (*c* 0.134, MeOH). <sup>1</sup>H NMR (400 MHz, CDCl<sub>3</sub>)  $\delta$  8.69 (s, 1H), 8.22 (s, 1H), 7.97 (d, *J* = 6.8 Hz, 2H), 7.87 (d, *J* = 8.2 Hz, 1H), 7.71 (d, *J* = 2.0 Hz, 1H), 7.41 – 7.31 (m, 6H), 6.91 – 6.80 (m, 2H), 6.31 (d, *J* = 5.8 Hz, 1H), 5.45 (d, *J* = 14.3 Hz, 2H), 4.74 (t, *J* = 8.0 Hz, 1H), 4.62 – 4.53 (m, 3H), 4.35 (dd, *J* = 15.0, 5.3 Hz, 1H), 4.15 (d, *J* = 11.2 Hz, 1H), 3.98 (s, 3H), 3.64 (dd, *J* = 11.3, 3.3 Hz, 1H), 3.57 – 3.30 (m, 3H), 2.52 (s, 4H), 2.29 (dt, *J* = 15.0, 7.5 Hz, 2H), 2.17 (dd, *J* = 13.4, 8.0 Hz, 1H), 1.70 (dd, *J* = 13.4, 6.7 Hz, 2H), 1.66 – 1.56 (m, 2H), 0.94 (s, 9H). <sup>13</sup>C NMR (101 MHz, CDCl<sub>3</sub>)  $\delta$  171.79, 171.66, 170.92, 161.10, 152.71, 151.14, 150.28, 149.70, 148.43, 139.06, 138.15, 131.57, 130.88, 130.55 (q, *J* = 33.00 Hz), 129.41, 129.25, 128.71, 128.03, 127.80 (q, *J* = 32.32 Hz), 126.44, 125.88, 124.71 (d, *J* = 25.25 Hz), 123.24, 122.00 (d, *J* = 23.23 Hz), 117.49, 113.05, 112.28, 101.46, 77.24, 70.19, 69.22, 66.84, 66.26 (q, *J* = 23.23 Hz), 58.48, 57.44, 56.92, 56.07, 43.16, 40.79, 36.58, 36.04, 35.38, 26.41, 16.06. HRMS (ESI<sup>+</sup>): calculated for C<sub>47</sub>H<sub>51</sub>F<sub>6</sub>N<sub>6</sub>O<sub>7</sub>S [M + H]<sup>+</sup>: 957.3439, found 957.3435. HPLC analysis: MeOH: H<sub>2</sub>O (85 : 15), 10.69 min, 96.40 % purity.

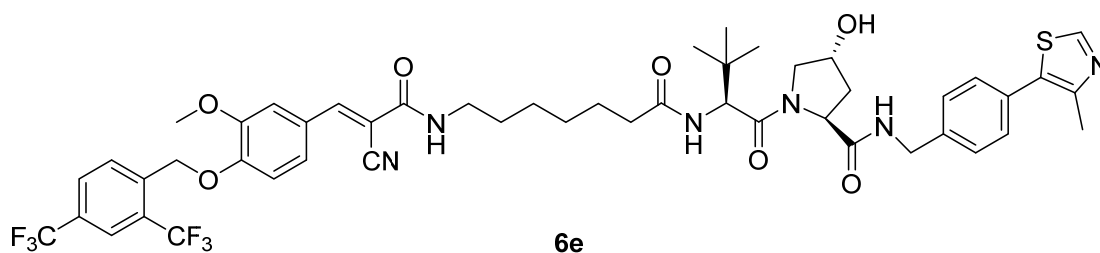

**(2*S*,4*R*)-1-((*S*)-2-(7-((*E*)-3-(4-((2,4-bis(trifluoromethyl)benzyl)oxy)-3-methoxyphe**

nyl)-2-cyanoacrylamido)heptanamido)-3,3-dimethylbutanoyl)-4-hydroxy-*N*-(4-(4-methylthiazol-5-yl)benzyl)pyrrolidine-2-carboxamid (6e). Compound 6e was synthesized from 7-((tert-butoxycarbonyl)amino)heptanoic acid with similar procedure to that of 6c.

Yield: 71%. <sup>1</sup>H NMR (400 MHz, CDCl<sub>3</sub>) δ 8.67 (s, 1H), 8.17 (s, 1H), 7.95 (d, *J* = 5.9 Hz, 2H), 7.85 (d, *J* = 8.2 Hz, 1H), 7.69 (d, *J* = 1.5 Hz, 1H), 7.41 – 7.31 (m, 6H), 6.86 (d, *J* = 8.4 Hz, 1H), 6.44 (t, *J* = 5.4 Hz, 1H), 6.18 (d, *J* = 8.7 Hz, 1H), 5.45 (s, 2H), 4.73 (t, *J* = 8.0 Hz, 1H), 4.60-4.50 (m, 3H), 4.34 (dd, *J* = 15.0, 5.2 Hz, 1H), 4.12 (d, *J* = 11.4 Hz, 1H), 3.97 (s, 3H), 3.60 (dd, *J* = 11.3, 3.1 Hz, 1H), 3.49 – 3.34 (m, 3H), 2.50 (s, 4H), 2.27 – 2.11 (m, 3H), 1.60 (dd, *J* = 13.9, 7.0 Hz, 4H), 1.33 (d, *J* = 4.6 Hz, 4H), 0.93 (s, 9H). <sup>13</sup>C NMR (101 MHz, CDCl<sub>3</sub>) δ 173.74, 171.92, 170.76, 160.66, 152.30, 151.09, 150.30, 149.72, 148.47, 139.10, 138.09, 131.56, 130.96, 130.54 (q, *J* = 33.33Hz), 129.51, 129.25, 128.71, 128.08, 127.80 (q, *J* = 33.33 Hz), 126.51, 125.91, 124.71 (d, *J* = 24.24 Hz), 123.22, 122.00 (q, *J* = 22.22 Hz), 117.64, 113.04, 112.12, 101.45, 77.23, 70.05, 66.24, 58.45, 57.48, 56.80, 56.09, 43.24, 40.34, 36.18, 35.90, 34.83, 29.71, 29.05, 28.35, 26.42, 26.23, 25.26, 16.07. HRMS (ESI<sup>+</sup>): calculated for C<sub>49</sub>H<sub>55</sub>F<sub>6</sub>N<sub>6</sub>O<sub>7</sub>S [M + H]<sup>+</sup>: 985.3752, found 985.3723. HPLC analysis: MeOH : H<sub>2</sub>O (85 : 15), 12.65 min, 95.80 % purity.

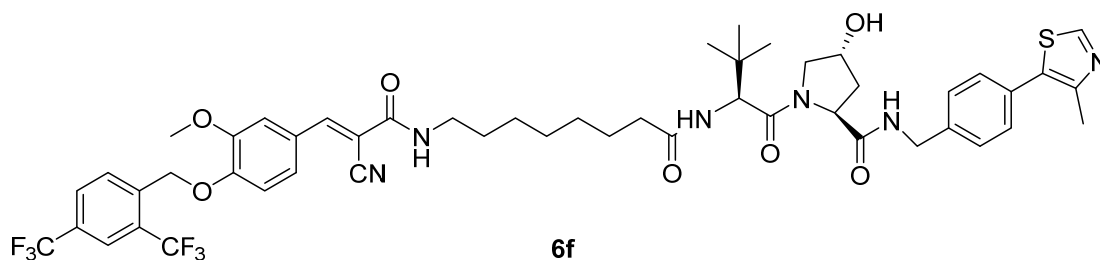

(2*S*,4*R*)-1-((*S*)-2-(8-((*E*)-3-(4-((2,4-bis(trifluoromethyl)benzyl)oxy)-3-methoxyphenyl)-2-cyanoacrylamido)octanamido)-3,3-dimethylbutanoyl)-4-hydroxy-*N*-(4-(4-methylthiazol-5-yl)benzyl)pyrrolidine-2-carboxamide (6f). Compound 6f was synthesized from 8-((tert-butoxycarbonyl)amino)octanoic acid with similar procedure to that of 6c.

Yield: 50%. <sup>1</sup>H NMR (400 MHz, CDCl<sub>3</sub>) δ 8.67 (s, 1H), 8.20 (s, 1H), 7.95 (d, *J* = 6.8 Hz, 2H), 7.85 (d, *J* = 8.2 Hz, 1H), 7.70 (d, *J* = 2.0 Hz, 1H), 7.40 – 7.31 (m, 6H), 6.86

(d,  $J = 8.5$  Hz, 1H), 6.41 (t,  $J = 5.7$  Hz, 1H), 6.17 (d,  $J = 8.8$  Hz, 1H), 5.45 (s, 2H), 4.72 (t,  $J = 8.0$  Hz, 1H), 4.60 – 4.50 (m, 3H), 4.33 (dd,  $J = 15.0, 5.2$  Hz, 1H), 4.11 (d,  $J = 10.9$  Hz, 1H), 3.97 (s, 3H), 3.60 (dd,  $J = 11.4, 3.5$  Hz, 1H), 3.39 (dd,  $J = 13.4, 6.7$  Hz, 3H), 2.57 – 2.46 (m, 4H), 2.24 – 2.09 (m, 3H), 1.58 (dd,  $J = 14.1, 7.2$  Hz, 4H), 1.32 (d,  $J = 3.4$  Hz, 6H), 0.93 (s, 9H).  $^{13}\text{C}$  NMR (100 MHz,  $\text{CDCl}_3$ )  $\delta$  173.83, 171.92, 170.69, 160.57, 152.32, 151.07, 150.32, 149.72, 148.47, 139.10, 138.07, 131.57, 130.98, 130.54 (q,  $J = 33.33$  Hz), 129.53, 129.22, 128.70, 128.11, 127.80 (q,  $J = 32.32$  Hz), 126.48, 125.94, 124.71 (q,  $J = 24.24$  Hz), 123.22, 122.00 (q,  $J = 22.22$  Hz), 117.67, 113.06, 112.16, 101.47, 77.23, 70.06, 58.44, 57.44, 56.76, 56.10, 43.26, 40.56, 36.30, 35.81, 34.83, 29.71, 29.21, 28.77, 28.71, 26.55, 26.41, 25.32, 16.06. HRMS (ESI<sup>+</sup>): calculated for  $\text{C}_{50}\text{H}_{57}\text{F}_6\text{N}_6\text{O}_7\text{S}$  [ $\text{M} + \text{H}$ ]<sup>+</sup>: 999.3908, found 999.3888. HPLC analysis: MeOH : H<sub>2</sub>O (85 : 15), 14.56 min, 95.60 % purity.

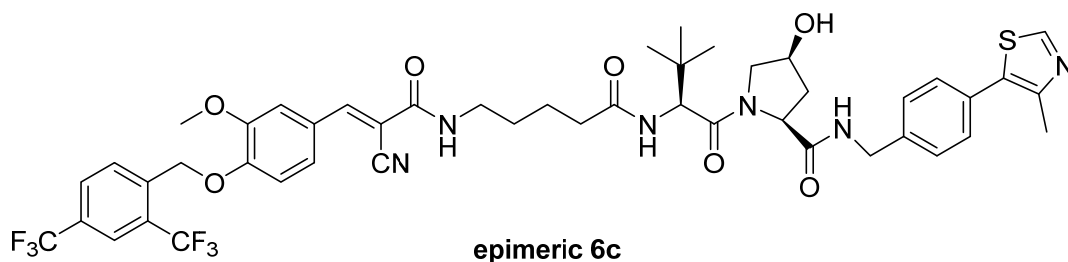

**(2*S*,4*S*)-1-((*S*)-2-(5-((*E*)-3-(4-((2,4-bis(trifluoromethyl)benzyl)oxy)-3-methoxyphenyl)-2-cyanoacrylamido)pentanamido)-3,3-dimethylbutanoyl)-4-hydroxy-*N*-(4-(4-methylthiazol-5-yl)benzyl)pyrrolidine-2-carboxamide (epimeric 6c).** Compound epimeric 6c was synthesized from epimeric 10 with similar procedure to that of 6c.

Yield: 64%.  $[\alpha]_{25}^{\text{D}} -17.39^\circ$  ( $c$  0.115, MeOH).  $^1\text{H}$  NMR (400 MHz,  $\text{CDCl}_3$ )  $\delta$  8.67 (s, 1H), 8.20 (s, 1H), 7.95 (d,  $J = 5.9$  Hz, 2H), 7.84 (d,  $J = 8.2$  Hz, 1H), 7.70 (d,  $J = 1.6$  Hz, 1H), 7.50 (s, 1H), 7.35 (q,  $J = 8.6$  Hz, 5H), 6.86 (d,  $J = 8.5$  Hz, 1H), 6.59 (s, 1H), 6.08 (d,  $J = 8.4$  Hz, 1H), 5.54 (d,  $J = 9.9$  Hz, 1H), 5.44 (s, 2H), 4.72 (d,  $J = 8.9$  Hz, 1H), 4.63 (dd,  $J = 14.9, 7.0$  Hz, 1H), 4.53–4.44 (m, 2H), 4.29 (dd,  $J = 14.9, 5.0$  Hz, 1H), 3.96 (s, 4H), 3.80 (d,  $J = 10.9$  Hz, 1H), 3.41 (dd,  $J = 6.1, 2.8$  Hz, 2H), 2.50 (s, 3H), 2.34 (d,  $J = 14.1$  Hz, 1H), 2.27 (dd,  $J = 13.3, 7.0$  Hz, 2H), 2.23–2.15 (m, 1H), 1.69 (dd,  $J = 14.4, 7.2$  Hz, 2H), 1.62 (dd,  $J = 13.8, 6.8$  Hz, 2H), 0.92 (s, 9H).  $^{13}\text{C}$

NMR (101 MHz, CDCl<sub>3</sub>)  $\delta$  172.75, 172.57, 172.23, 160.72, 152.39, 151.12, 150.36, 149.73, 148.55, 139.07, 137.32, 131.45, 131.25, 130.55 (q,  $J$  = 33.33 Hz), 129.62, 129.25, 128.71, 128.14, 127.80 (q,  $J$  = 32.32 Hz), 126.51, 125.90, 124.70 (d,  $J$  = 24.24 Hz), 123.24, 122.00 (d,  $J$  = 23.23 Hz), 117.61, 113.06, 112.12, 101.41, 77.24, 71.13, 66.25, 59.90, 58.64, 57.16, 56.08, 43.49, 39.75, 35.47, 35.11, 34.79, 28.83, 26.36, 22.32, 16.08. HRMS (ESI<sup>+</sup>): calculated for C<sub>47</sub>H<sub>51</sub>F<sub>6</sub>N<sub>6</sub>O<sub>7</sub>S [M + H]<sup>+</sup>: 957.3439, found 957.3423. HPLC analysis: MeOH : H<sub>2</sub>O (85 : 15), 8.97 min, 98.90 % purity.

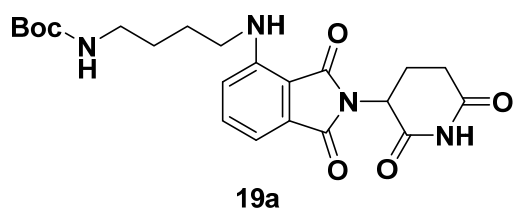

**Tert-butyl(4-((2-(2,6-dioxopiperidin-3-yl)-1,3-dioxisoindolin-4-yl)amino)butyl)carbamate (19a). General procedure for syntheses of 19b-19h.**

To a solution of **17** (276.2 mg, 1 mmol, 1 eq) in DMF (3 mL), **18a** (188.3 mg, 1 mmol, 1 eq) and DIPEA (258.5 mg, 2 mmol, 2 eq) were added and stirred at 90 °C for 8 h. After cooling to room temperature, the resulting mixture was extracted with ethyl acetate and H<sub>2</sub>O. The organic layer was separated, washed with brine, dried with Na<sub>2</sub>SO<sub>4</sub>. After filtration and evaporation, the residue was purified by silica gel column chromatography (PE / EA = 1 : 1 to MeOH / DCM = 2.5 %) to afford **19a** as yellow oil (201 mg, 0.45 mmol, 45%): <sup>1</sup>H NMR (400 MHz, CDCl<sub>3</sub>)  $\delta$  8.01 (s, 1H), 7.48 (dd,  $J$  = 8.3, 7.3 Hz, 1H), 7.08 (d,  $J$  = 7.0 Hz, 1H), 6.88 (d,  $J$  = 8.5 Hz, 1H), 6.23 (t,  $J$  = 5.6 Hz, 1H), 4.91 (dd,  $J$  = 12.1, 5.4 Hz, 1H), 4.60 (s, 1H), 3.29 (dd,  $J$  = 12.8, 6.6 Hz, 2H), 3.21 – 3.13 (m, 2H), 2.91 – 2.83 (m, 1H), 2.76 (ddd,  $J$  = 19.3, 14.3, 4.3 Hz, 2H), 2.17 – 2.09 (m, 1H), 1.73 – 1.65 (m, 2H), 1.60 (tt,  $J$  = 12.7, 6.3 Hz, 2H), 1.43 (s, 9H).

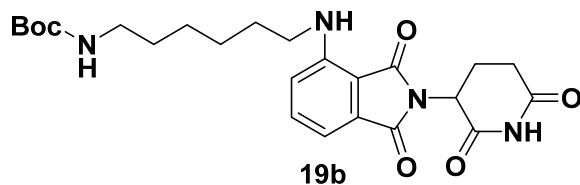

**Tert-butyl(6-((2-(2,6-dioxopiperidin-3-yl)-1,3-dioxisoindolin-4-yl)amino)hexyl)carbamate (19b).**

Yield: 34%.  $^1\text{H}$  NMR (400 MHz,  $\text{CDCl}_3$ )  $\delta$  8.55 (s, 1H), 7.53 – 7.42 (m, 1H), 7.06 (d,  $J = 7.1$  Hz, 1H), 6.85 (d,  $J = 8.5$  Hz, 1H), 6.21 (t,  $J = 5.5$  Hz, 1H), 4.93 – 4.87 (m, 1H), 4.58 (s, 1H), 3.24 (dd,  $J = 12.8, 6.9$  Hz, 2H), 3.09 (d,  $J = 6.0$  Hz, 4H), 2.88 – 2.81 (m, 1H), 2.78 – 2.68 (m, 2H), 2.10 (dt,  $J = 8.9, 3.8$  Hz, 1H), 1.69 – 1.59 (m, 2H), 1.52 – 1.45 (m, 2H), 1.42 (s, 9H), 1.38 – 1.31 (m, 2H).

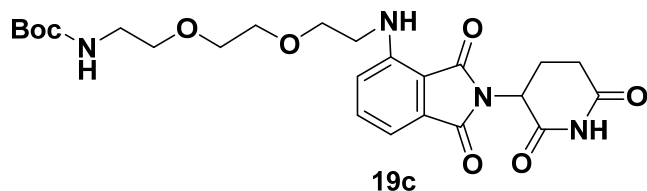

**Tert-butyl(2-(2-(2-((2-(2,6-dioxopiperidin-3-yl)-1,3-dioxoisindolin-4-yl)amino)ethoxy)ethoxy)ethyl)carbamate (19c).**

Yield: 49%.  $^1\text{H}$  NMR (400 MHz,  $\text{CDCl}_3$ )  $\delta$  8.53 (s, 1H), 7.49 (dd,  $J = 8.3, 7.4$  Hz, 1H), 7.10 (d,  $J = 7.1$  Hz, 1H), 6.90 (d,  $J = 8.5$  Hz, 1H), 6.51 (s, 1H), 5.08 (s, 1H), 4.91 (dd,  $J = 11.7, 5.1$  Hz, 1H), 3.72 (t,  $J = 5.3$  Hz, 2H), 3.65 (s, 4H), 3.56 (t,  $J = 5.1$  Hz, 2H), 3.47 (dd,  $J = 10.5, 5.3$  Hz, 2H), 3.32 (dd,  $J = 10.3, 5.2$  Hz, 2H), 2.90 – 2.83 (m, 1H), 2.81 – 2.69 (m, 2H), 2.16 – 2.09 (m, 1H), 1.42 (s, 9H).

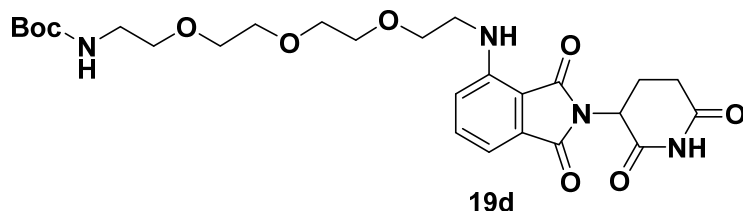

**Tert-butyl(2-(2-(2-(2-((2-(2,6-dioxopiperidin-3-yl)-1,3-dioxoisindolin-4-yl)amino)ethoxy)ethoxy)ethoxy)ethyl)carbamate (19d).**

Yield: 46%.  $^1\text{H}$  NMR (400 MHz,  $\text{CDCl}_3$ )  $\delta$  8.29 (s, 1H), 7.49 (dd,  $J = 8.3, 7.3$  Hz, 1H), 7.10 (d,  $J = 7.0$  Hz, 1H), 6.92 (d,  $J = 8.5$  Hz, 1H), 6.49 (t,  $J = 5.3$  Hz, 1H), 5.07 (d,  $J = 3.1$  Hz, 1H), 4.92 (dd,  $J = 12.1, 5.4$  Hz, 1H), 3.72 (t,  $J = 5.4$  Hz, 2H), 3.69 – 3.59 (m, 8H), 3.53 (t,  $J = 5.0$  Hz, 2H), 3.47 (dd,  $J = 10.9, 5.5$  Hz, 2H), 3.35 – 3.28 (m, 2H), 2.91 – 2.84 (m, 1H), 2.77 (ddd,  $J = 19.3, 14.3, 4.3$  Hz, 2H), 2.18 – 2.08 (m, 1H), 1.43 (s, 9H), 0.86 (ddd,  $J = 11.1, 7.6, 4.7$  Hz, 1H).

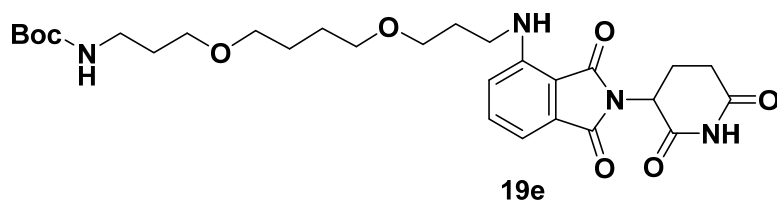

**Tert-butyl(3-(4-(3-((2-(2,6-dioxopiperidin-3-yl)-1,3-dioxoisindolin-4-yl)amino)propoxy)butoxy)propyl)carbamate (19e).**

Yield: 50%. <sup>1</sup>H NMR (400 MHz, CDCl<sub>3</sub>) δ 8.23 (s, 1H), 7.48 (dd, *J* = 8.4, 7.3 Hz, 1H), 7.11 – 7.03 (m, 1H), 6.91 (d, *J* = 8.6 Hz, 1H), 6.45 (s, 1H), 4.98 – 4.86 (m, 2H), 3.53 (t, *J* = 5.8 Hz, 2H), 3.43 (tt, *J* = 18.9, 6.4 Hz, 8H), 3.26 – 3.18 (m, 2H), 3.10 (s, 1H), 2.96 – 2.85 (m, 1H), 2.82 – 2.65 (m, 2H), 2.13 (ddd, *J* = 9.4, 7.3, 4.3 Hz, 1H), 1.96 – 1.86 (m, 2H), 1.73 (dd, *J* = 12.2, 6.0 Hz, 2H), 1.70 – 1.66 (m, 2H), 1.43 (s, 9H), 0.86 (ddd, *J* = 11.0, 7.7, 4.7 Hz, 1H).

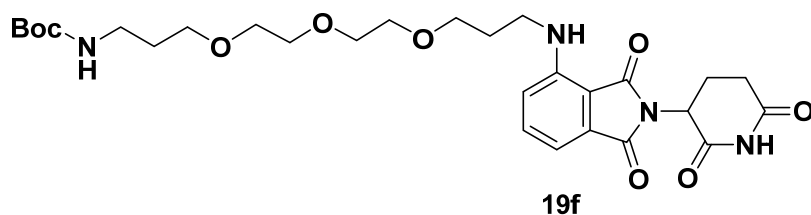

**Tert-butyl(3-(2-(2-(3-((2-(2,6-dioxopiperidin-3-yl)-1,3-dioxoisindolin-4-yl)amino)propoxy)ethoxy)ethoxy)propyl)carbamate (19f).**

Yield: 40%. <sup>1</sup>H NMR (400 MHz, CDCl<sub>3</sub>) δ 8.31 (s, 1H), 7.49 (dd, *J* = 8.3, 7.3 Hz, 1H), 7.10 (d, *J* = 7.1 Hz, 1H), 6.92 (d, *J* = 8.5 Hz, 1H), 6.50 (t, *J* = 5.4 Hz, 1H), 5.14 (s, 1H), 4.91 (dd, *J* = 12.1, 5.4 Hz, 1H), 3.72 (t, *J* = 5.4 Hz, 2H), 3.69 – 3.64 (m, 8H), 3.63 – 3.59 (m, 4H), 3.53 (t, *J* = 5.0 Hz, 2H), 3.47 (q, *J* = 5.5 Hz, 2H), 3.30 (d, *J* = 4.9 Hz, 2H), 2.87 (ddd, *J* = 11.3, 8.9, 4.2 Hz, 1H), 2.75 (tdd, *J* = 17.4, 12.9, 4.2 Hz, 2H), 2.12 (ddd, *J* = 9.4, 5.7, 3.0 Hz, 1H), 1.43 (s, 9H).

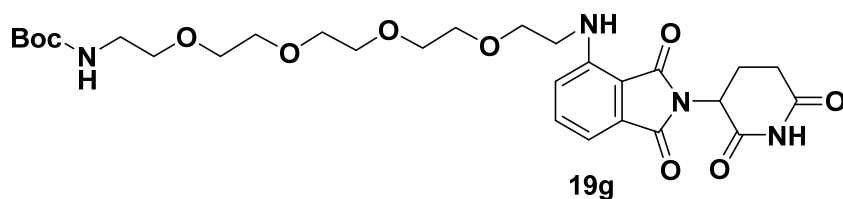



**Tert-butyl(14-((2-(2,6-dioxopiperidin-3-yl)-1,3-dioxoisindolin-4-yl)amino)-3,6,9,12-tetraoxatetradecyl)carbamate (19g).**

Yield: 33%. <sup>1</sup>H NMR (400 MHz, CDCl<sub>3</sub>) δ 8.24 (s, 1H), 7.48 (dd, *J* = 8.4, 7.3 Hz, 1H), 7.08 (d, *J* = 7.0 Hz, 1H), 6.93 (d, *J* = 8.6 Hz, 1H), 6.44 (t, *J* = 5.4 Hz, 1H), 4.97 (s, 1H), 4.90 (dd, *J* = 12.1, 5.4 Hz, 1H), 3.70 – 3.67 (m, 2H), 3.65 – 3.56 (m, 9H), 3.53 (t, *J* = 6.0 Hz, 2H), 3.40 (q, *J* = 6.4 Hz, 2H), 3.21 (d, *J* = 6.0 Hz, 2H), 2.91 – 2.82 (m, 1H), 2.76 (ddd, *J* = 19.6, 14.2, 4.4 Hz, 2H), 2.12 (ddd, *J* = 9.4, 5.6, 3.0 Hz, 1H), 1.97 – 1.89 (m, 2H), 1.75 (dd, *J* = 12.4, 6.2 Hz, 2H), 1.43 (s, 9H).

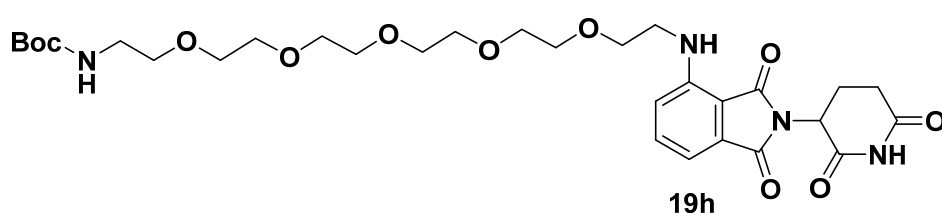

**Tert-butyl(17-((2-(2,6-dioxopiperidin-3-yl)-1,3-dioxoisindolin-4-yl)amino)-3,6,9,12,15-pentaoxaheptadecyl)carbamate (19h).**

Yield: 32%. <sup>1</sup>H NMR (400 MHz, CDCl<sub>3</sub>) δ 8.42 (s, 1H), 7.49 (t, *J* = 7.8 Hz, 1H), 7.10 (d, *J* = 7.1 Hz, 1H), 6.91 (d, *J* = 8.5 Hz, 1H), 6.49 (t, *J* = 5.2 Hz, 1H), 5.17 (s, 1H), 4.91 (dd, *J* = 12.0, 5.3 Hz, 1H), 3.71 (t, *J* = 5.3 Hz, 2H), 3.69 – 3.59 (m, 16H), 3.52 (t, *J* = 4.8 Hz, 2H), 3.46 (dd, *J* = 10.8, 5.4 Hz, 2H), 3.30 (d, *J* = 5.0 Hz, 2H), 2.86 (dd, *J* = 13.9, 10.6 Hz, 1H), 2.76 (td, *J* = 14.8, 3.8 Hz, 2H), 2.18 – 2.07 (m, 1H), 1.43 (s, 9H).

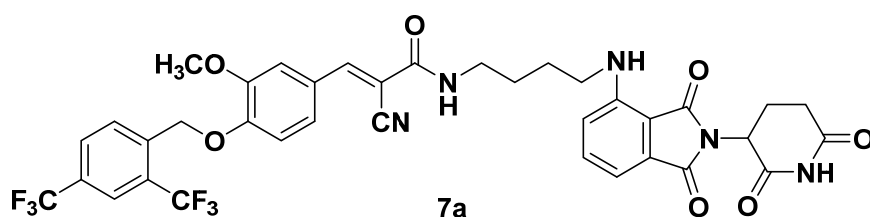

**(*E*)-3-(4-((2,4-bis(trifluoromethyl)benzyl)oxy)-3-methoxyphenyl)-2-cyano-N-(4-((2-(2,6-dioxopiperidin-3-yl)-1,3-dioxoisindolin-4-yl)amino)butyl)acrylamide(7a).**

**General procedure for syntheses of 7b-7h.**

TFA (2 mL) was added to a solution of Compound **19a** (150 mg, 0.34 mmol, 1 eq) in DCM (4 mL). After being stirred for 1 h, the solvents were removed in vacuo, and residual TFA was removed by the addition and evaporation of toluene (3 x 3mL). The

crude product was used to next step without further purification. HATU (194 mg, 0.51 mmol, 1.5 eq), DIPEA (220 mg, 1.7 mmol, 5 eq) and **4a** (151.4 mg, 0.34 mmol, 1 eq) was added to a solution of the crude product obtained above in DMF (3 ml) at 25 °C. After being stirred for 1 h, the resulting mixture was extracted with ethyl acetate and saturated NaHCO<sub>3</sub>. The organic layer was separated, washed with brine, dried with Na<sub>2</sub>SO<sub>4</sub>. After filtration and evaporation, the residue was purified by silica gel column chromatography (MeOH : CH<sub>2</sub>Cl<sub>2</sub> = 2.5 : 100) to give **7a** (115 mg, 0.15 mmol, 44%) as yellow solid: <sup>1</sup>H NMR (400 MHz, DMSO) δ 11.09 (s, 1H), 8.39 (t, *J* = 5.6 Hz, 1H), 8.18 (d, *J* = 8.1 Hz, 1H), 8.10 (s, 2H), 8.03 (d, *J* = 8.1 Hz, 1H), 7.71 (d, *J* = 1.9 Hz, 1H), 7.57 (ddd, *J* = 8.3, 4.5, 2.5 Hz, 2H), 7.23 (d, *J* = 8.6 Hz, 1H), 7.12 (d, *J* = 8.6 Hz, 1H), 7.01 (d, *J* = 7.0 Hz, 1H), 6.58 (t, *J* = 5.9 Hz, 1H), 5.44 (s, 2H), 5.05 (dd, *J* = 12.9, 5.3 Hz, 1H), 3.83 (s, 3H), 3.33 (s, 2H), 3.26 (d, *J* = 5.4 Hz, 2H), 2.93 – 2.83 (m, 2H), 2.73 (s, 1H), 2.69 (s, 2H), 2.63 – 2.51 (m, 2H), 2.08 – 1.96 (m, 1H). <sup>13</sup>C NMR (101 MHz, DMSO) δ 173.27, 170.56, 169.38, 167.75, 162.75, 161.58, 151.00, 150.67, 149.42, 146.85, 139.86, 136.72, 132.68, 131.61, 130.44, 129.77 (q, *J* = 33.33 Hz), 128.11 (q, *J* = 32.32 Hz), 126.00, 125.39, 125.13, 123.63, 122.45, 117.57 (d, *J* = 23.23 Hz), 113.90, 113.37, 110.86, 109.50, 103.91, 66.63, 56.12, 49.00, 41.97, 38.71, 36.25, 31.45, 26.70 (d, *J* = 17.17 Hz), 22.63. HRMS (ESI) calculated for C<sub>37</sub>H<sub>32</sub>F<sub>6</sub>N<sub>5</sub>O<sub>7</sub> [M + H]<sup>+</sup>: 772.2200, found 772.2200. HPLC analysis: MeOH : H<sub>2</sub>O (85 : 15), 9.35 min, 100% purity.

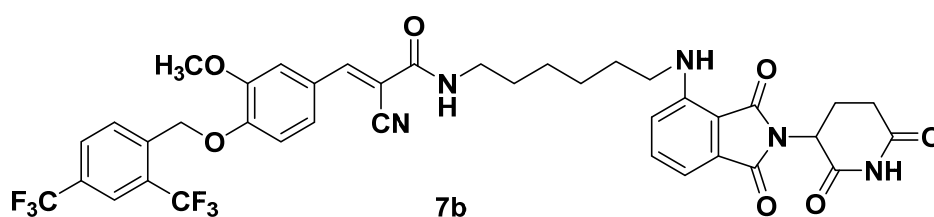

**(E) -3-(4-((2,4-bis(trifluoromethyl)benzyl)oxy)-3-methoxyphenyl)-2-cyano-N-(6-(2-(2,6-dioxopiperidin-3-yl)-1,3-dioxoisindolin-4-yl)amino)hexyl)acrylamide(7b)**  
 Yield: 48%. <sup>1</sup>H NMR (400 MHz, CDCl<sub>3</sub>) δ 8.23 (s, 2H), 7.94 (d, *J* = 8.1 Hz, 2H), 7.84 (d, *J* = 8.2 Hz, 1H), 7.70 (s, 1H), 7.48 (t, *J* = 7.8 Hz, 1H), 7.40 (dd, *J* = 8.5, 1.9 Hz, 1H), 7.08 (d, *J* = 7.0 Hz, 1H), 6.87 (dd, *J* = 8.4, 3.9 Hz, 2H), 6.41 (s, 1H), 6.23 (t, *J* = 5.4 Hz, 1H), 5.46 (s, 2H), 4.92 (dd, *J* = 12.0, 5.3 Hz, 1H), 3.98 (s, 3H), 3.41 (dd, *J* =

13.2, 6.6 Hz, 2H), 3.27 (dd,  $J = 12.3, 6.1$  Hz, 2H), 2.92 (dt,  $J = 12.7, 4.7$  Hz, 1H), 2.82 – 2.66 (m, 2H), 2.17 – 2.08 (m, 1H), 1.69 (d,  $J = 6.0$  Hz, 2H), 1.65 – 1.57 (m, 2H), 1.44 (s, 4H).  $^{13}\text{C}$  NMR (101 MHz,  $\text{CDCl}_3$ )  $\delta$  171.32, 169.29, 168.60, 167.61, 160.82, 152.35, 150.95, 149.57, 146.73, 136.00, 132.47, 130.50 (q,  $J = 33.33$ ), 129.24, 128.68, 127.77 (q,  $J = 32.32$ ), 126.42, 125.90, 124.71 (d,  $J = 23.23$  Hz), 121.99 (d,  $J = 22.22$  Hz), 117.54, 116.75, 112.92, 112.24, 111.61, 110.26, 101.41, 77.26, 70.77, 70.43, 69.40, 69.29, 66.19, 56.09, 48.85, 42.27, 40.32, 31.41, 22.88. HRMS (ESI) calculated for  $\text{C}_{39}\text{H}_{36}\text{F}_6\text{N}_5\text{O}_7$   $[\text{M} + \text{H}]^+$ : 800.2513, found 800.2502. HPLC analysis: MeOH :  $\text{H}_2\text{O}$  (85 : 15), 11.66 min, 97.92% purity.

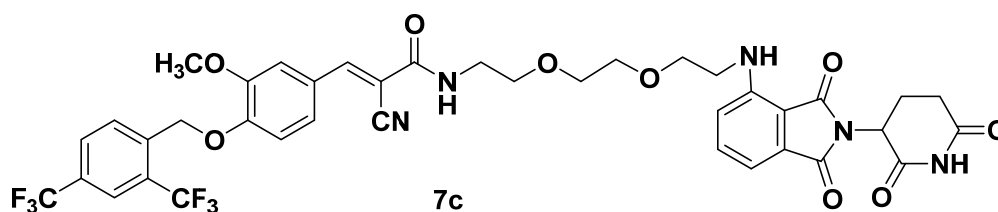

**(*E*)-3-(4-((2,4-bis(trifluoromethyl)benzyl)oxy)-3-methoxyphenyl)-2-cyano-*N*-(2-(2-(2-(2,6-dioxopiperidin-3-yl)-1,3-dioxoisindolin-4-yl)amino)ethoxy)ethoxy)ethyl)acrylamide (7c).**

Yield: 54%.  $^1\text{H}$  NMR (400 MHz,  $\text{CDCl}_3$ )  $\delta$  8.52 (s, 1H), 8.20 (s, 1H), 7.95 (d,  $J = 8.0$  Hz, 2H), 7.85 (d,  $J = 8.4$  Hz, 1H), 7.67 (d,  $J = 2.0$  Hz, 1H), 7.44 (dd,  $J = 8.3, 7.3$  Hz, 1H), 7.39 (dd,  $J = 8.5, 2.0$  Hz, 1H), 7.03 (d,  $J = 7.0$  Hz, 1H), 6.93 – 6.83 (m, 3H), 6.54 (t,  $J = 5.4$  Hz, 1H), 5.46 (s, 2H), 4.94 – 4.87 (m, 1H), 3.96 (s, 3H), 3.76 (t,  $J = 5.2$  Hz, 2H), 3.71 – 3.67 (m, 5H), 3.66 – 3.58 (m, 3H), 3.48 (dd,  $J = 10.5, 5.3$  Hz, 2H), 2.92 – 2.79 (m, 1H), 2.72 (qd,  $J = 13.0, 3.9$  Hz, 2H), 2.17 – 2.09 (m, 1H).  $^{13}\text{C}$  NMR (101 MHz,  $\text{CDCl}_3$ )  $\delta$  171.32, 169.29, 168.60, 167.61, 160.82, 152.35, 150.95, 149.57, 146.73, 136.00, 132.47 (s), 130.5 (q,  $J = 33.33$ ), 129.24 (s), 128.68 (s), 127.77 (q,  $J = 32.32$ ), 126.42, 125.90, 124.71 (d,  $J = 23.23$  Hz), 123.21 (s), 122.00 (d,  $J = 22.22$  Hz), 117.54, 116.75, 112.92, 112.24, 111.61, 110.26, 101.41, 77.26, 70.77, 70.43, 69.40, 69.29, 66.19, 56.09, 48.85, 42.27, 40.32, 31.41, 22.88. HRMS (ESI) calculated for  $\text{C}_{39}\text{H}_{36}\text{F}_6\text{N}_5\text{O}_9$   $[\text{M} + \text{H}]^+$ : 832.2412, found 832.2402. HPLC analysis: MeOH :  $\text{H}_2\text{O}$  (85 : 15), 8.30 min, 99.34% purity.

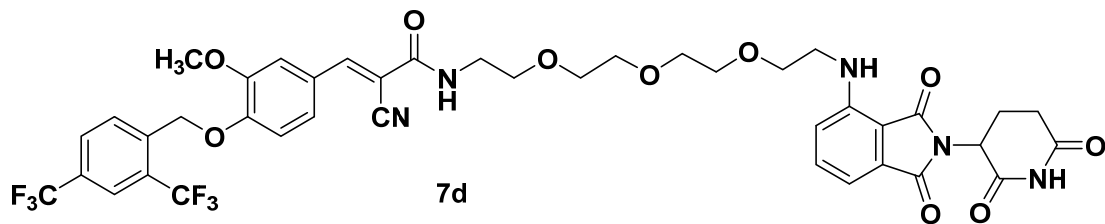

**(E)-3-(4-((2,4-bis(trifluoromethyl)benzyl)oxy)-3-methoxyphenyl)-2-cyano-N-(2-(2-(2-(2-(2,6-dioxopiperidin-3-yl)-1,3-dioxoisindolin-4-yl)amino)ethoxy)ethoxy)ethoxy)ethyl)acrylamide (7d).**

Yield: 35%. <sup>1</sup>H NMR (400 MHz, CDCl<sub>3</sub>) δ 8.40 (s, 1H), 8.21 (s, 1H), 7.95 (d, *J* = 4.9 Hz, 2H), 7.85 (d, *J* = 8.2 Hz, 1H), 7.71 (d, *J* = 2.1 Hz, 1H), 7.46 (dd, *J* = 8.3, 7.3 Hz, 1H), 7.40 (dd, *J* = 8.5, 2.0 Hz, 1H), 7.08 (d, *J* = 6.9 Hz, 1H), 6.93 – 6.84 (m, 3H), 6.49 (t, *J* = 5.5 Hz, 1H), 5.45 (s, 2H), 4.91 (dd, *J* = 12.2, 5.5 Hz, 1H), 3.97 (s, 3H), 3.74 – 3.59 (m, 14H), 3.46 (q, *J* = 5.5 Hz, 2H), 2.86 (ddd, *J* = 11.2, 7.2, 4.6 Hz, 1H), 2.81 – 2.69 (m, 2H), 2.18 – 2.07 (m, 1H). <sup>13</sup>C NMR (101 MHz, CDCl<sub>3</sub>) δ 171.18, 169.25, 168.46, 167.61, 160.82, 152.37, 151.02, 149.68, 146.81, 139.13, 136.01, 132.51, 130.52 (q, *J* = 33.33 Hz), 129.22, 128.71, 127.80 (q, *J* = 32.32 Hz), 126.45, 125.98, 124.71 (d, *J* = 24.24 Hz), 123.21, 120.00 (d, *J* = 23.23 Hz), 117.45, 116.76, 113.06, 112.28, 111.63, 110.28, 101.55, 77.24, 70.83, 70.67, 70.45, 69.44, 69.35, 66.26 (d, *J* = 4.04 Hz), 56.10, 48.87, 42.40, 40.29, 31.43, 22.81. HRMS (ESI) calculated for C<sub>41</sub>H<sub>40</sub>F<sub>6</sub>N<sub>5</sub>O<sub>10</sub> [M + H]<sup>+</sup>: 876.2674, found 876.2645. HPLC analysis: MeOH : H<sub>2</sub>O (85 : 15), 8.53 min, 95.89% purity.

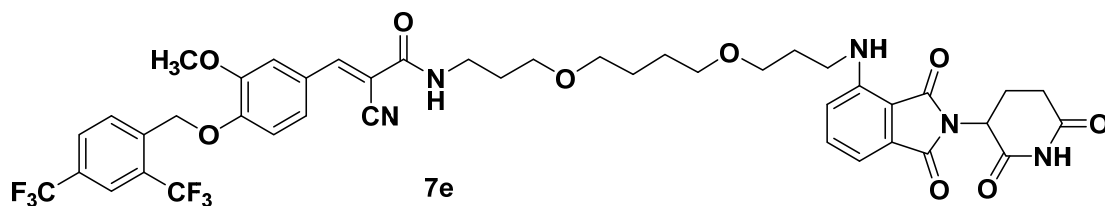

**(E)-3-(4-((2,4-bis(trifluoromethyl)benzyl)oxy)-3-methoxyphenyl)-2-cyano-N-(3-(4-(3-(2-(2,6-dioxopiperidin-3-yl)-1,3-dioxoisindolin-4-yl)amino)propoxy)butoxy)propyl)acrylamide (7e).**

Yield: 41%. <sup>1</sup>H NMR (400 MHz, CDCl<sub>3</sub>) δ 8.33 (s, 1H), 8.24 (s, 1H), 7.97 (d, *J* = 8.6 Hz, 2H), 7.87 (d, *J* = 8.1 Hz, 1H), 7.72 (d, *J* = 1.7 Hz, 1H), 7.53 – 7.46 (m, 1H), 7.42 (dd, *J* = 8.4, 1.8 Hz, 1H), 7.17 (t, *J* = 4.9 Hz, 1H), 7.09 (d, *J* = 7.1 Hz, 1H), 6.92 (d, *J*

= 8.6 Hz, 1H), 6.87 (d,  $J = 8.5$  Hz, 1H), 6.47 (t,  $J = 5.3$  Hz, 1H), 5.47 (s, 2H), 4.92 (dd,  $J = 12.0, 5.4$  Hz, 1H), 3.99 (s, 3H), 3.61 – 3.46 (m, 10H), 3.40 (dd,  $J = 12.4, 6.2$  Hz, 2H), 2.96 – 2.70 (m, 3H), 2.22 – 2.08 (m, 1H), 1.99 – 1.86 (m, 4H), 1.72 (s, 4H).  $^{13}\text{C}$  NMR (101 MHz,  $\text{CDCl}_3$ )  $\delta$  171.13, 169.32, 168.46, 167.67, 160.58, 152.00, 150.82, 149.58, 146.96, 139.13, 136.08, 132.48, 130.48 (q,  $J = 34.34$  Hz), 129.27, 128.67, 127.75 (q,  $J = 32.32$  Hz), 126.32, 126.03, 124.71 (d,  $J = 24.24$  Hz), 123.24, 121.99 (d,  $J = 22.22$  Hz), 117.45, 116.62, 112.94, 112.19, 111.33, 109.81, 101.80, 77.26, 71.29, 71.02, 70.05, 68.36, 66.21, 56.09, 48.82, 40.35, 39.73, 31.43, 29.36, 28.79, 26.30 (d,  $J = 15.15$  Hz), 22.83. HRMS (ESI) calculated for  $\text{C}_{43}\text{H}_{44}\text{F}_6\text{N}_5\text{O}_9$   $[\text{M} + \text{H}]^+$ : 888.3038, found 888.3043. HPLC analysis: MeOH : H<sub>2</sub>O (85 : 15), 13.82 min, 96.03% purity.

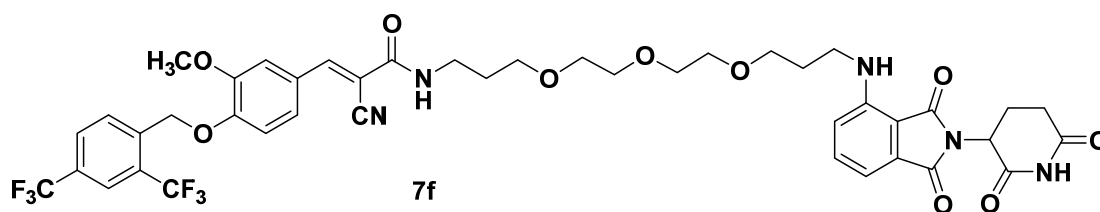

**(*E*)-3-(4-((2,4-bis(trifluoromethyl)benzyl)oxy)-3-methoxyphenyl)-2-cyano-*N*-(3-(2-(2-(3-((2-(2,6-dioxopiperidin-3-yl)-1,3-dioxoisindolin-4-yl)amino)propoxy)ethoxy)propyl)acrylamide (7f).**

Yield: 42%.  $^1\text{H}$  NMR (400 MHz,  $\text{CDCl}_3$ )  $\delta$  8.34 (s, 1H), 8.21 (s, 1H), 7.94 (d,  $J = 8.2$  Hz, 2H), 7.84 (d,  $J = 8.2$  Hz, 1H), 7.70 (d,  $J = 1.9$  Hz, 1H), 7.51 – 7.43 (m, 1H), 7.39 (dd,  $J = 8.5, 1.9$  Hz, 1H), 7.17 (t,  $J = 5.1$  Hz, 1H), 7.06 (d,  $J = 7.1$  Hz, 1H), 6.91 (d,  $J = 8.6$  Hz, 1H), 6.85 (d,  $J = 8.5$  Hz, 1H), 6.44 (t,  $J = 5.6$  Hz, 1H), 5.45 (s, 2H), 4.90 (dd,  $J = 12.0, 5.4$  Hz, 1H), 3.97 (s, 3H), 3.76 – 3.68 (m, 4H), 3.67 – 3.51 (m, 10H), 3.39 (q,  $J = 6.3$  Hz, 2H), 2.92 – 2.82 (m, 1H), 2.81 – 2.66 (m, 2H), 2.16 – 2.09 (m, 1H), 1.95 – 1.81 (m, 4H).  $^{13}\text{C}$  NMR (101 MHz,  $\text{CDCl}_3$ )  $\delta$  171.16, 169.34, 168.47, 167.67, 160.62, 151.98, 150.84, 149.60, 146.97, 139.14, 136.12, 132.47, 130.48 (q,  $J = 34.34$  Hz), 129.28, 128.67, 127.76 (q,  $J = 32.32$  Hz), 126.34, 126.02, 124.71 (d,  $J = 24.24$  Hz), 123.24, 122.00 (d,  $J = 21.21$  Hz), 117.49, 116.67, 112.96, 112.17, 111.35, 109.81, 101.83, 77.26, 70.58, 70.53, 70.47, 70.45, 68.83, 66.19, 56.09, 48.83, 40.20, 39.50, 31.43, 29.27, 28.69, 22.83. HRMS (ESI) calculated for  $\text{C}_{43}\text{H}_{44}\text{F}_6\text{N}_5\text{O}_{10}$   $[\text{M} + \text{H}]^+$ :

904.2987, found 904.2960. HPLC analysis: MeOH : H<sub>2</sub>O (85 : 15), 10.46 min, 97.39% purity.

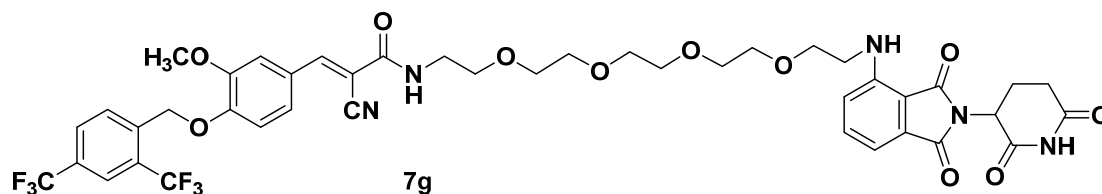

**(*E*)-3-(4-((2,4-bis(trifluoromethyl)benzyl)oxy)-3-methoxyphenyl)-2-cyano-N-(14-(2-(2,6-dioxopiperidin-3-yl)-1,3-dioxoisindolin-4-yl)amino)-3,6,9,12-tetraoxatetradecyl)acrylamide (7g).**

Yield: 50%. <sup>1</sup>H NMR (400 MHz, CDCl<sub>3</sub>) δ 8.54 (s, 1H), 8.21 (s, 1H), 7.94 (d, *J* = 8.2 Hz, 2H), 7.85 (d, *J* = 8.3 Hz, 1H), 7.71 (d, *J* = 1.8 Hz, 1H), 7.47 (t, *J* = 7.8 Hz, 1H), 7.39 (dd, *J* = 8.5, 1.9 Hz, 1H), 7.09 (d, *J* = 7.1 Hz, 1H), 6.96 (s, 1H), 6.90 (d, *J* = 8.5 Hz, 1H), 6.85 (d, *J* = 8.5 Hz, 1H), 6.49 (t, *J* = 5.3 Hz, 1H), 5.45 (s, 2H), 4.91 (dd, *J* = 12.2, 5.4 Hz, 1H), 3.97 (s, 3H), 3.72 – 3.60 (m, 18H), 3.45 (q, *J* = 5.4 Hz, 2H), 2.93 – 2.81 (m, 1H), 2.80 – 2.68 (m, 2H), 2.20 – 2.05 (m, 1H). <sup>13</sup>C NMR (101 MHz, CDCl<sub>3</sub>) δ 169.23, 168.60, 167.63, 160.86, 152.30, 150.93, 149.61, 146.78, 139.12, 136.05, 132.50, 130.48 (q, *J* = 34.34 Hz), 129.28, 128.67, 127.75 (q, *J* = 32.32 Hz), 126.49, 125.95, 124.71 (d, *J* = 24.24 Hz), 123.22, 121.99 (d, *J* = 22.22 Hz), 117.41, 116.77, 112.93, 112.14, 111.65, 110.25, 101.61, 77.26, 70.83, 70.67, 70.65, 70.54, 70.50, 70.41, 69.45, 69.37, 66.18, 56.10, 48.84, 42.34, 40.28, 31.43, 22.84. HRMS (ESI) calculated for C<sub>43</sub>H<sub>44</sub>F<sub>6</sub>N<sub>5</sub>O<sub>11</sub> [M + H]<sup>+</sup>: 920.2936, found 920.2913. HPLC analysis: MeOH : H<sub>2</sub>O (85 : 15), 8.43 min, 95.97% purity.

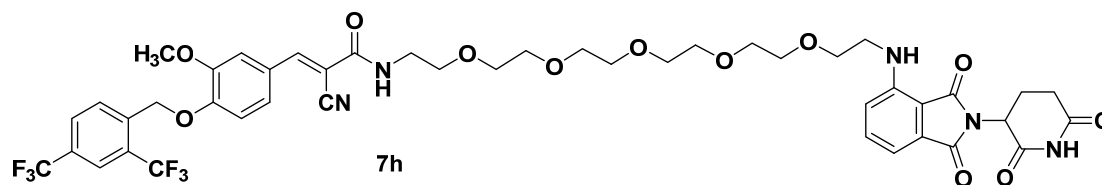

**(*E*)-3-(4-((2,4-bis(trifluoromethyl)benzyl)oxy)-3-methoxyphenyl)-2-cyano-N-(17-(2-(2,6-dioxopiperidin-3-yl)-1,3-dioxoisindolin-4-yl)amino)-3,6,9,12,15-pentaoxaheptadecyl)acrylamide (7h).**

Yield: 49%. <sup>1</sup>H NMR (400 MHz, CDCl<sub>3</sub>) δ 8.62 (s, 1H), 8.22 (s, 1H), 7.94 (d, *J* = 7.9 Hz, 2H), 7.84 (d, *J* = 8.3 Hz, 1H), 7.72 (s, 1H), 7.47 (t, *J* = 7.8 Hz, 1H), 7.40 (dd, *J* =

8.4, 1.9 Hz, 1H), 7.08 (d,  $J = 7.0$  Hz, 1H), 6.92 (dd,  $J = 15.0, 6.4$  Hz, 2H), 6.85 (d,  $J = 8.5$  Hz, 1H), 6.49 (t,  $J = 5.3$  Hz, 1H), 5.45 (s, 2H), 4.92 (dd,  $J = 11.9, 5.3$  Hz, 1H), 3.97 (s, 3H), 3.70 (t,  $J = 5.3$  Hz, 2H), 3.68 – 3.59 (m, 20H), 3.45 (q,  $J = 5.3$  Hz, 2H), 2.95 – 2.67 (m, 3H), 2.17 – 2.07 (m, 1H).  $^{13}\text{C}$  NMR (101 MHz,  $\text{CDCl}_3$ )  $\delta$  171.41, 169.24, 168.57, 167.65, 160.83, 152.27, 150.92, 149.61, 146.78, 139.12, 136.04, 132.50, 130.48 (q,  $J = 33.33$  Hz), 129.24, 128.67, 127.75 (q,  $J = 32.32$  Hz), 126.49, 125.97, 124.71 (d,  $J = 23.23$  Hz), 123.22, 122.99 (d,  $J = 22.22$  Hz), 117.41, 116.77, 112.94, 112.14, 111.64, 110.26, 101.63, 77.27, 70.79, 70.67, 70.58, 70.55, 70.51, 70.46, 70.40, 69.40, 66.18, 56.10, 53.50, 52.76, 48.86, 42.35, 40.28, 31.47, 22.81. HRMS (ESI) calculated for  $\text{C}_{45}\text{H}_{48}\text{F}_6\text{N}_5\text{O}_{12}$   $[\text{M} + \text{H}]^+$ : 964.3198, found 964.3158. HPLC analysis: MeOH :  $\text{H}_2\text{O}$  (85 : 15), 8.46 min, 96.24% purity.

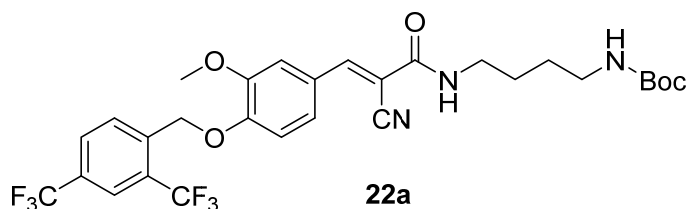

**Tert-butyl(*E*)-(4-(3-(4-(2,4-bis(trifluoromethyl)benzyl)oxy)-3-methoxyphenyl)-2-cyanoacrylamido)butyl)carbamate (22a). General procedure for syntheses of 22b, 27a-27b.**

HATU (194 mg, 0.51 mmol, 1.5 eq), DIPEA (220 mg, 1.7 mmol, 5 eq) and **4a** (150 mg, 0.34 mmol, 1 eq) was added to a solution of **21a** (77.2 mg, 0.41 mmol, 1.2 eq) in dry DMF (2 mL). After being stirred for 1 h at RT, the resulting mixture was extracted with ethyl acetate and saturated  $\text{NaHCO}_3$ . The organic layer was separated, washed with brine, dried with  $\text{Na}_2\text{SO}_4$ . After filtration and evaporation, the residue was purified by silica gel column chromatography (DCM / MeOH=100 : 2.5) to give **22a** (123 mg, 0.20 mmol, 60% yield) as yellow solid:  $^1\text{H}$  NMR (400 MHz,  $\text{CDCl}_3$ )  $\delta$  8.21 (s, 1H), 7.94 (d,  $J = 7.6$  Hz, 2H), 7.84 (d,  $J = 7.6$  Hz, 1H), 7.71 (d,  $J = 1.9$  Hz, 1H), 7.39 (dd,  $J = 8.5, 1.9$  Hz, 1H), 6.86 (d,  $J = 8.4$  Hz, 1H), 6.44 (s, 1H), 5.45 (s, 2H), 4.63 (s, 1H), 3.98 (s, 3H), 3.43 (dd,  $J = 13.0, 6.7$  Hz, 2H), 3.13 (ddd,  $J = 15.8, 11.2, 4.6$  Hz, 2H), 1.68 – 1.50 (m, 4H), 1.42 (d,  $J = 6.7$  Hz, 9H).

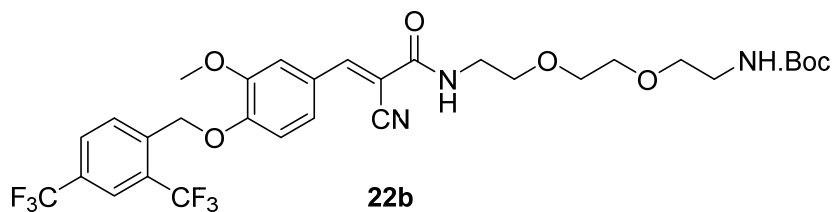

**Tert-butyl(*E*)-(2-(2-(2-(3-(4-((2,4-bis(trifluoromethyl)benzyl)oxy)-3-methoxyphenyl)-2-cyanoacrylamido)ethoxy)ethoxy)ethyl)carbamate (22b).**

Yield: 70%. <sup>1</sup>H NMR (400 MHz, DMSO) δ 8.36 (t, *J* = 5.6 Hz, 1H), 8.18 (d, *J* = 8.1 Hz, 1H), 8.12 (d, *J* = 5.8 Hz, 2H), 8.02 (d, *J* = 8.2 Hz, 1H), 7.72 (d, *J* = 2.0 Hz, 1H), 7.58 (dd, *J* = 8.6, 2.0 Hz, 1H), 7.24 (d, *J* = 8.6 Hz, 1H), 6.78 (t, *J* = 5.6 Hz, 1H), 5.44 (s, 2H), 3.83 (s, 3H), 3.51 (dd, *J* = 7.4, 3.2 Hz, 6H), 3.41 – 3.36 (m, 4H), 3.06 (q, *J* = 6.0 Hz, 2H), 1.36 (s, 9H).

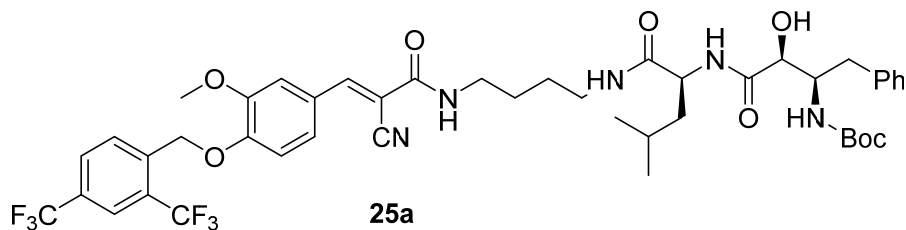

**Tert-butyl((2*R*,3*S*)-4-(((*S*)-1-((4-((*E*)-3-(4-((2,4-bis(trifluoromethyl)benzyl)oxy)-3-methoxyphenyl)-2-cyanoacrylamido)butyl)amino)-4-methyl-1-oxopentan-2-yl)amino)-3-hydroxy-4-oxo-1-phenylbutan-2-yl)carbamate (25a). General procedure for syntheses of 25b.**

TFA (2 mL) was added to a solution of Compound **22a** (115 mg, 0.19 mmol, 1 eq) in DCM (4 mL). After being stirred for 1 h, the solvents were removed in vacuo, and residual TFA was removed by the addition and evaporation of toluene (3 x 3mL). The crude product was used to next step without further purification. HATU (110.3 mg, 0.29 mmol, 1.5 eq), DIPEA (123 mg, 0.95 mmol, 5 eq) and **24** (77.6 mg, 0.19 mmol, 1 eq) was added to a solution of the crude product obtained above in DMF (3 ml) at 25 °C. After being stirred for 1 h, the resulting mixture was extracted with ethyl acetate and saturated NaHCO<sub>3</sub>. The organic layer was separated, washed with brine, dried with Na<sub>2</sub>SO<sub>4</sub>. After filtration and evaporation, the residue was purified by silica gel column chromatography (MeOH : CH<sub>2</sub>Cl<sub>2</sub> = 2.5 : 100) to give **25a** (118 mg, 0.13 mmol, 68%) as colorless solid: <sup>1</sup>H NMR (400 MHz, CDCl<sub>3</sub>) δ 8.16 (s, 1H), 7.95 (d, *J*



= 8.6 Hz, 2H), 7.85 (d,  $J = 8.2$  Hz, 1H), 7.71 (d,  $J = 1.8$  Hz, 1H), 7.39 (dd,  $J = 8.4, 1.7$  Hz, 1H), 7.26 – 7.16 (m, 5H), 6.87 (d,  $J = 8.5$  Hz, 1H), 6.78 (s, 1H), 6.57 (s, 1H), 5.50 (s, 1H), 5.46 (s, 2H), 5.03 (d,  $J = 8.2$  Hz, 1H), 4.53 – 4.41 (m, 1H), 4.11 (dd,  $J = 19.4, 6.3$  Hz, 2H), 3.98 (s, 3H), 3.54 – 3.28 (m, 3H), 3.19 – 3.03 (m, 2H), 4.4 Hz, 1H), 2.80 (s, 2H), 1.68 (s, 2H), 1.65 – 1.46 (m, 6H), 1.36 (s, 9H), 0.90 (dd,  $J = 12.1, 6.3$  Hz, 6H).

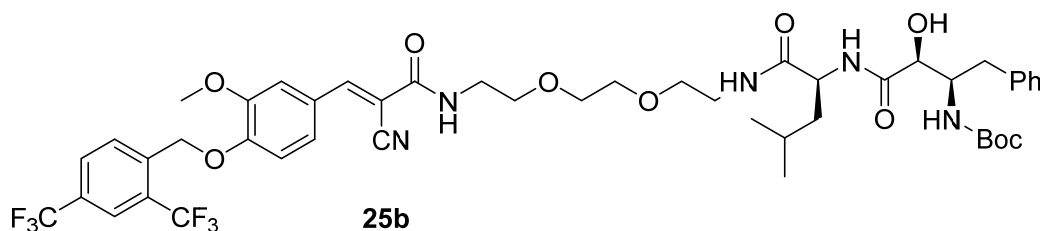

**Tert-butyl((15*S*,18*S*,19*R*,*E*)-1-(4-((2,4-bis(trifluoromethyl)benzyl)oxy)-3-methoxyphenyl)-2-cyano-18-hydroxy-15-isobutyl-3,14,17-trioxo-20-phenyl-7,10-dioxo-4,13,16-triazaicos-1-en-19-yl)carbamate (25b).**

Yield: 27%.  $^1\text{H}$  NMR (400 MHz,  $\text{CDCl}_3$ )  $\delta$  8.20 (s, 1H), 7.92 (d,  $J = 6.1$  Hz, 2H), 7.82 (d,  $J = 8.7$  Hz, 1H), 7.67 (d,  $J = 1.7$  Hz, 1H), 7.40 (dd,  $J = 8.3, 1.7$  Hz, 1H), 7.23 – 7.09 (m, 5H), 6.85 (d,  $J = 8.5$  Hz, 1H), 6.75 (d,  $J = 8.5$  Hz, 1H), 5.90 (d,  $J = 28.0$  Hz, 1H), 5.41 (d,  $J = 16.0$  Hz, 3H), 5.21 (dd,  $J = 8.1, 4.9$  Hz, 1H), 4.57 – 4.41 (m, 1H), 4.14 – 4.03 (m, 1H), 3.96 – 3.88 (m, 4H), 3.64 – 3.30 (m, 16H), 3.00 – 2.91 (m, 2H), 1.33 (s, 9H), 0.88 (dd,  $J = 12.7, 4.8$  Hz, 6H).

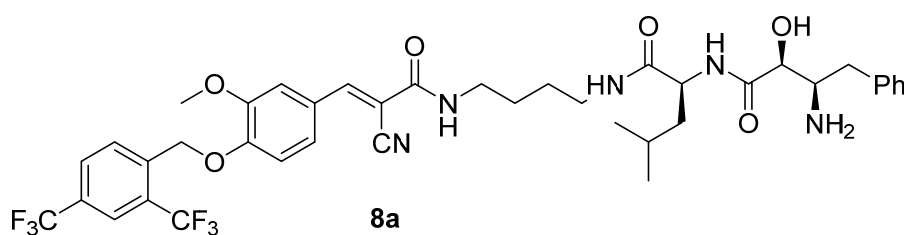

**(*S*)-2-((2*S*,3*R*)-3-amino-2-hydroxy-4-phenylbutanamido)-*N*-(4-((*E*)-3-(4-((2,4-bis(trifluoromethyl)benzyl)oxy)-3-methoxyphenyl)-2-cyanoacrylamido)butyl)-4-methylpentanamide (8a). General procedure for syntheses of 8b.**

4 N HCl in 1,4-dioxane (6 mL) was added to a solution of Compound **25a** (118 mg, 0.13 mmol, 1 eq) in DCM (3 mL) at 0°C. After being stirred for 8 h at rt, the solvents were removed in vacuo, and the resulting mixture was extracted with ethyl acetate and saturated  $\text{NaHCO}_3$ . The organic layer was separated, washed with brine, dried with

Na<sub>2</sub>SO<sub>4</sub>. After filtration and evaporation, the residue was purified by silica gel column chromatography (MeOH : CH<sub>2</sub>Cl<sub>2</sub> = 1 : 15) to give **8a** (62 mg, 0.077 mmol, 59%) as colorless solid: <sup>1</sup>H NMR (400 MHz, DMSO) δ 8.38 (t, *J* = 5.4 Hz, 1H), 8.18 (d, *J* = 6.9 Hz, 2H), 8.11 (d, *J* = 6.5 Hz, 2H), 8.02 (d, *J* = 8.1 Hz, 1H), 7.72 (d, *J* = 8.7 Hz, 2H), 7.58 (d, *J* = 8.5 Hz, 1H), 7.31 – 7.15 (m, 6H), 5.49 (d, *J* = 36.9 Hz, 3H), 4.27 (dd, *J* = 14.0, 8.9 Hz, 1H), 3.83 (s, 3H), 3.75 (d, *J* = 2.0 Hz, 1H), 3.19 (d, *J* = 5.8 Hz, 2H), 3.12 (dd, *J* = 6.6, 4.7 Hz, 1H), 3.04 (d, *J* = 4.7 Hz, 2H), 2.77 (dd, *J* = 13.1, 6.5 Hz, 1H), 1.62 – 1.33 (m, 9H), 1.22 (s, 1H), 0.84 (dd, *J* = 9.2, 6.6 Hz, 6H). <sup>13</sup>C NMR (101 MHz, DMSO) δ 173.08, 172.07, 161.54, 150.98, 150.63, 149.37, 140.27, 139.85, 131.63, 130.44, 129.75 (q, *J* = 33.33 Hz), 129.68, 128.65, 128.11 (q, *J* = 32.32 Hz), 126.34, 125.95, 125.37, 125.17, 123.67, 122.45, 117.47, 113.84, 113.31, 103.90, 72.98, 66.59, 56.09, 51.19, 41.65, 40.94, 38.67, 26.92, 26.82, 24.69, 23.54, 22.05. HRMS (ESI) calculated for C<sub>40</sub>H<sub>46</sub>F<sub>6</sub>N<sub>5</sub>O<sub>6</sub> [M + H]<sup>+</sup>: 806.3347, found 806.3317. HPLC analysis: MeOH : H<sub>2</sub>O : TEA (90 : 10 : 0.01), 13.76 min, 99.48% purity.

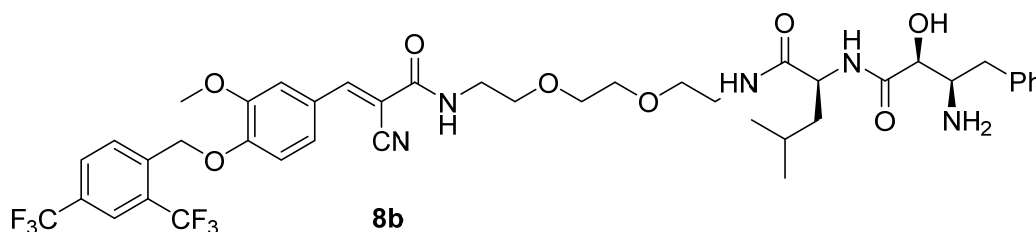

**(S)-2-((2*S*,3*R*)-3-amino-2-hydroxy-4-phenylbutanamido)-N-(2-(2-(2-((*E*)-3-(4-((2,4-bis(trifluoromethyl)benzyl)oxy)-3-methoxyphenyl)-2-cyanoacrylamido)ethoxy)ethyl)-4-methylpentanamide (8b).**

Yield: 58%. <sup>1</sup>H NMR (400 MHz, CDCl<sub>3</sub>) δ 8.23 (s, 1H), 7.94 (d, *J* = 8.1 Hz, 2H), 7.85 (d, *J* = 8.3 Hz, 1H), 7.69 (d, *J* = 2.0 Hz, 1H), 7.59 (d, *J* = 8.7 Hz, 1H), 7.42 (dd, *J* = 8.5, 1.9 Hz, 1H), 7.33 – 7.26 (m, 2H), 7.25 – 7.17 (m, 3H), 7.14 (s, 1H), 7.00 (t, *J* = 4.8 Hz, 1H), 6.87 (d, *J* = 8.5 Hz, 1H), 5.45 (s, 2H), 4.54 – 4.43 (m, 1H), 3.99 (d, *J* = 2.6 Hz, 1H), 3.97 (s, 3H), 3.66 – 3.52 (m, 10H), 3.42 (tdd, *J* = 14.0, 9.3, 4.7 Hz, 2H), 2.96 (dd, *J* = 13.5, 5.1 Hz, 1H), 2.56 (dd, *J* = 13.4, 9.6 Hz, 1H), 1.76 – 1.71 (m, 1H), 1.64 – 1.55 (m, 2H), 0.90 (dt, *J* = 12.4, 6.2 Hz, 8H). <sup>13</sup>C NMR (101 MHz, CDCl<sub>3</sub>) δ 173.35, 171.97, 160.92, 152.54, 151.05, 149.65, 139.08, 138.18, 130.51 (q, *J* = 33.33 Hz), 129.31, 129.24, 128.82, 128.74, 128.66, 127.76 (q, *J* = 32.32 Hz), 126.73, 126.42,

125.89, 124.71 (d,  $J = 23.23$  Hz), 123.22, 122.00 (d,  $J = 22.22$  Hz), 117.52, 112.98, 112.28, 101.45, 77.26, 72.53, 70.52, 70.34, 70.20, 69.82, 69.37, 66.23, 56.10, 54.44, 51.71, 40.75, 40.27, 39.35, 39.03, 31.95, 29.73, 29.69, 29.56, 29.40, 24.88, 22.99, 22.73, 21.83, 14.18. HRMS (ESI) calculated for  $C_{42}H_{50}F_6N_5O_8$   $[M + Na]^+$ : 888.3378, found 888.3370. HPLC analysis: MeOH : H<sub>2</sub>O : TEA (90 : 10 : 0.01), 13.17 min, 98.32% purity.

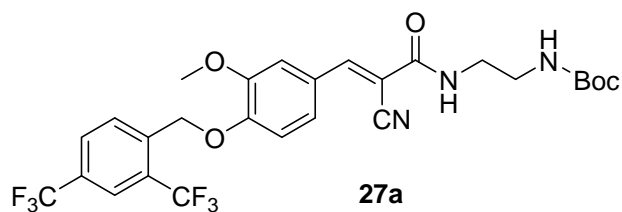

**Tert-butyl(*E*)-(2-(3-(4-((2,4-bis(trifluoromethyl)benzyl)oxy)-3-methoxyphenyl)-2-cyanoacrylamido)ethyl)carbamate (27a).**

Yield: 62%. <sup>1</sup>H NMR (400 MHz, CDCl<sub>3</sub>) δ 8.21 (s, 1H), 7.95 (d,  $J = 8.8$  Hz, 2H), 7.85 (d,  $J = 8.0$  Hz, 1H), 7.74 (d,  $J = 1.7$  Hz, 1H), 7.39 (dd,  $J = 8.5, 2.0$  Hz, 1H), 7.05 (s, 1H), 6.86 (d,  $J = 8.4$  Hz, 1H), 5.46 (s, 2H), 3.99 (s, 3H), 3.54 (dd,  $J = 11.1, 5.4$  Hz, 2H), 3.42 – 3.33 (m, 2H), 2.80 (s, 1H), 1.45 (s, 9H).

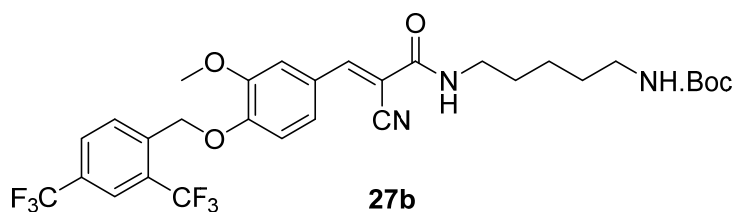

**Tert-butyl(*E*)-(5-(3-(4-((2,4-bis(trifluoromethyl)benzyl)oxy)-3-methoxyphenyl)-2-cyanoacrylamido)pentyl)carbamate (27b).**

Yield: 55%. <sup>1</sup>H NMR (400 MHz, CDCl<sub>3</sub>) δ 8.22 (s, 1H), 7.95 (d,  $J = 8.5$  Hz, 2H), 7.85 (d,  $J = 8.2$  Hz, 1H), 7.71 (d,  $J = 2.0$  Hz, 1H), 7.39 (dd,  $J = 8.5, 2.0$  Hz, 1H), 6.86 (d,  $J = 8.5$  Hz, 1H), 6.34 (s, 1H), 5.46 (s, 2H), 4.56 (s, 1H), 3.99 (s, 3H), 3.42 (dd,  $J = 13.3, 6.9$  Hz, 2H), 3.13 (dd,  $J = 13.0, 6.5$  Hz, 2H), 1.64 – 1.58 (m, 2H), 1.52 (dd,  $J = 14.7, 7.3$  Hz, 2H), 1.43 (s, 10H), 1.41 – 1.34 (m, 2H).

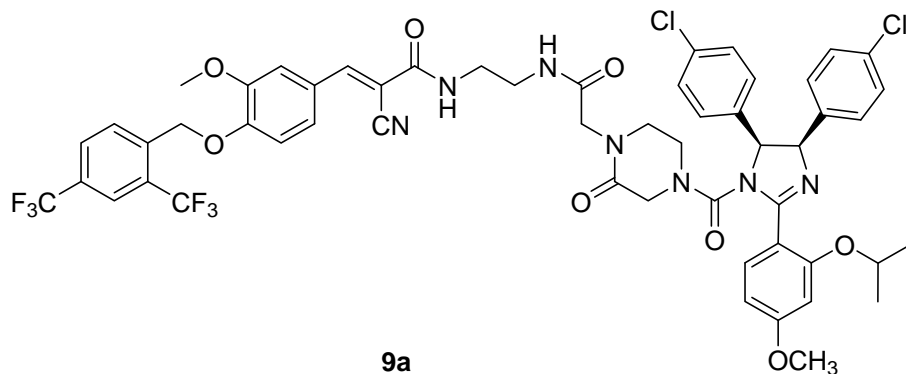

**(E)-N-(2-(2-(4-((4*R*,5*S*)-4,5-bis(4-chlorophenyl)-2-(2-isopropoxy-4-methoxyphenyl)-4,5-dihydro-1*H*-imidazole-1-carbonyl)-2-oxopiperazin-1-yl)acetamido)ethyl)-3-(4-((2,4-bis(trifluoromethyl)benzyl)oxy)-3-methoxyphenyl)-2-cyanoacrylamide (9a).**

TFA (2 mL) was added to a solution of Compound **27a** (124 mg, 0.21 mmol, 1 eq) in DCM (4 mL). After being stirred for 1 h, the solvents were removed in vacuo, and residual TFA was removed by the addition and evaporation of toluene (3 x 3mL). The crude product was used to next step without further purification. HATU (121.7 mg, 0.32 mmol, 1.5 eq), DIPEA (156.4 mg, 1.1 mmol, 5 eq) and **29** (134.3 mg, 0.21 mmol, 1 eq) was added to a solution of the crude product obtained above in DMF (3 ml) at 25 °C. After being stirred for 1 h, the resulting mixture was extracted with ethyl acetate and saturated NaHCO<sub>3</sub>. The organic layer was separated, washed with brine, dried with Na<sub>2</sub>SO<sub>4</sub>. After filtration and evaporation, the residue was purified by silica gel column chromatography (MeOH : CH<sub>2</sub>Cl<sub>2</sub> = 2.5 : 100) to give **9a** (107 mg, 0.096 mmol, 46%) as colorless solid: <sup>1</sup>H NMR (400 MHz, CDCl<sub>3</sub>) δ 8.11 (s, 1H), 7.97 (d, *J* = 9.0 Hz, 2H), 7.87 (d, *J* = 8.1 Hz, 1H), 7.70 (s, 1H), 7.60 (d, *J* = 8.5 Hz, 1H), 7.37 (d, *J* = 8.6 Hz, 1H), 7.11 (dd, *J* = 18.4, 5.5 Hz, 2H), 7.05 – 6.79 (m, 9H), 6.55 (dd, *J* = 8.5, 2.2 Hz, 1H), 6.49 (d, *J* = 2.1 Hz, 1H), 5.58 (d, *J* = 9.6 Hz, 1H), 5.49 (d, *J* = 12.8 Hz, 3H), 4.64 (dt, *J* = 12.0, 6.0 Hz, 1H), 4.03 – 3.90 (m, 4H), 3.86 (s, 4H), 3.67 (dd, *J* = 28.0, 16.1 Hz, 2H), 3.58 – 3.50 (m, 2H), 3.43 (dd, *J* = 13.9, 5.2 Hz, 2H), 3.30 – 3.04 (m, 3H), 1.43 – 1.32 (m, 7H). <sup>13</sup>C NMR (101 MHz, CDCl<sub>3</sub>) δ 168.37, 165.82, 163.04, 162.24, 160.22, 157.00, 154.73, 152.87, 151.23, 149.61, 139.03, 135.91, 135.05, 133.10, 132.90, 132.26, 130.53 (q, *J* = 33.33 Hz), 129.27, 128.70, 128.49, 128.03,

127.99, 127.78 (q,  $J = 32.32$  Hz), 126.71, 125.72, 124.70 (d,  $J = 24.24$  Hz), 123.24, 122.00 (d,  $J = 22.22$  Hz), 117.38, 113.19, 112.87, 112.33, 104.48, 100.60, 100.06, 77.26, 71.82, 70.88, 69.19, 66.18, 56.08, 55.59, 50.91, 49.62, 47.37, 42.16, 40.62, 31.45, 30.18, 29.73, 22.16, 22.04. HRMS (ESI) calculated for  $C_{54}H_{50}Cl_2F_6N_7O_8$  [ $M + H$ ] $^+$ : 1108.2997, found 1108.3023. HPLC analysis: MeOH : H<sub>2</sub>O (90 : 10), 8.52 min, 95.09% purity.

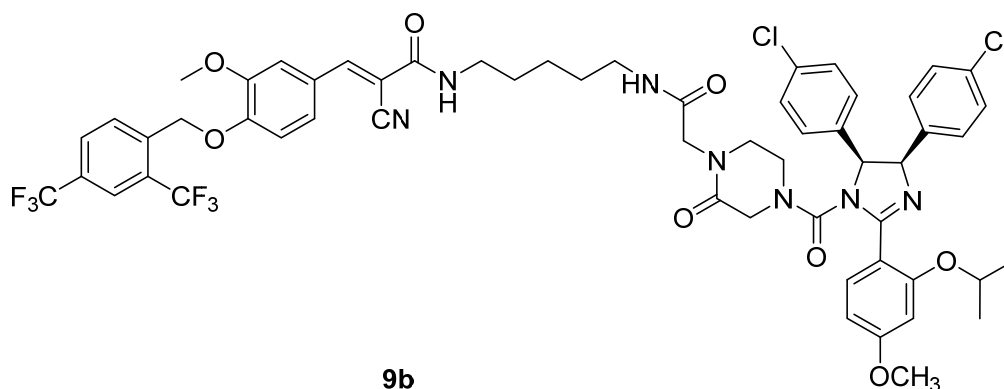

**(*E*)-N-(5-(2-(4-((4*R*,5*S*)-4,5-bis(4-chlorophenyl)-2-(2-isopropoxy-4-methoxyphenyl)-4,5-dihydro-1*H*-imidazole-1-carbonyl)-2-oxopiperazin-1-yl)acetamido)pentyl)-3-(4-((2,4-bis(trifluoromethyl)benzyl)oxy)-3-methoxyphenyl)-2-cyanoacrylamide (9b).**

Yield: 70%. <sup>1</sup>H NMR (400 MHz, CDCl<sub>3</sub>) δ 8.21 (s, 1H), 7.95 (d,  $J = 8.1$  Hz, 2H), 7.85 (d,  $J = 8.1$  Hz, 1H), 7.70 (d,  $J = 2.0$  Hz, 1H), 7.58 (d,  $J = 8.5$  Hz, 1H), 7.40 (dd,  $J = 8.5, 2.0$  Hz, 1H), 7.08 (d,  $J = 8.4$  Hz, 2H), 7.02 (d,  $J = 8.5$  Hz, 2H), 6.93 (d,  $J = 8.4$  Hz, 2H), 6.87 (dd,  $J = 8.4, 1.7$  Hz, 3H), 6.54 (dd,  $J = 8.5, 2.2$  Hz, 1H), 6.47 (d,  $J = 2.2$  Hz, 2H), 6.19 (t,  $J = 5.7$  Hz, 1H), 5.52 (dd,  $J = 31.1, 9.8$  Hz, 2H), 5.46 (s, 2H), 4.61 (dt,  $J = 12.1, 6.0$  Hz, 1H), 3.97 (s, 3H), 3.91 (d,  $J = 3.3$  Hz, 1H), 3.86 (d,  $J = 10.3$  Hz, 4H), 3.67 (dd,  $J = 12.4, 5.6$  Hz, 2H), 3.52 (dd,  $J = 8.9, 4.6$  Hz, 1H), 3.39 (dd,  $J = 13.2, 6.8$  Hz, 2H), 3.26 – 3.17 (m, 3H), 3.13 (t,  $J = 5.0$  Hz, 2H), 1.58 (dd,  $J = 14.7, 7.3$  Hz, 2H), 1.50 (dd,  $J = 14.6, 7.1$  Hz, 2H), 1.35 (dd,  $J = 15.8, 6.0$  Hz, 8H). <sup>13</sup>C NMR (101 MHz, CDCl<sub>3</sub>) δ 171.26, 167.66, 165.68, 163.00, 160.72, 160.15, 156.99, 154.63, 152.45, 151.06, 149.66, 139.07, 135.97, 135.03, 133.18, 132.90, 132.25, 130.51 (q,  $J = 33.33$  Hz), 129.27, 128.67, 128.45, 128.12, 128.00, 127.77 (q,  $J = 32.32$  Hz), 126.52, 125.86, 124.71 (d,  $J = 23.23$  Hz), 123.26, 122.99 (d,  $J = 22.22$  Hz), 117.69, 113.27, 112.96,

112.13, 104.46, 101.29, 100.05, 77.26, 71.79, 70.93, 69.14, 66.23, 60.46, 56.11, 55.59, 50.83, 49.71, 47.27, 42.14, 40.26, 39.27, 29.01, 28.89, 23.97, 22.17, 22.04, 21.12, 14.23. HRMS (ESI) calculated for  $C_{57}H_{56}Cl_2F_6N_7O_8$   $[M + H]^+$ : 1150.3466, found 1150.3453. HPLC analysis: MeOH : H<sub>2</sub>O (90 : 10), 12.56 min, 98.74% purity.

### 3. *In Vitro* TR-FRET Assay

LanthaScreen™ Estrogen Related Receptor alpha TR-FRET Coactivator Assay (Invitrogen, PV4663) were performed to examine the functional response of ERR $\alpha$  ligands. Compounds were successively diluted in complete assay buffer (2 $\times$ ) with 5 different concentrations. 10  $\mu$ l of 10 nM this solution was transferred to 384-well black assay plates (Thermo, #267461), 5  $\mu$ l of 20 nM ERR alpha-LBD (4 $\times$ ) in complete assay buffer was added. Next, 5  $\mu$ l of 2  $\mu$ M fluorescein-PGC1 $\alpha$  and 20 nM Tb anti-GST antibody solution in complete assay buffer (4 $\times$ ) was added to each well to give a final 20  $\mu$ l of reagent solution volumes. All determinations were performed in triplicate and DMSO as a control. The samples were incubated in the dark for 1h at room temperature on a plate shaker. Fluorescence intensity at 495 nm and 520 nm were measured using microplate reader (Bio-Tek, Synergy H1). The TR-FRET ratio was calculated by dividing the emission signal at 520 nm by the emission signal at 495 nm, and a binding curve by plotting the emission ratio vs. the log [ligand] was generated. Finally, the IC<sub>50</sub> value was provided by GraphPad Prism.

Likewise, the commercial TR-FRET assay was used to evaluate the functional response of PROATC 6c against the ERR $\beta$  (Invitrogen, PV4800) and ERR $\gamma$  (Invitrogen, PV4408) receptor, respectively.

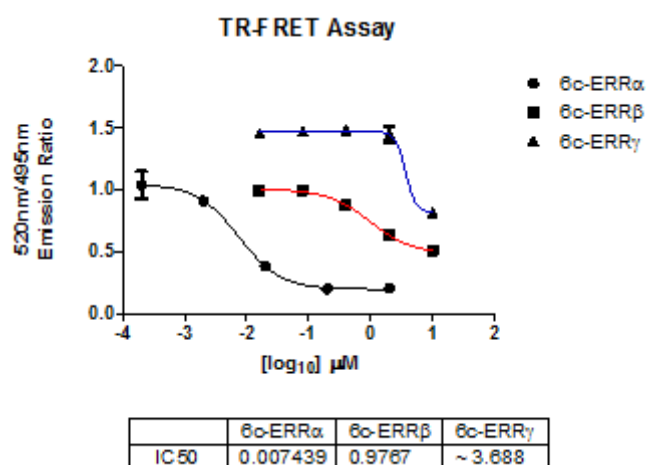

Figure S1. PROTAC 6c showed no significant effects on inhibiting PGC-1 $\alpha$  binding with ERR $\beta$  and ERR $\gamma$ .

#### 4. Computational Study

All the procedure was performed in Maestro (version 9.9, Schrödinger, LLC, New York, NY, 2014) implemented in the Schrödinger program (<http://www.schrödinger.com>). The crystal structure of ERR $\alpha$  protein with compound 1 (XCT790) (PDB code: 3K6P) were taken from the Protein Data Bank (<http://www.pdb.org>). The protein was prepared using the Protein Preparation Wizard workflow in Maestro to add bond orders and to add hydrogens. All heteroatom (het) residues and crystal water molecules were removed. The ligand XCT790 was prepared using LigPrep (version 3.1, Schrödinger, LLC, New York, NY, 2014) with the OPLS-2005 force field. In this study, molecular docking study was performed with the Glide program (version 6.4, Schrödinger, LLC, New York, NY, 2014) using the SP (Standard precision) score mode. The grid-enclosing box was placed on the centroid of the binding ligand in the optimized crystal structure as described above, and bounding box was set to 18 Å. For all of the methods, Glide docks flexible ligands were fit into a rigid receptor structure. The Figure 2a was generated using PyMol.



## 5. Western Blot Analysis

MDA-MB-231 cell line was purchased from the ATCC and cultured in RPMI 1640 media supplemented with 10% (v/v) fetal bovine serum (FBS) and 1% (v/v) penicillin-streptomycin at 37°C in a humidified incubator with 5% CO<sub>2</sub>.

The cells were treated with compound of indicated concentrations for various times in 12-well plates. Next, cells washed with phosphate buffered saline (PBS) and lysed in 150ul of 1x sodium dodecyl sulfate (SDS) lysis buffer (CST recommended) with protease and phosphatase inhibitors. Immunoblotting was performed using standard protocols, here, glyceraldehyde-3-phosphate dehydrogenase (GAPDH) was used as loading control. The antibodies used were ERR $\alpha$  (1:1000, Cell Signaling Technology, #2101), ERR $\beta$  (1:1200, Sigma-Aldrich, E0156), ERR $\gamma$  (1:100, Santa Cruz, sc-393969), ER $\alpha$  (1:1000, CST, 13258s), MCAD (1:10000, abcam, ab92461), PDK4 (1:100, Santa Cruz, sc-130841), ATP5B (1:300, Santa Cruz, sc-33618) and GAPDH (1:4000, Beyotime, AG019-1). Peroxidase reaction were detected using ECL western blotting Detection Kit (Thermo Scientific, Waltham, MA) by Amersham Imager 600 system (GE, America). D (%) values were generated by ImageJ software analysis. The data are means from at least three independent experiments and the variations are less than 20%.

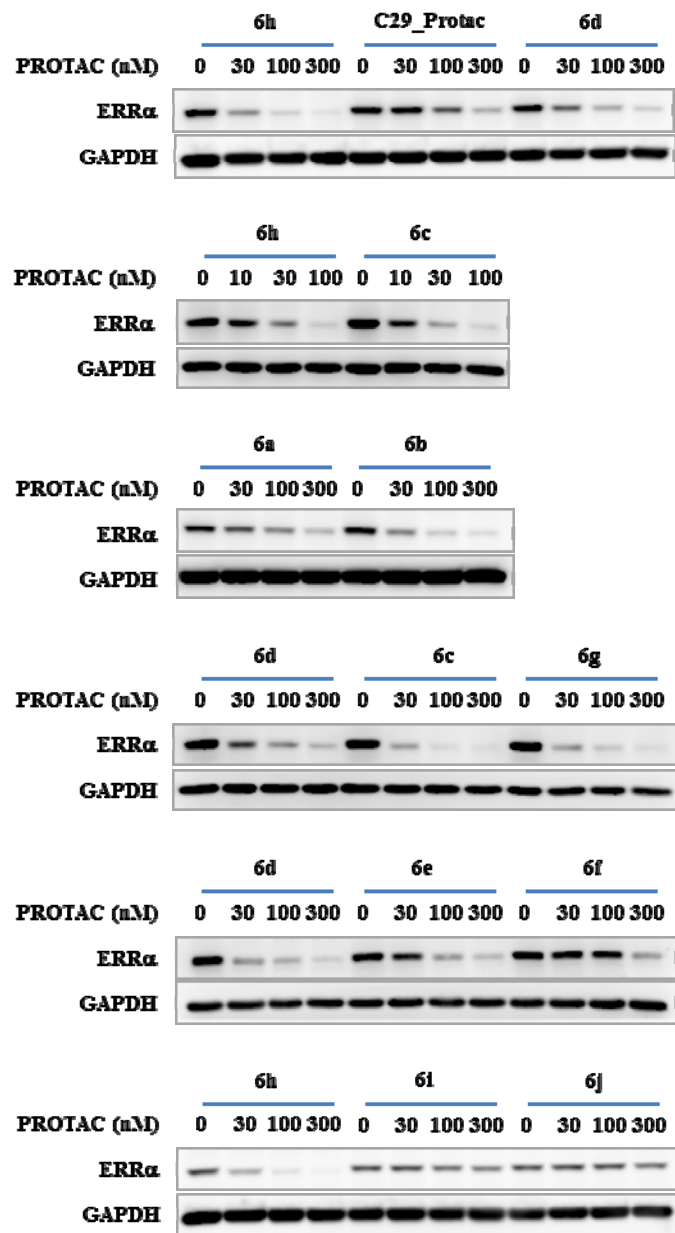

Figure S2. Degradation effects of PROTACs **6a-6j** on ERR $\alpha$  proteins in MDA-MB-231 cells at indicated concentrations for 4 h.

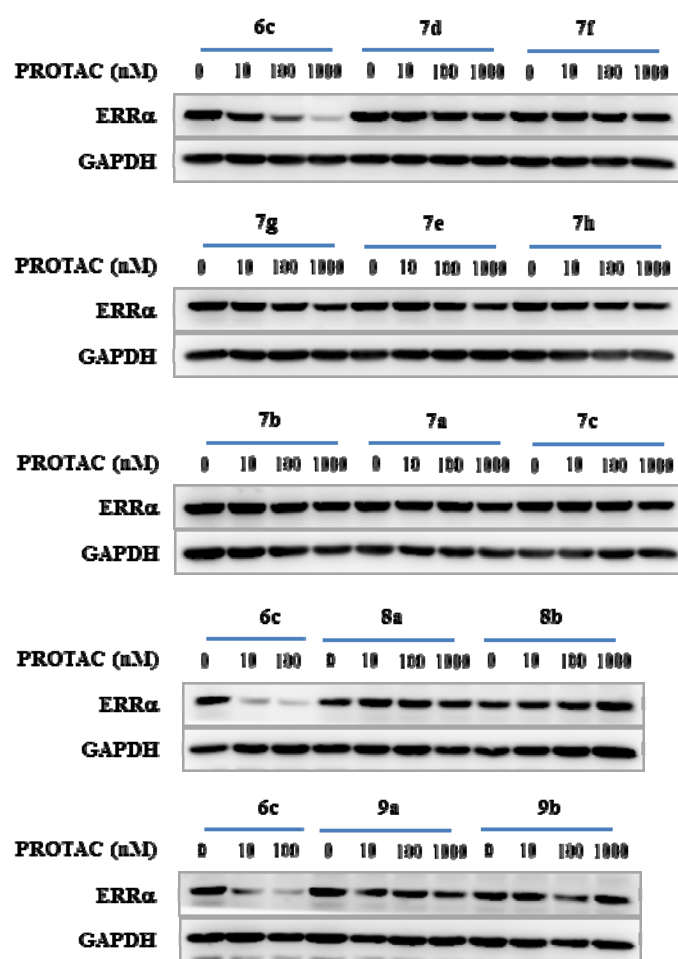

Figure S3. Degradation effects of PROTACs **7a-7h**, **8a-8b**, **9a-9b** on ERR $\alpha$  proteins in MDA-MB-231 cells at indicated concentrations for 4 h.

| Cpd. No. | Structure |
|----------|-----------|
| 7a       |           |
| 7b       |           |
| 7c       |           |
| 7d       |           |

|    |  |
|----|--|
| 7e |  |
| 7f |  |
| 7g |  |
| 7h |  |
| 8a |  |
| 8b |  |
| 9a |  |
| 9b |  |

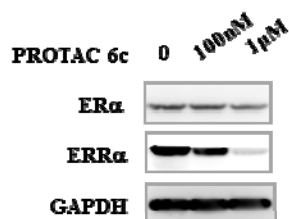

Figure S4. Western blotting analysis of ERα and ERRα in MCF-7 cells treated with PROTAC 6c at the indicated concentrations at 4.0 hrs.

Western blotting analysis showed that PROTAC 6c dose-dependently induced ERRα degradation, did not show obvious effect on ERα in MCF-7 breast cancer cell lines.

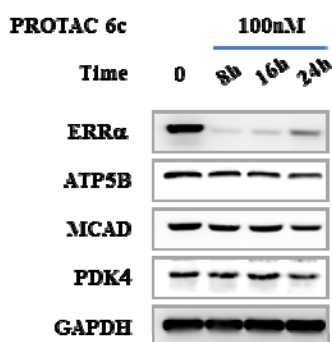

Figure S5. Western blotting analysis of the target gene of ERRα in MDA-MB-231 cells treated with PROTAC 6c at the indicated concentration and time points.

Western blotting analysis showed that PROTAC 6c potently decreased the protein levels of ATP5B, MCAD and PDK4 at the concentration of 100nM in the MDA-MB-231 cell line after a 24-hr treatment.

## 6. $^1\text{H}$ and $^{13}\text{C}$ NMR Spectra

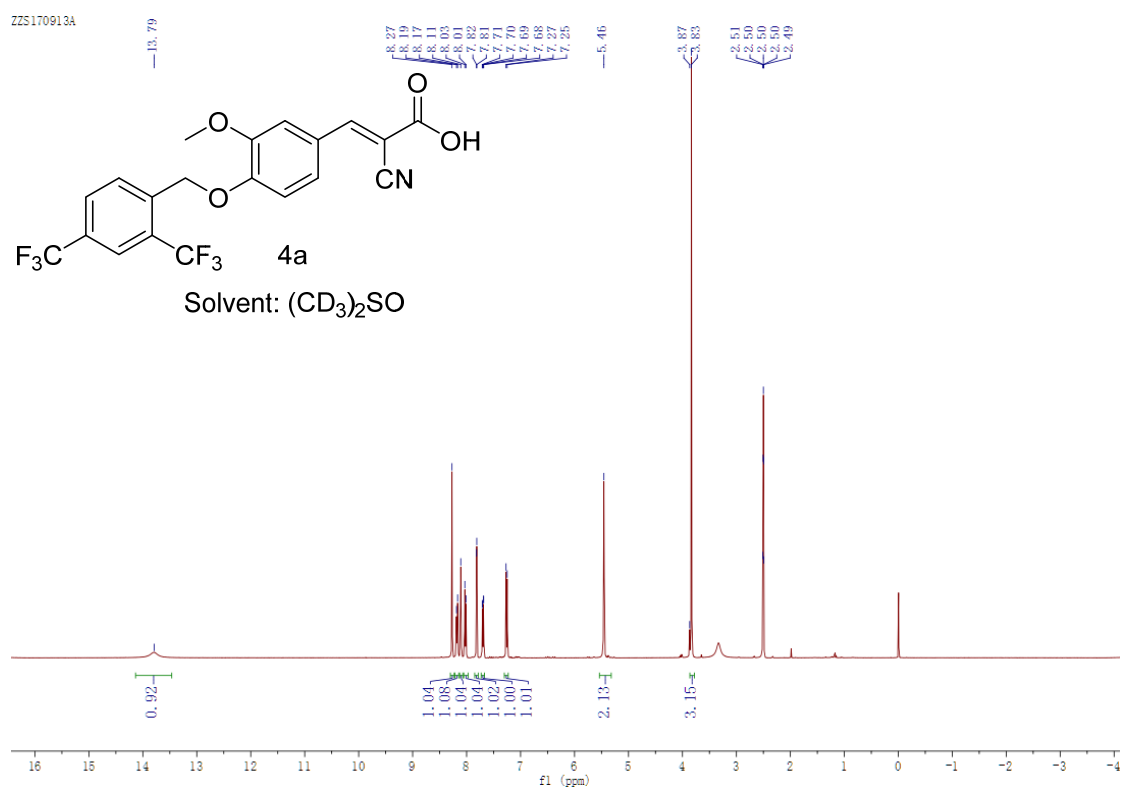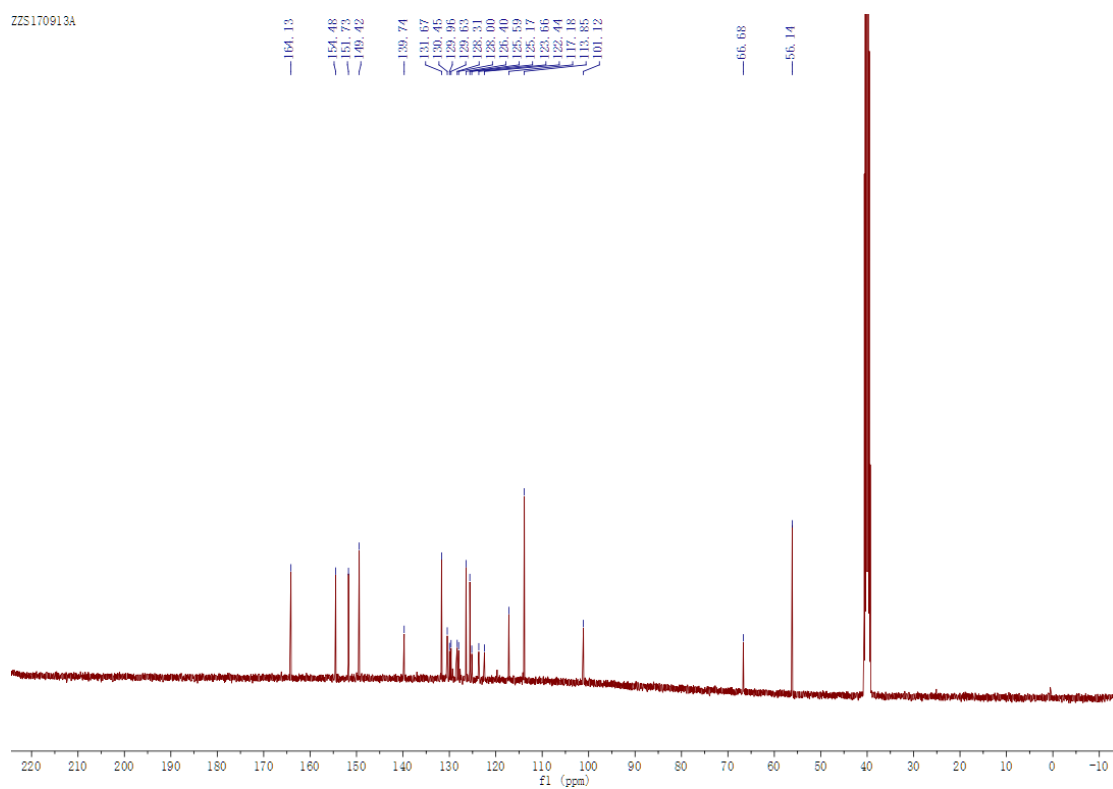

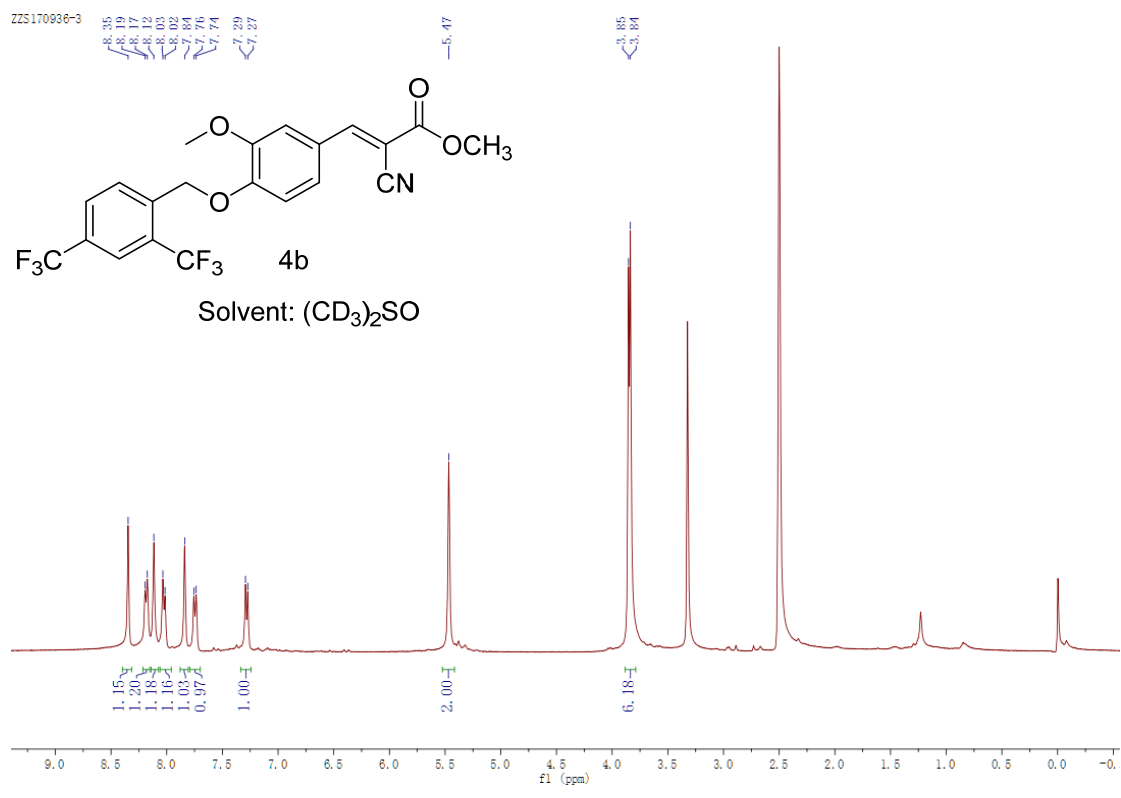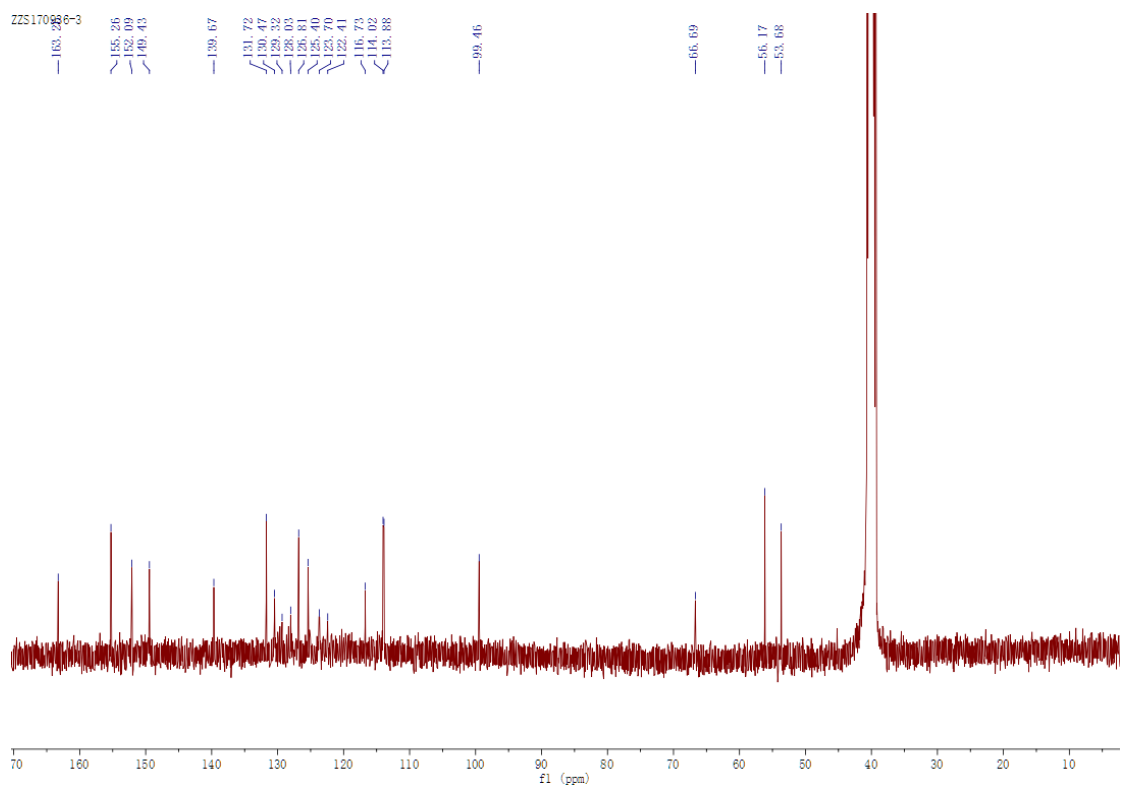

ZZS170915-2

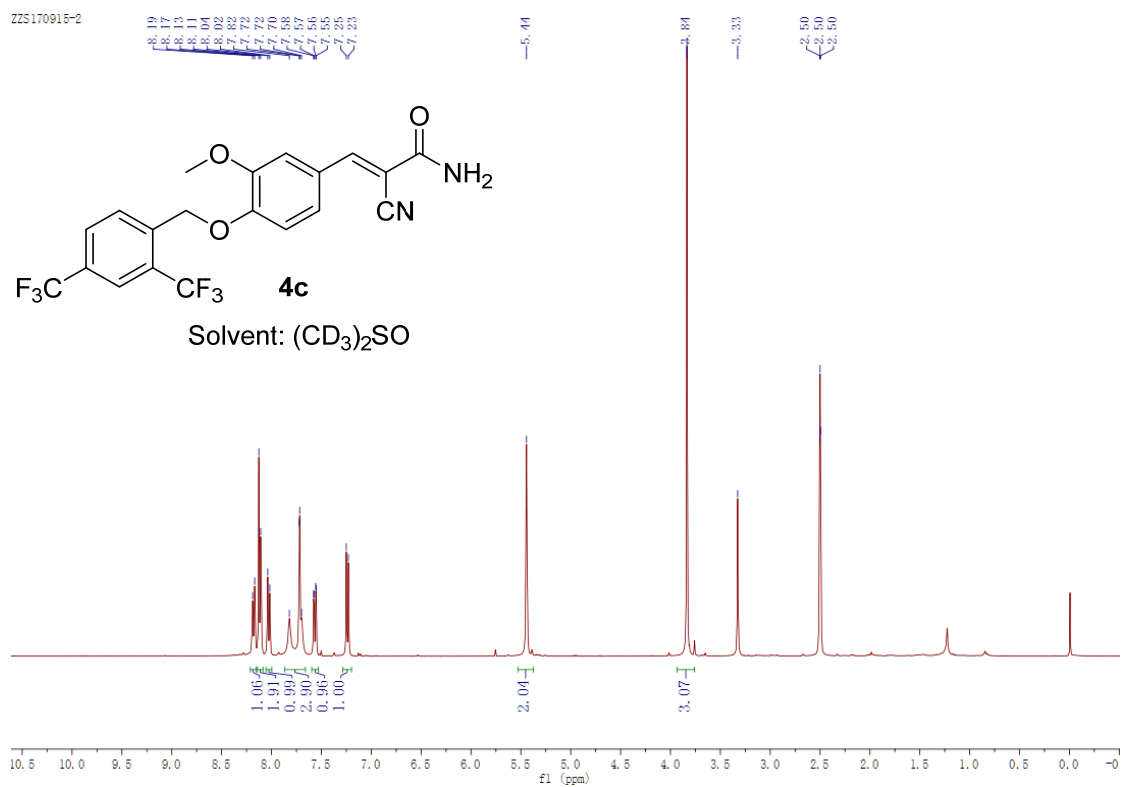

ZZS170915-2

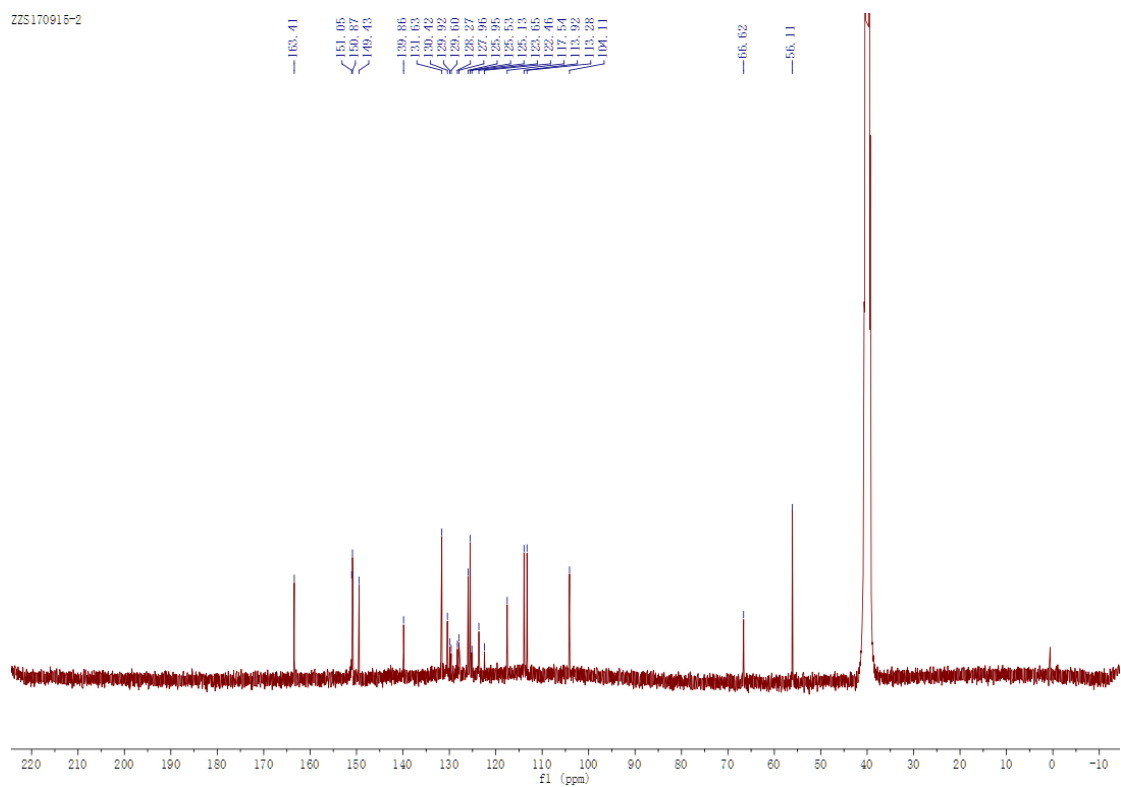



ZZ5171010D

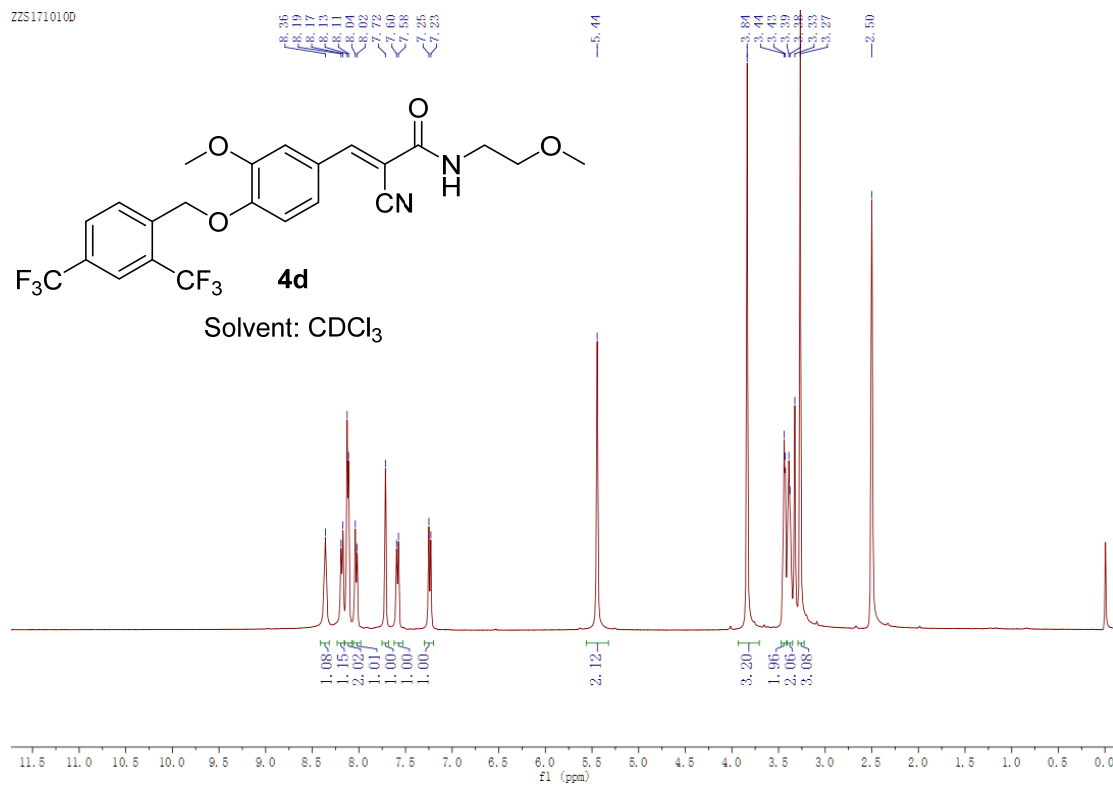

ZZ5171010D

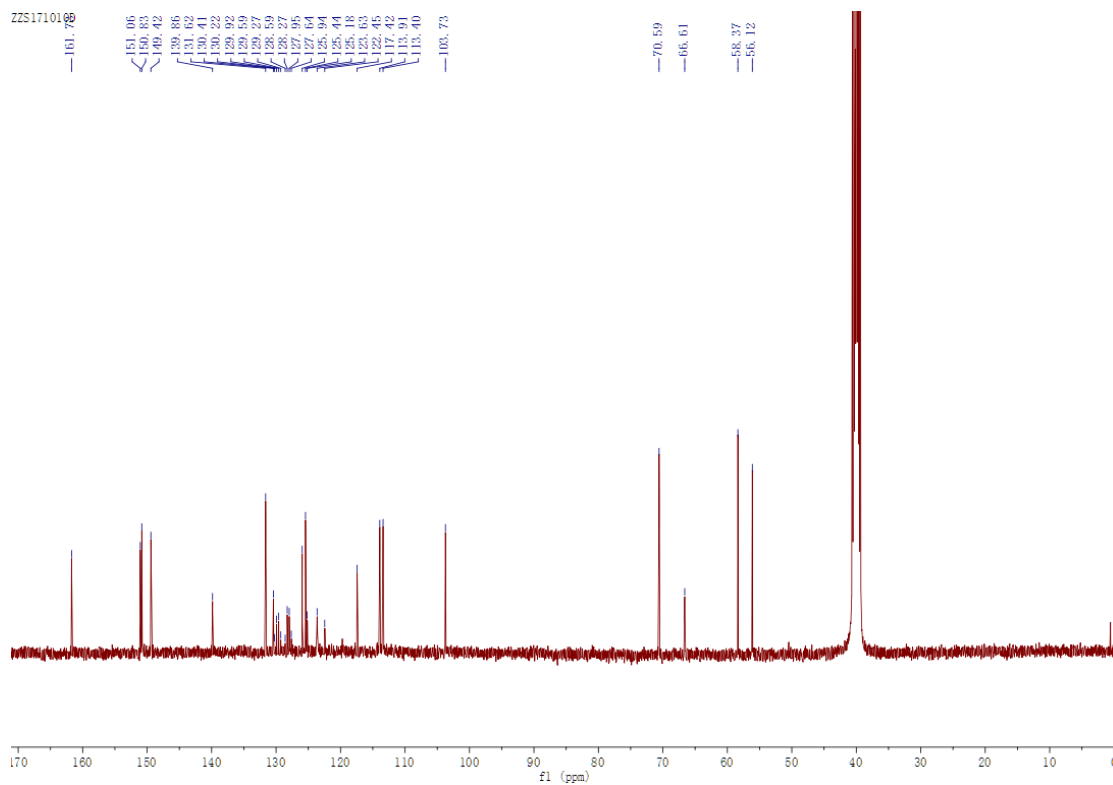

ZZ50701-1

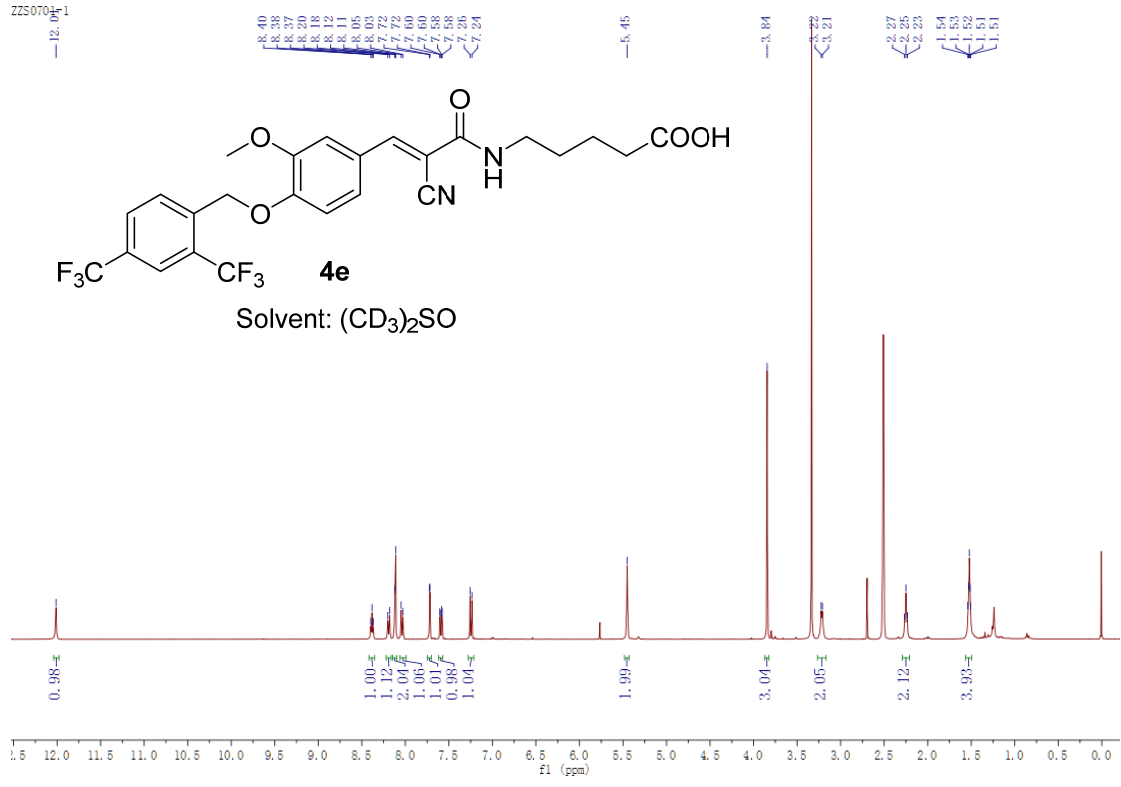

ZZ5180701C

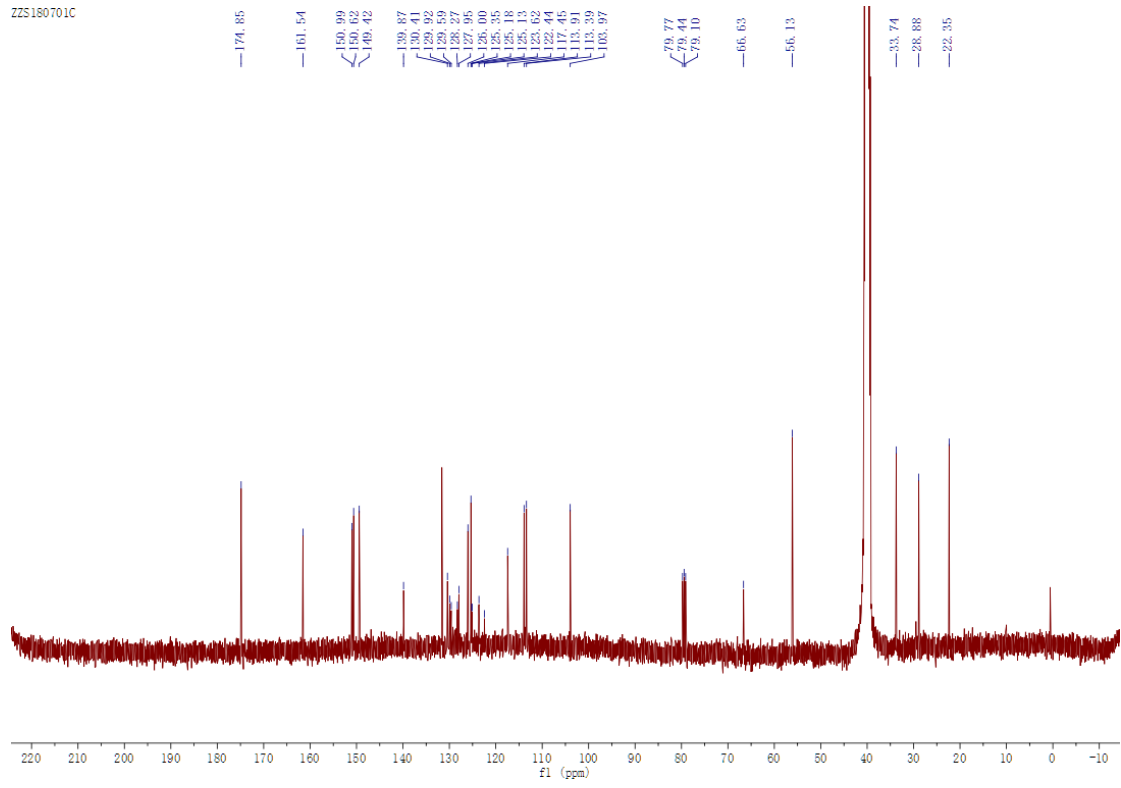

ZZS171122-1D

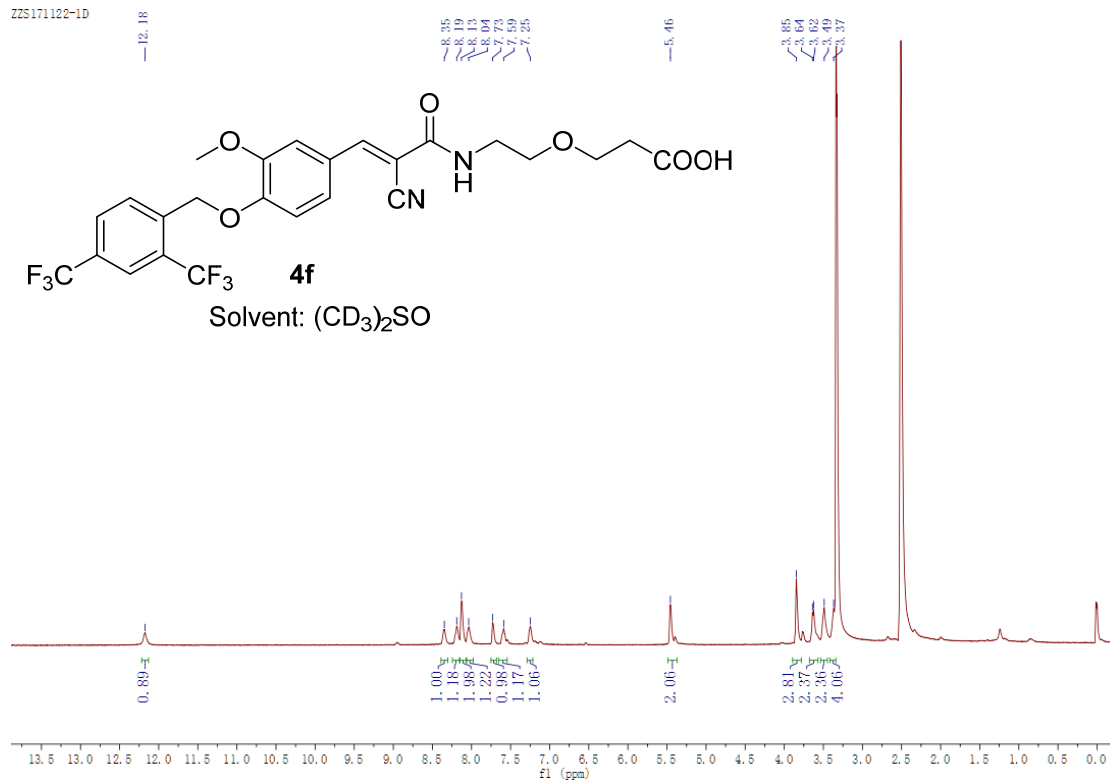

ZZS171122-1D

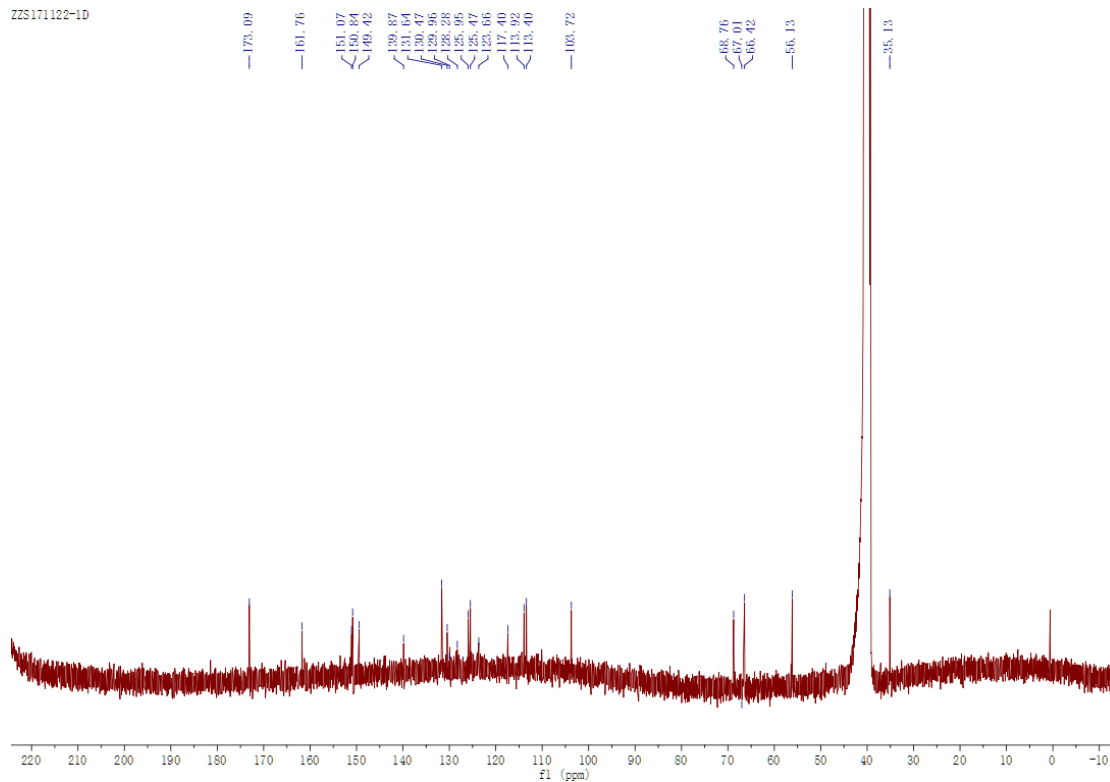

ZZ5171212-2

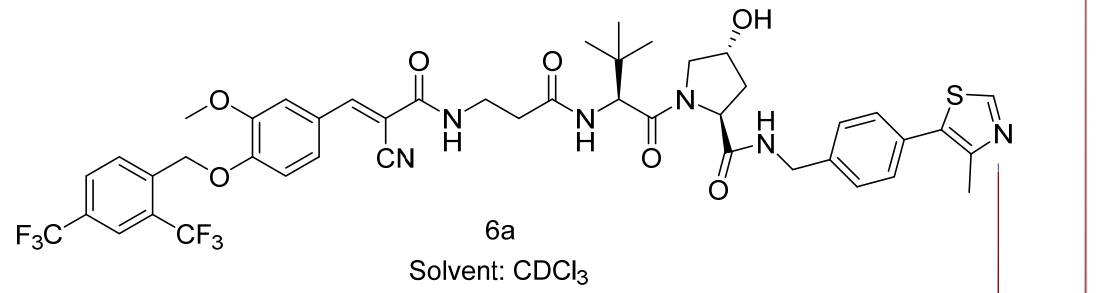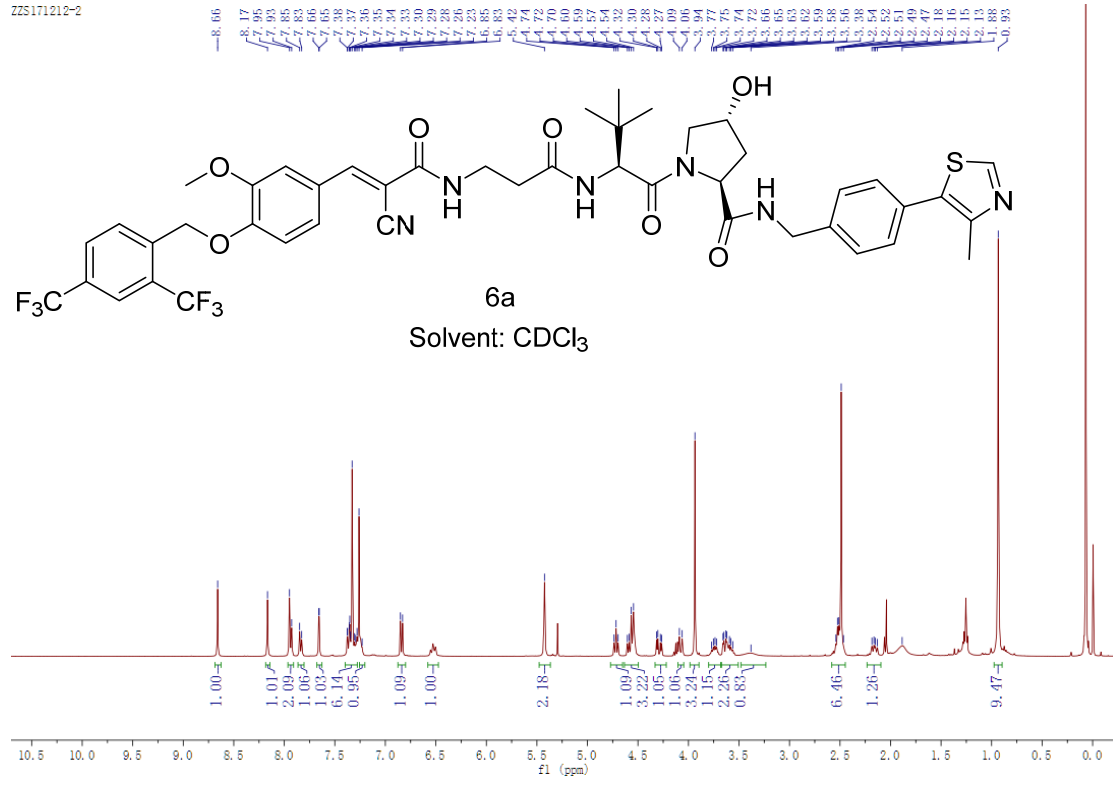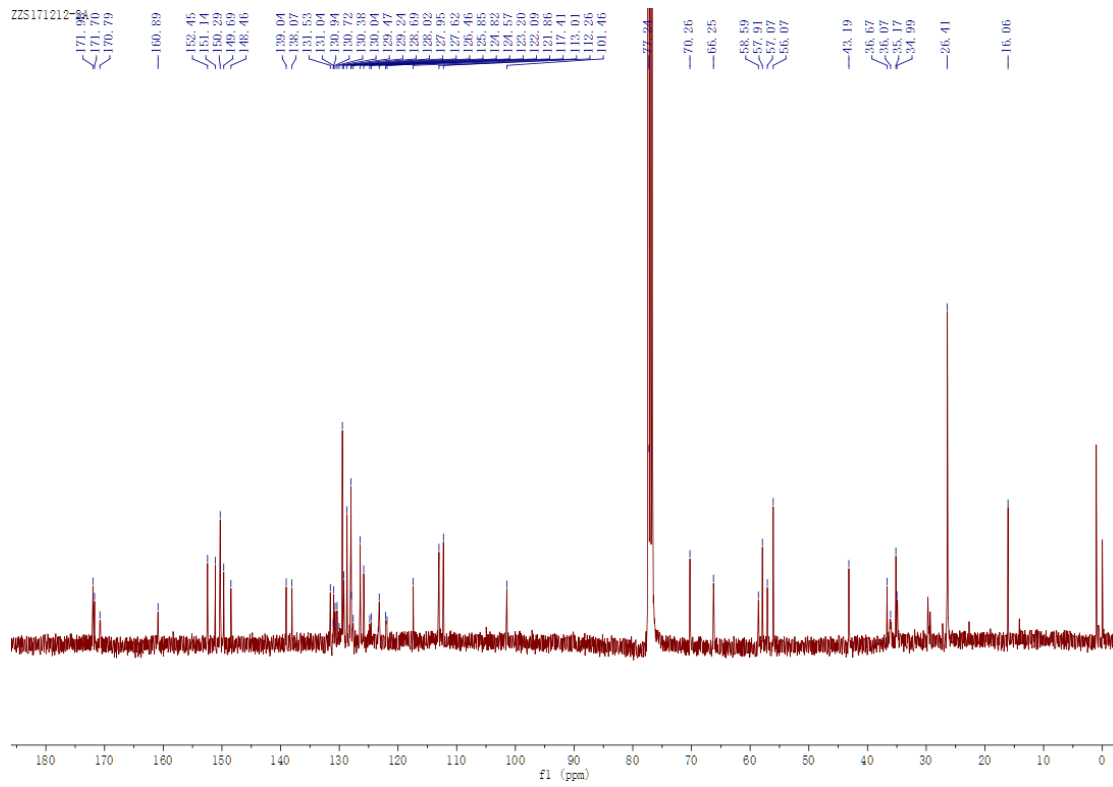

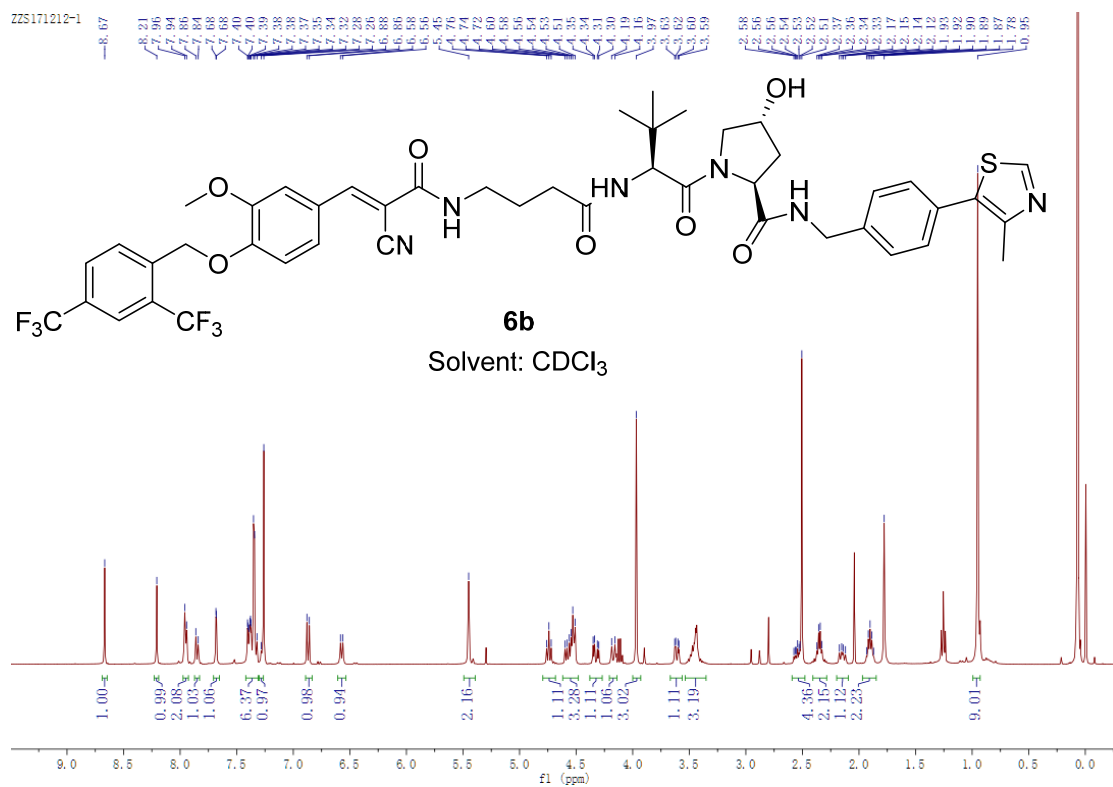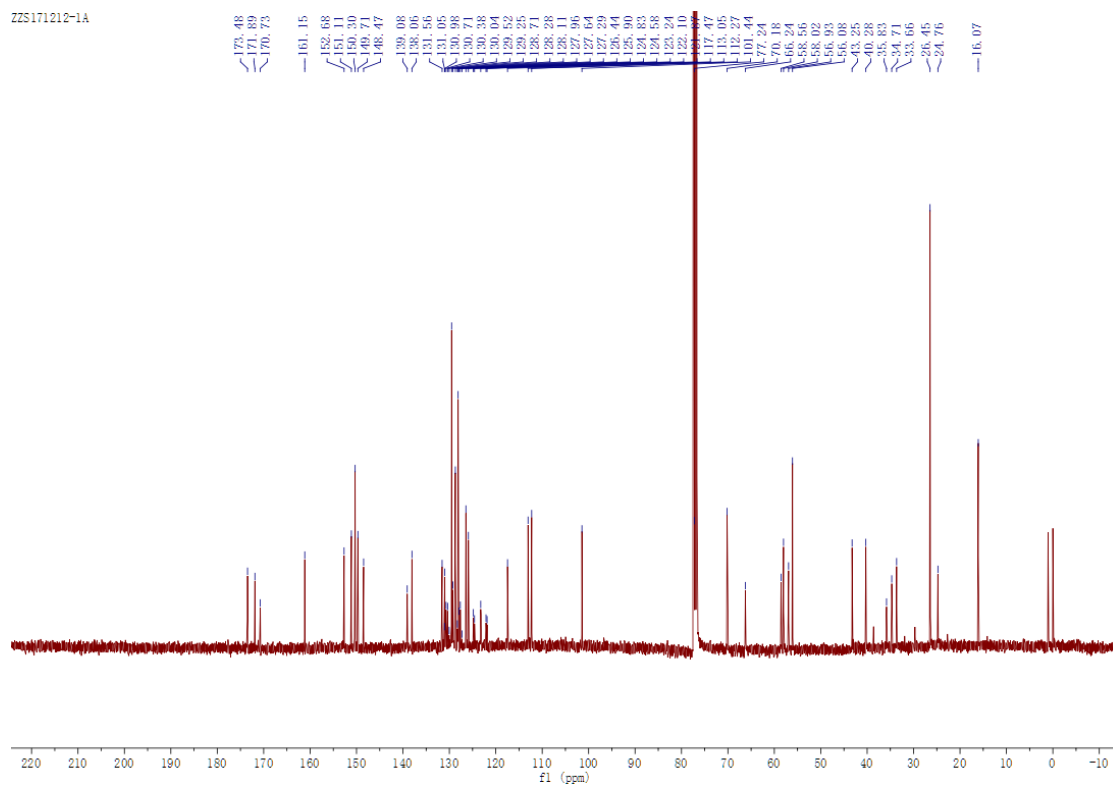

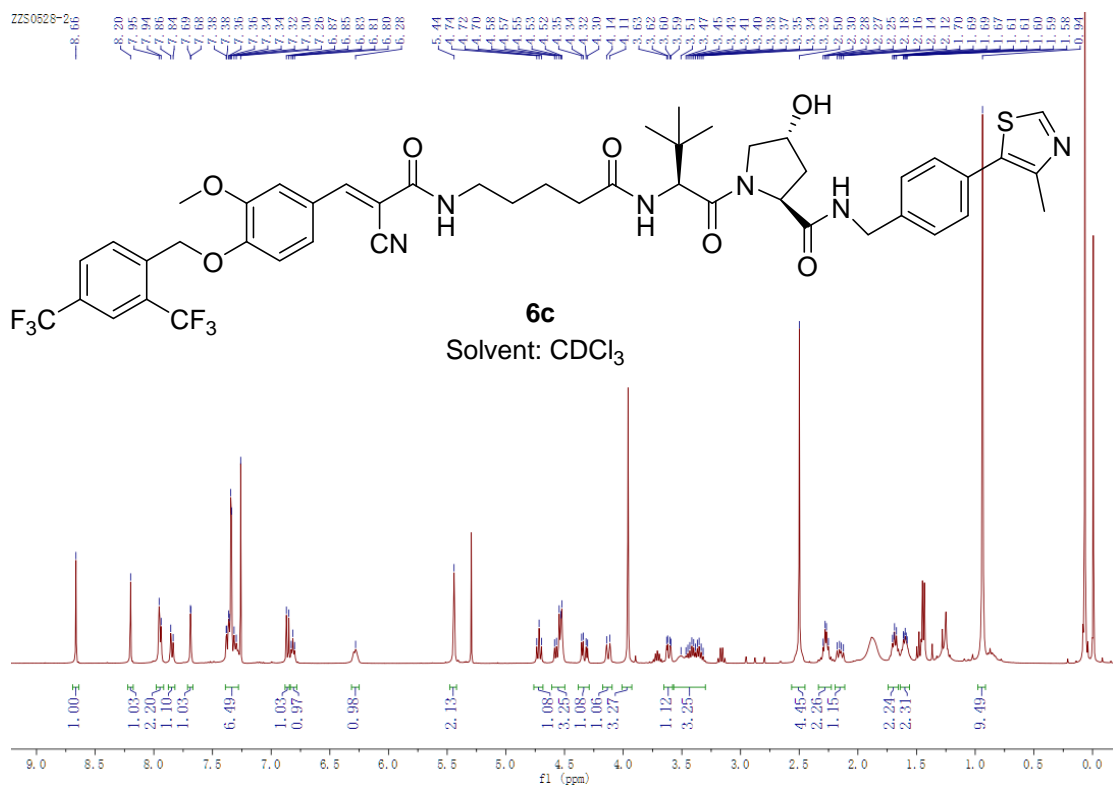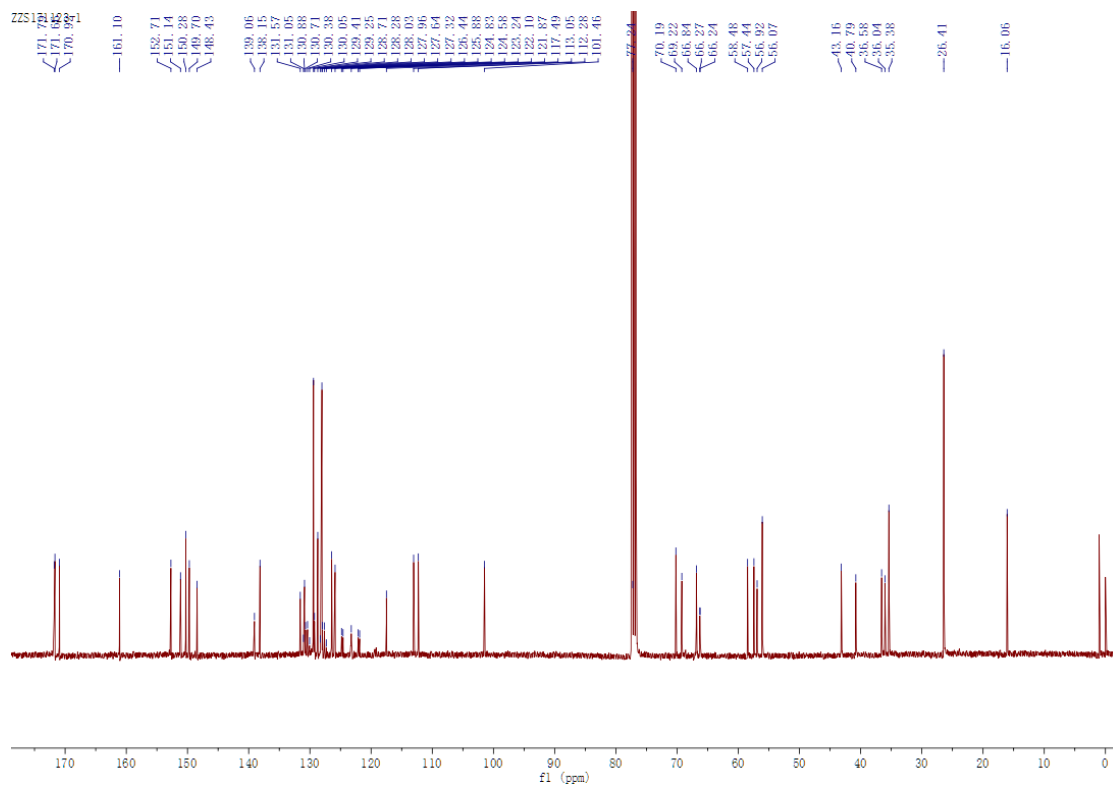

ZZ5171124

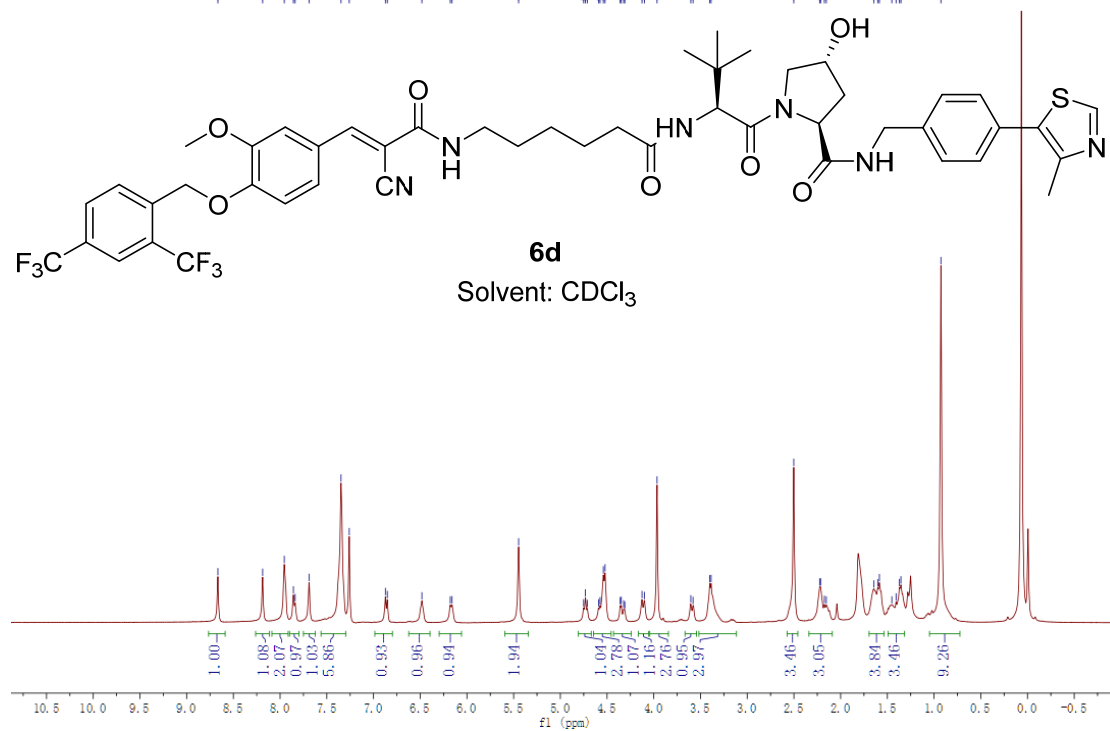

ZZ5171124A

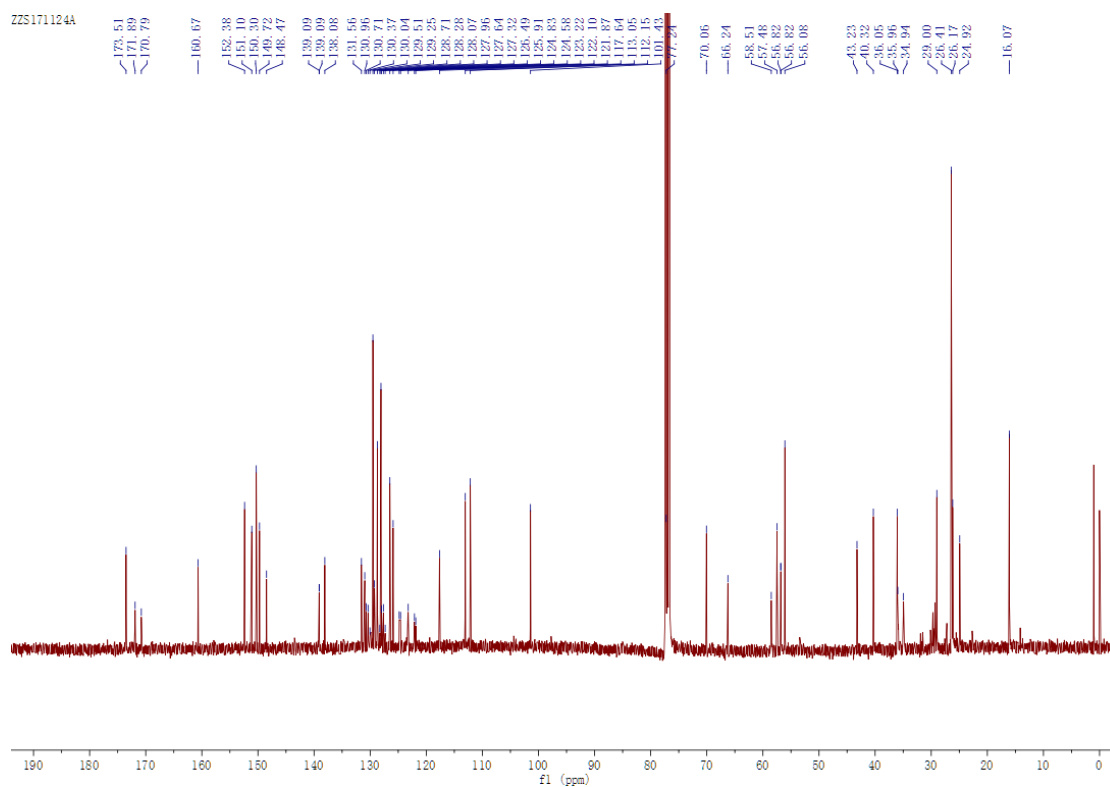

ZZS180622-1

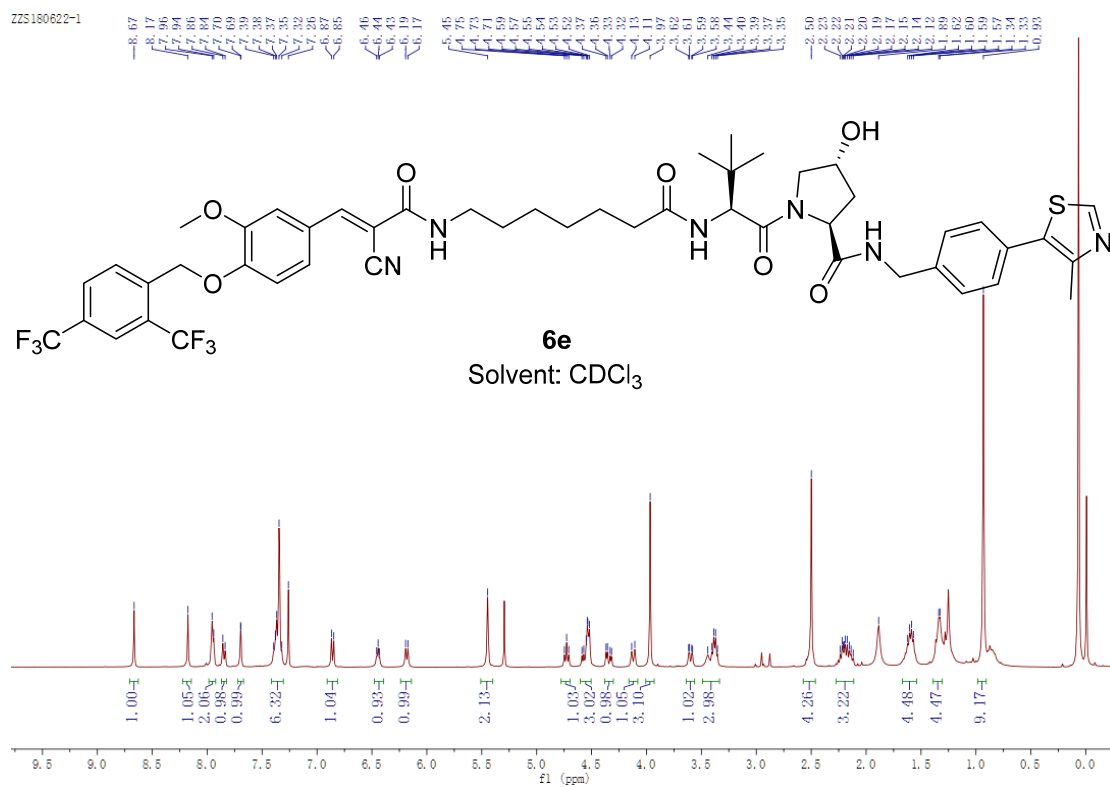

ZZS180622-1

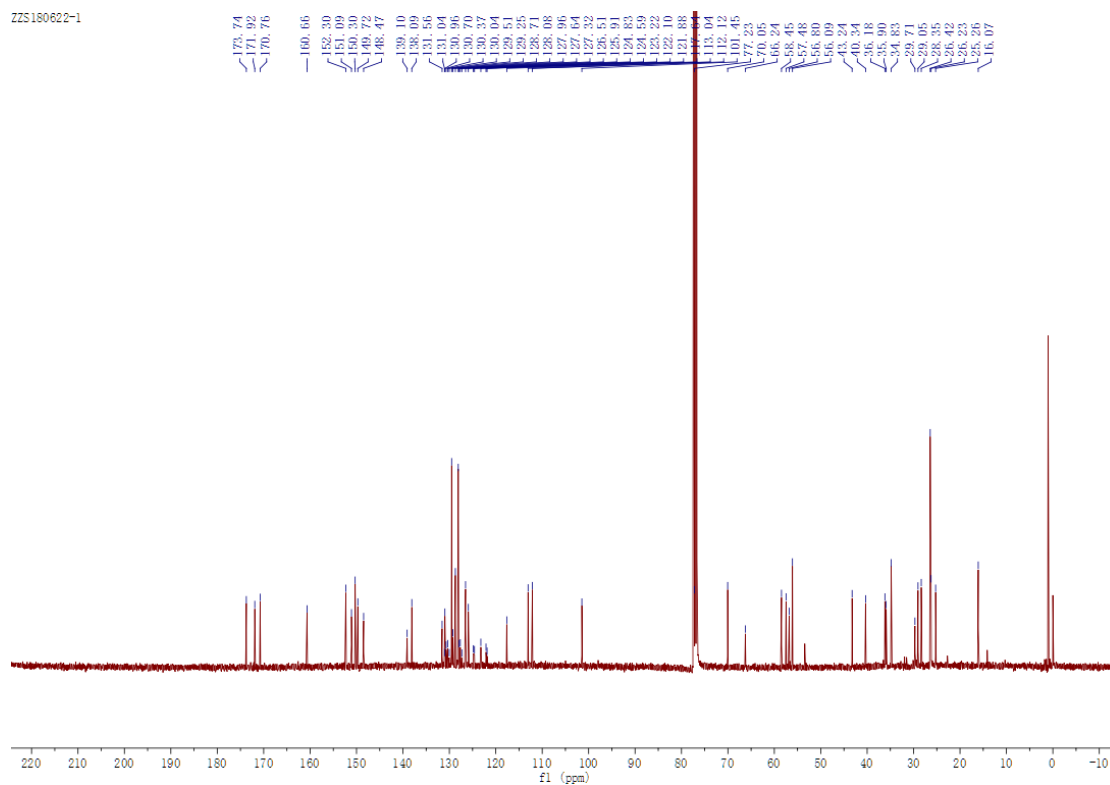



ZZ5180622-2

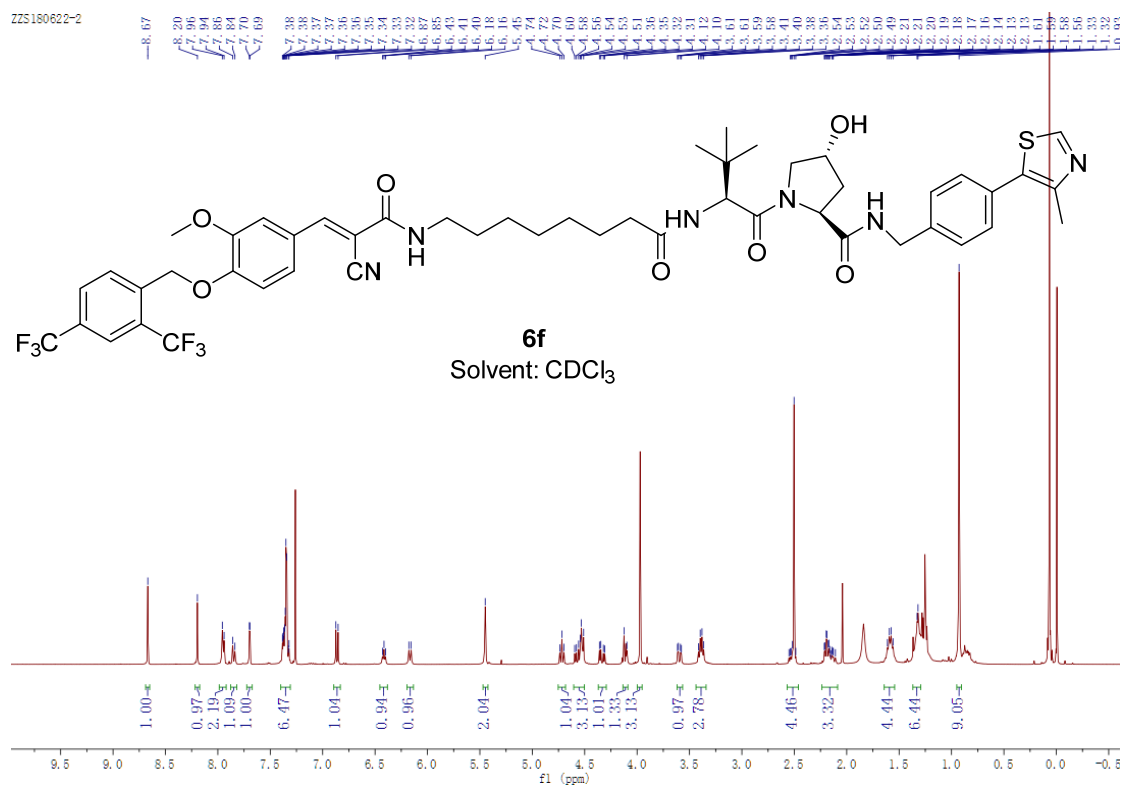

ZZ5180622-2B

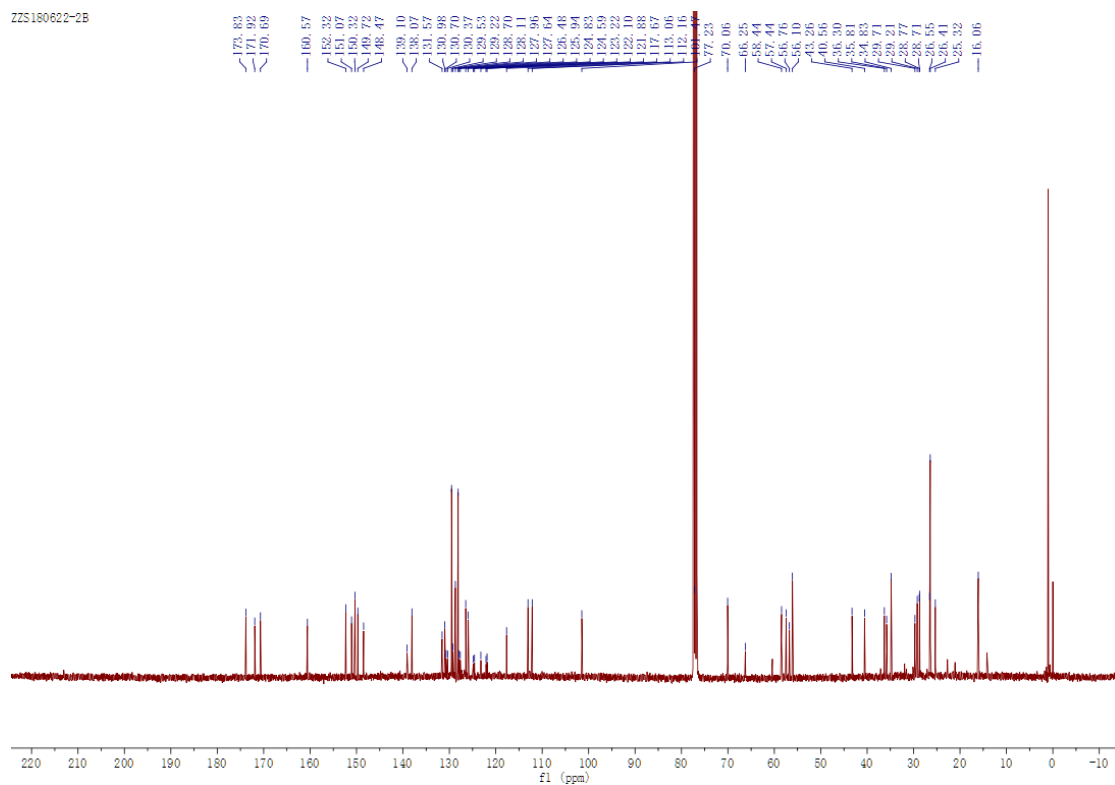

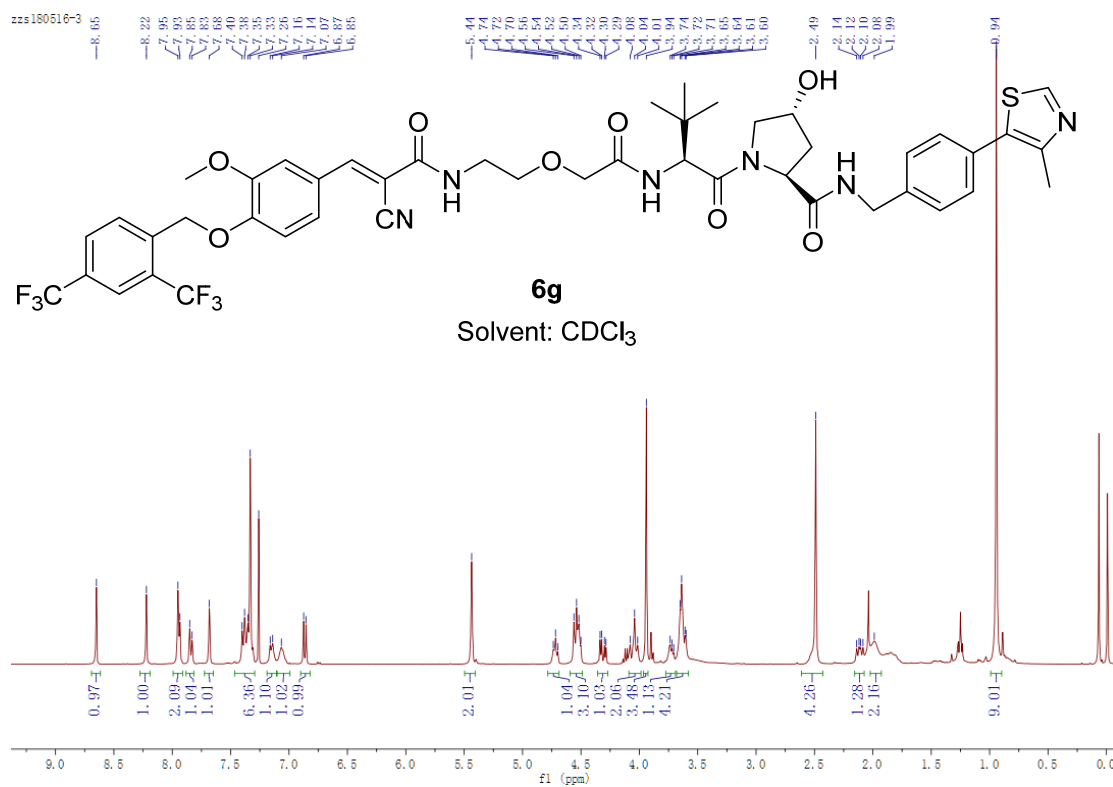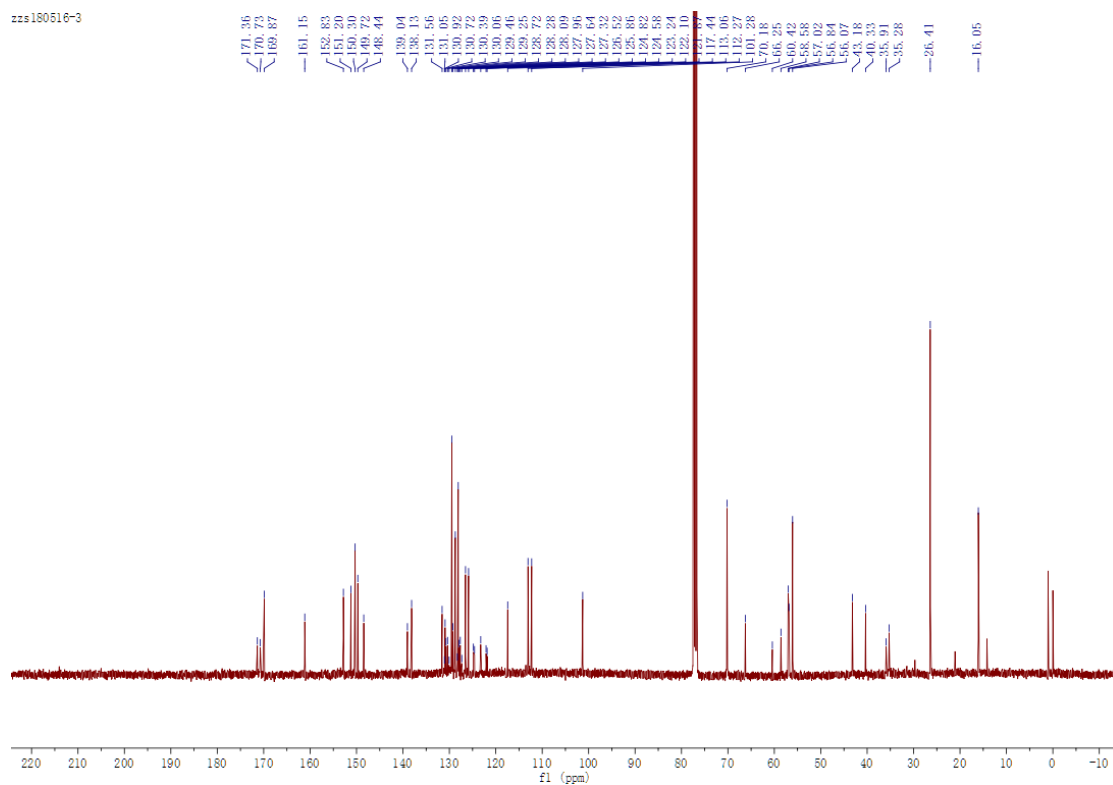

ZZS171123-1

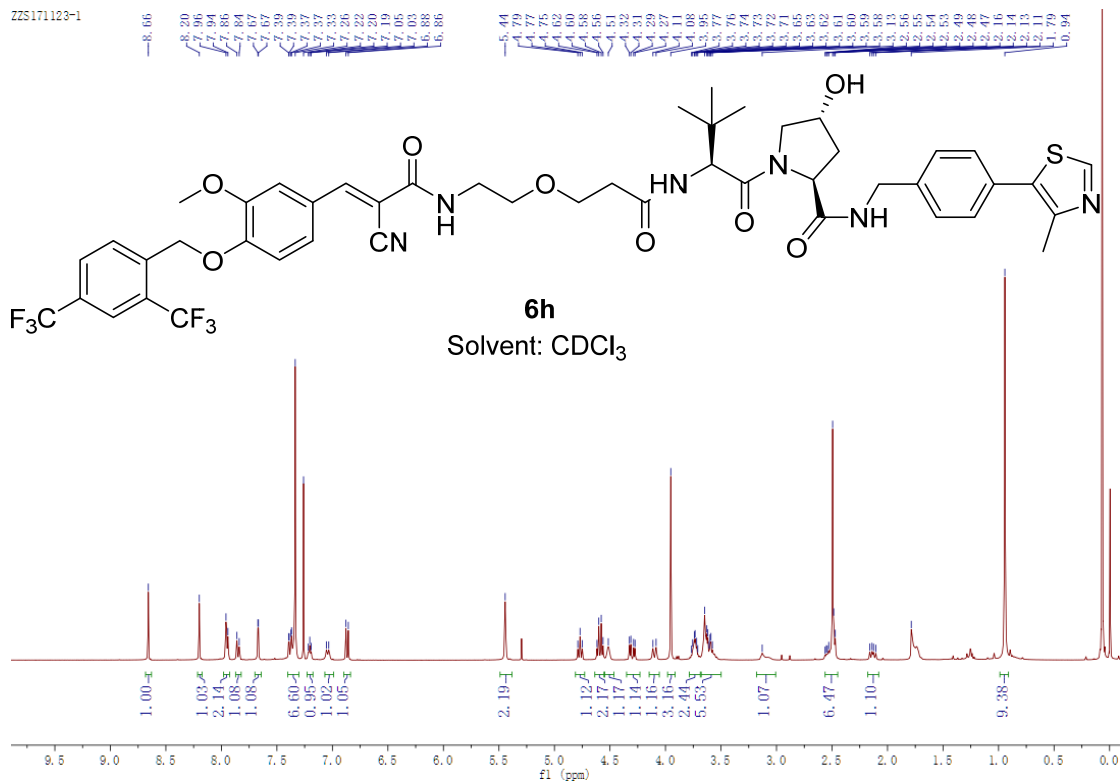

ZZS171123-1

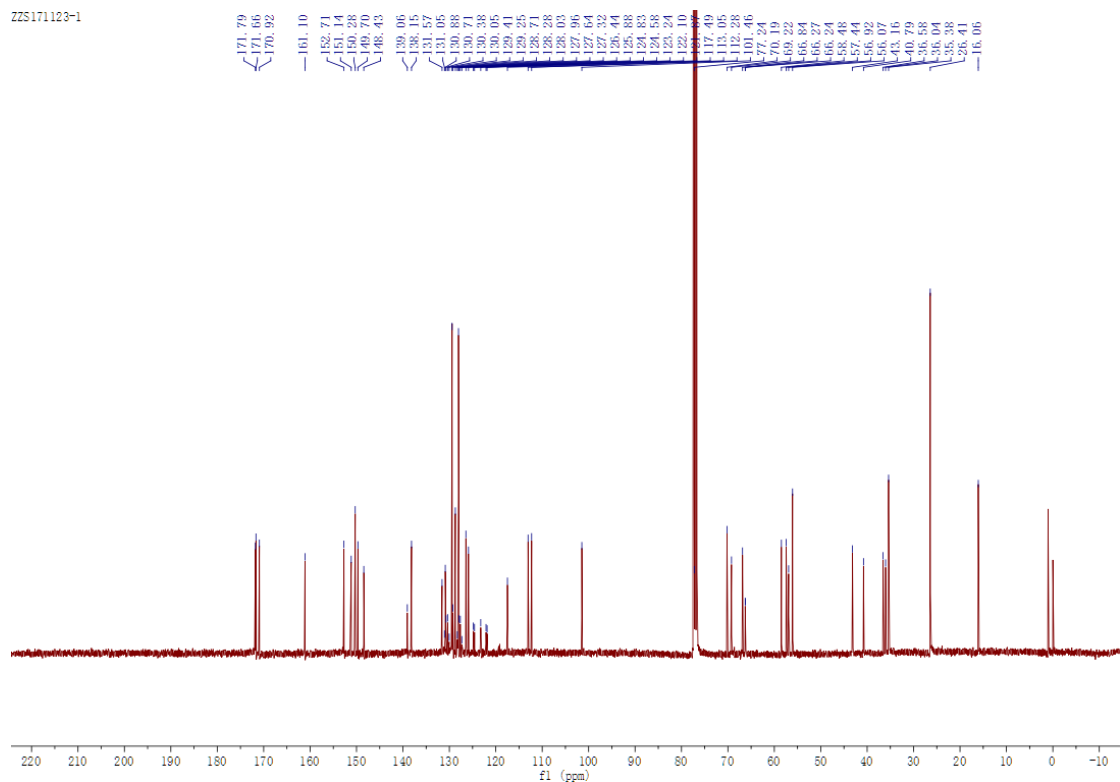

ZZS171214-1

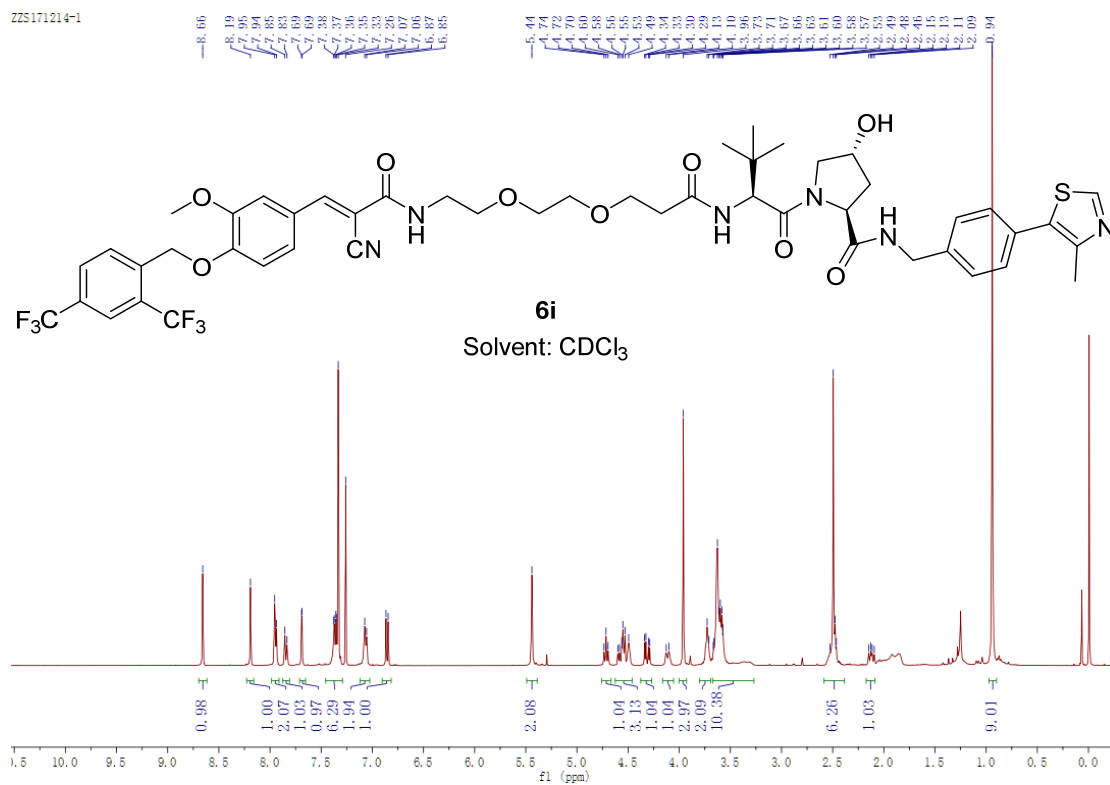

ZZS171214-1

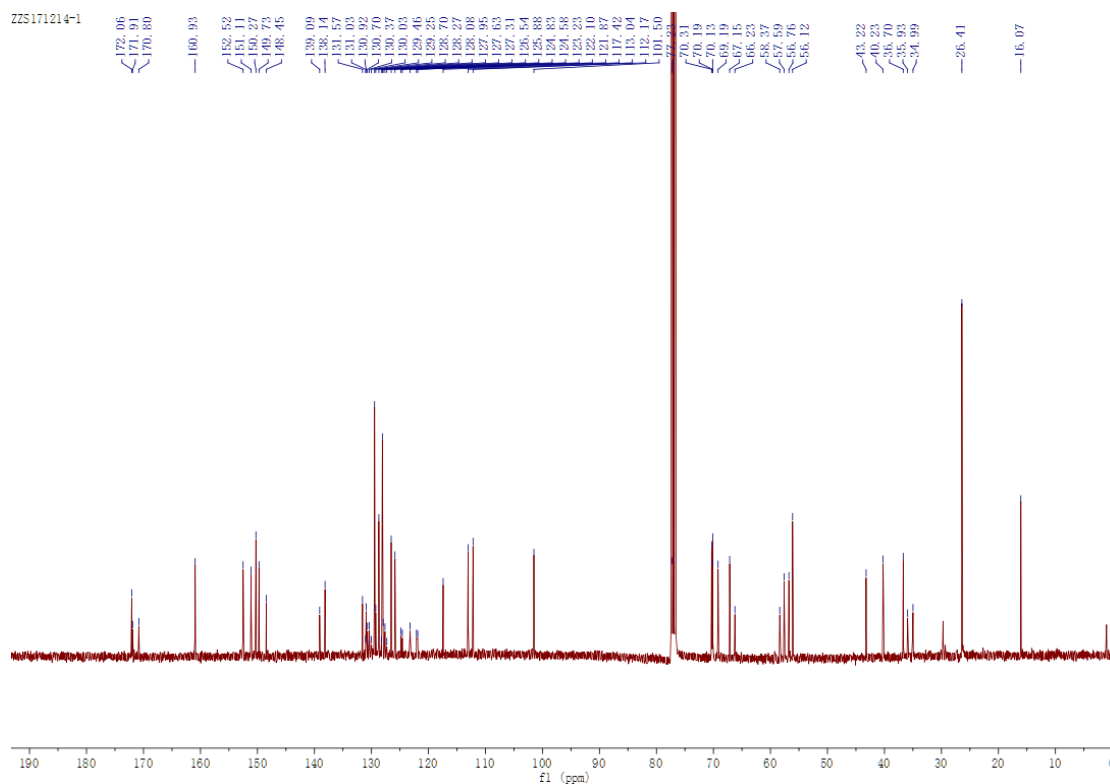

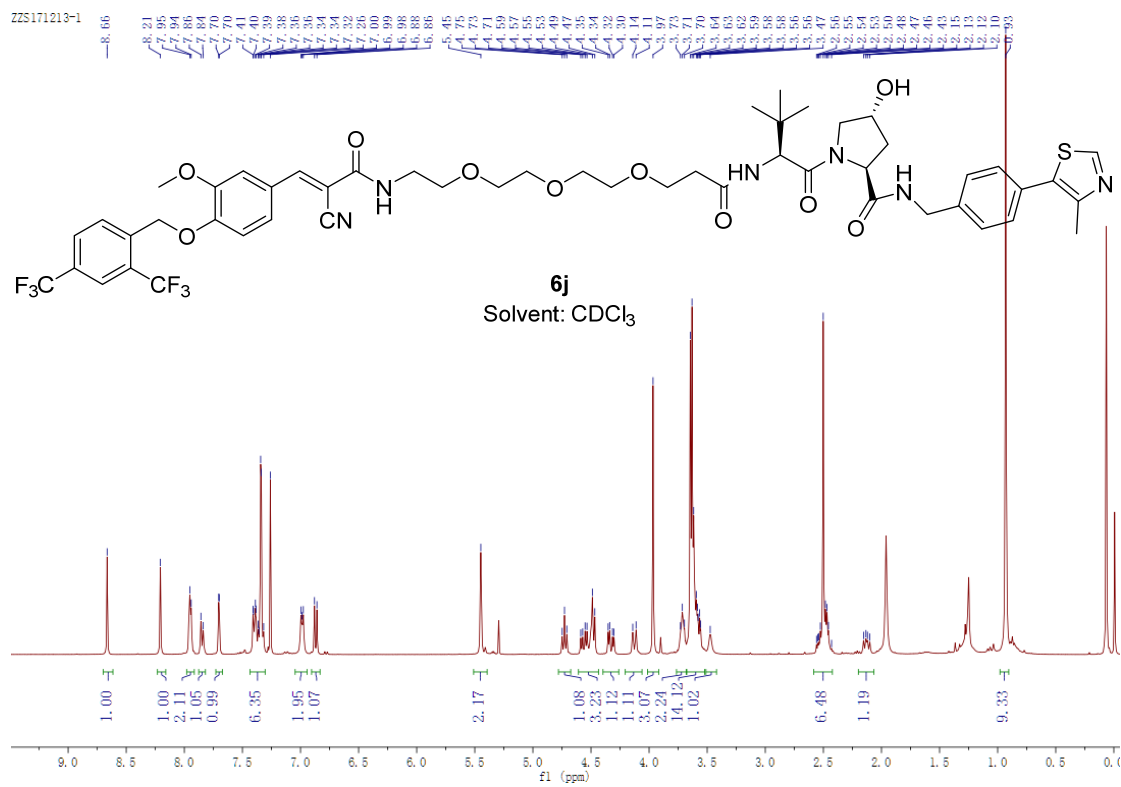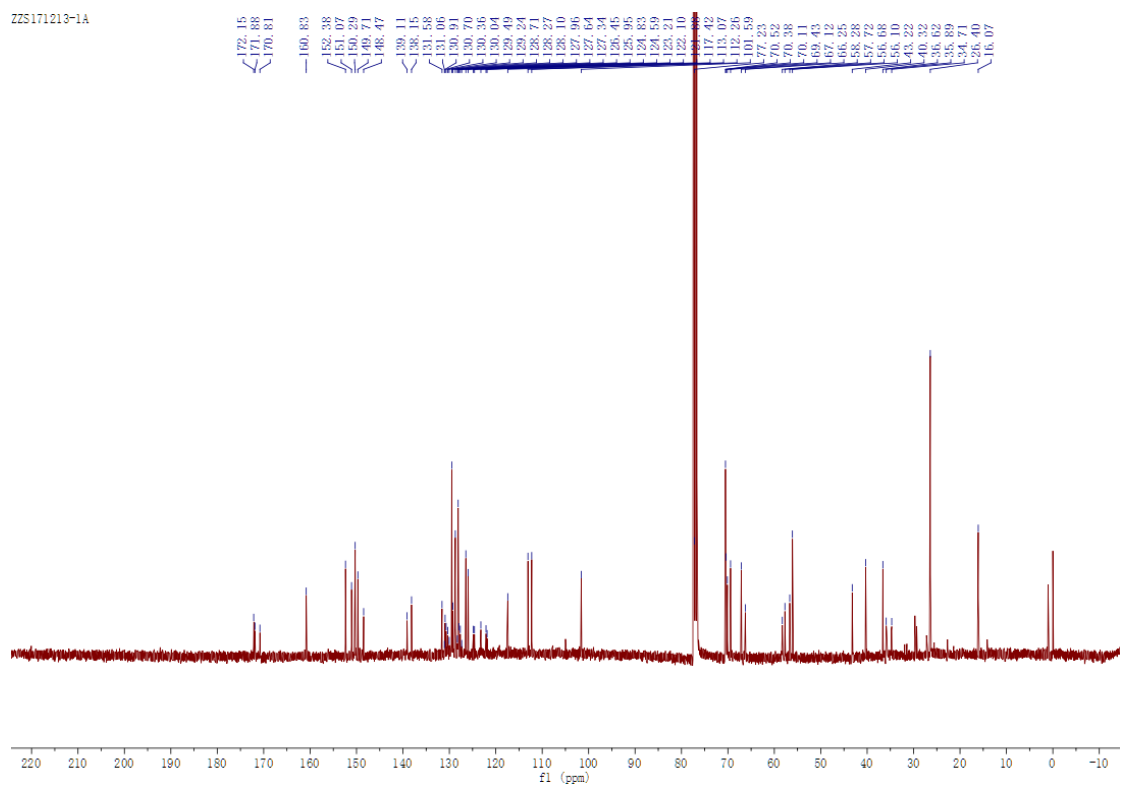

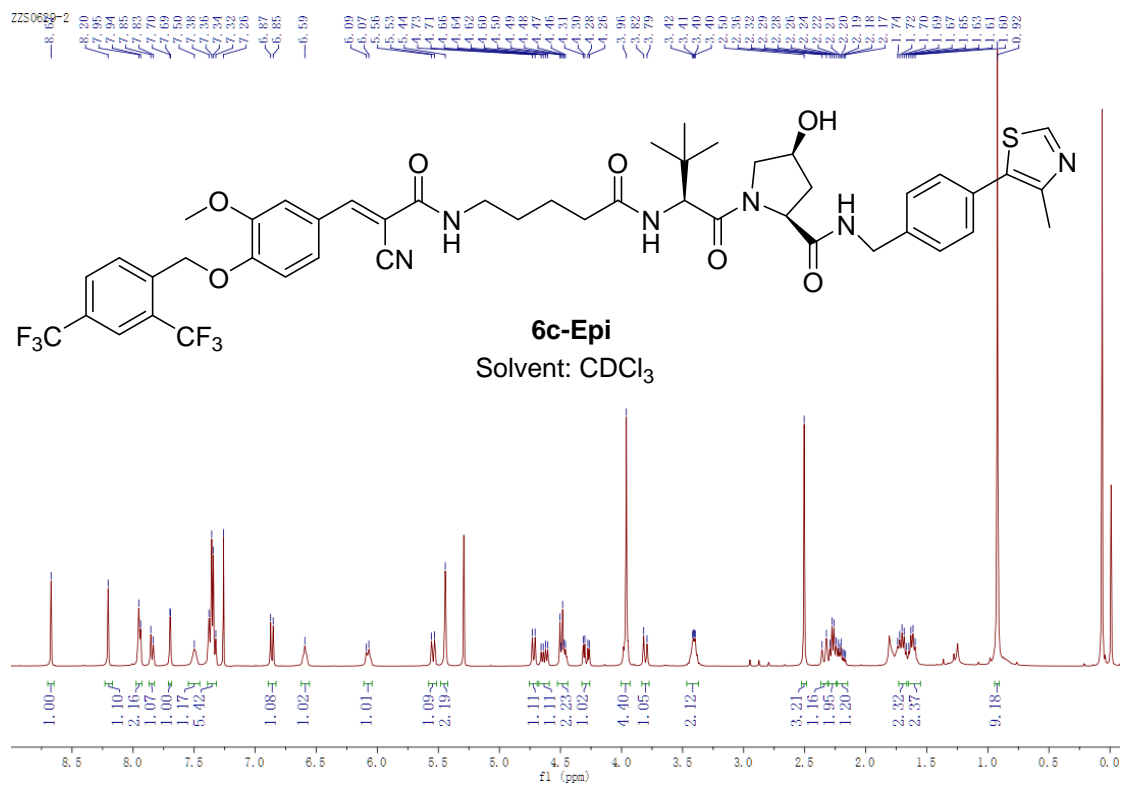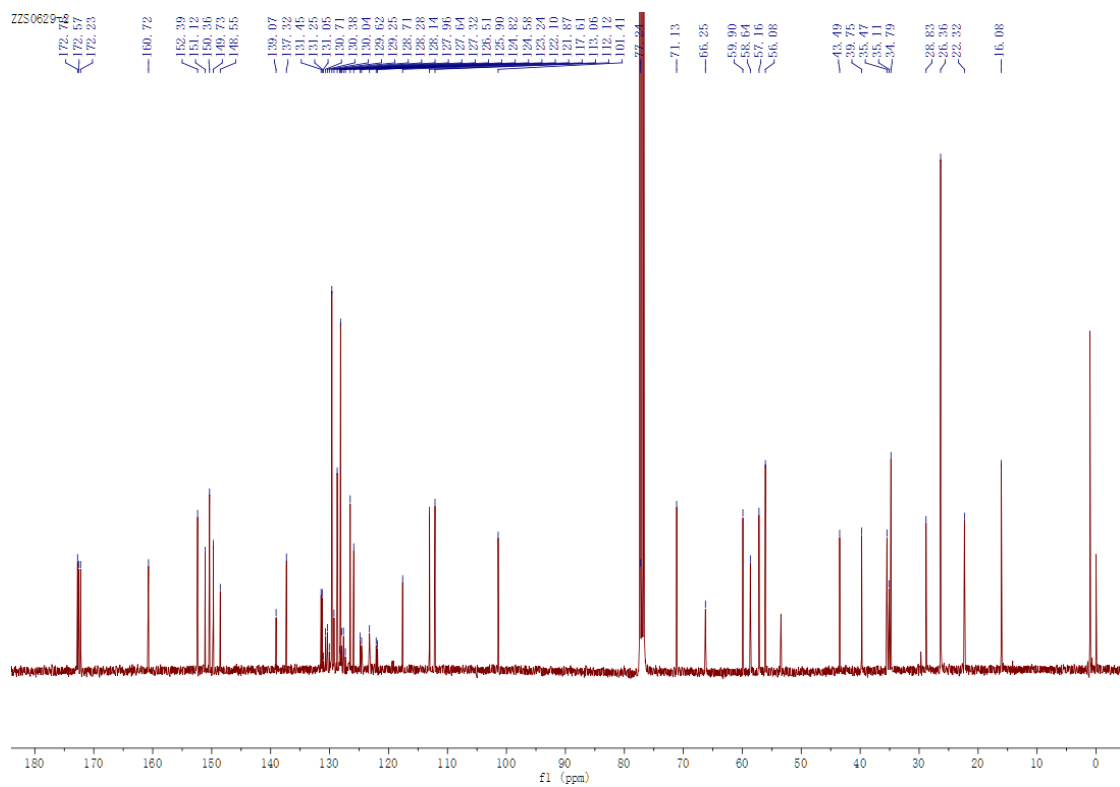

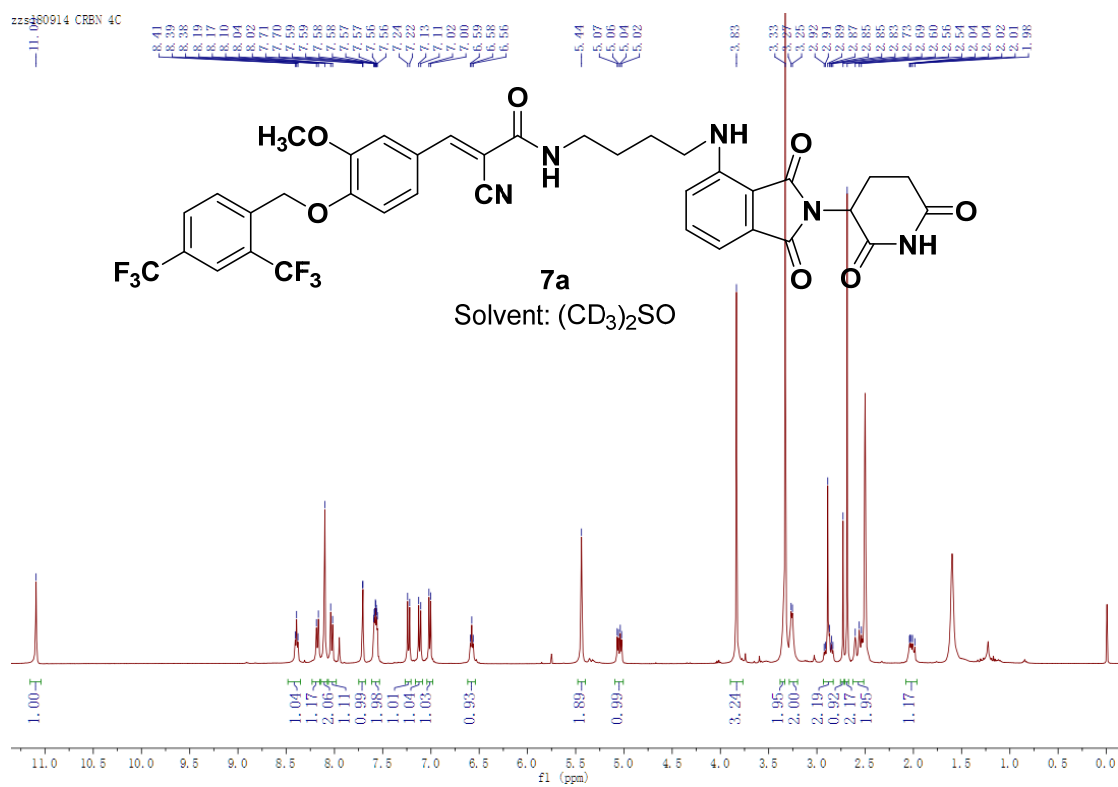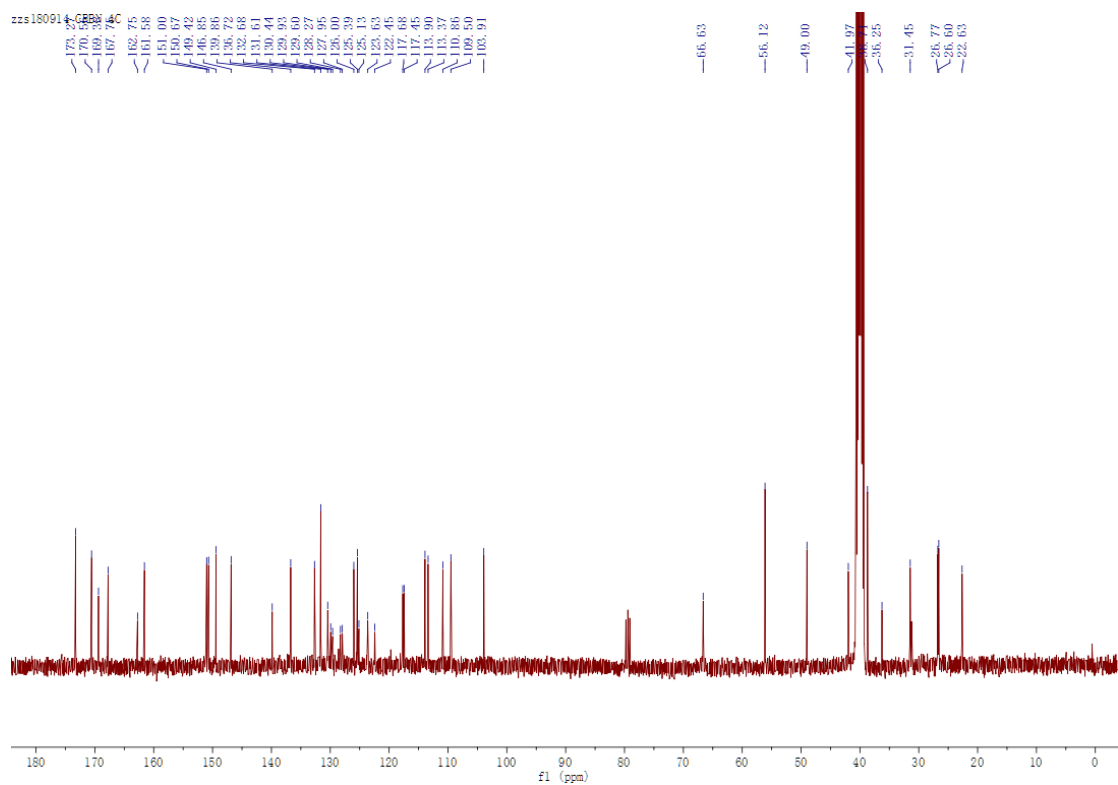

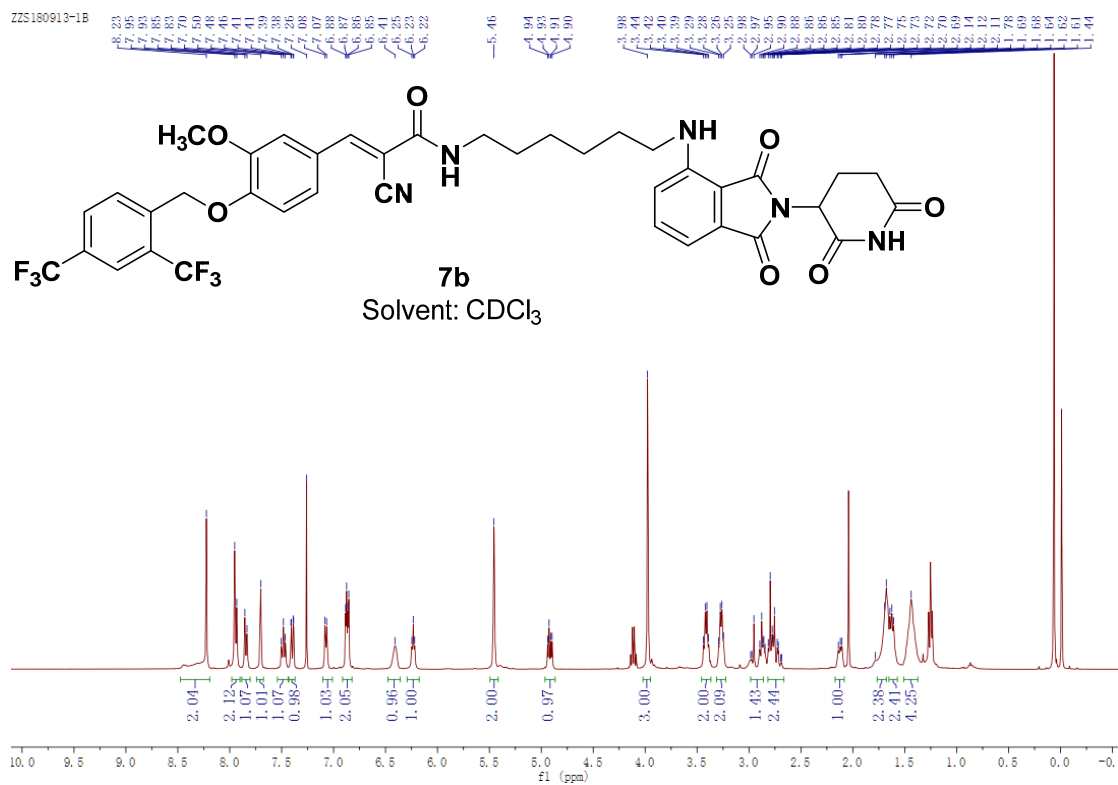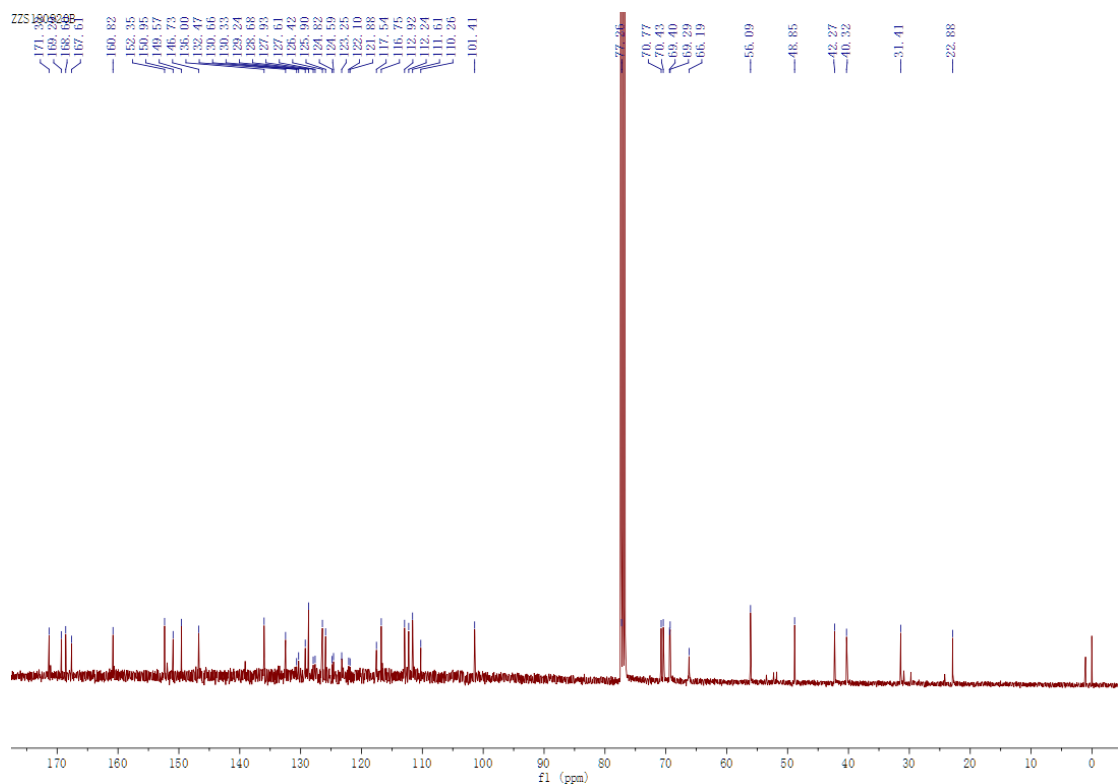



ZZS180920C

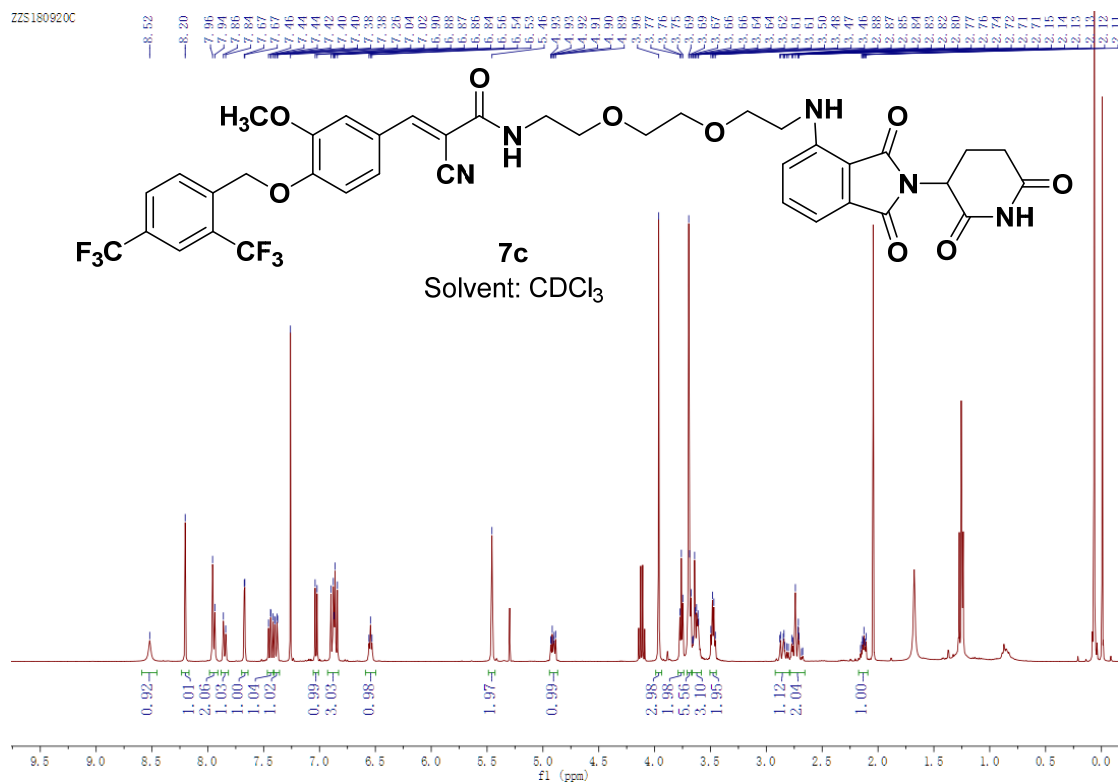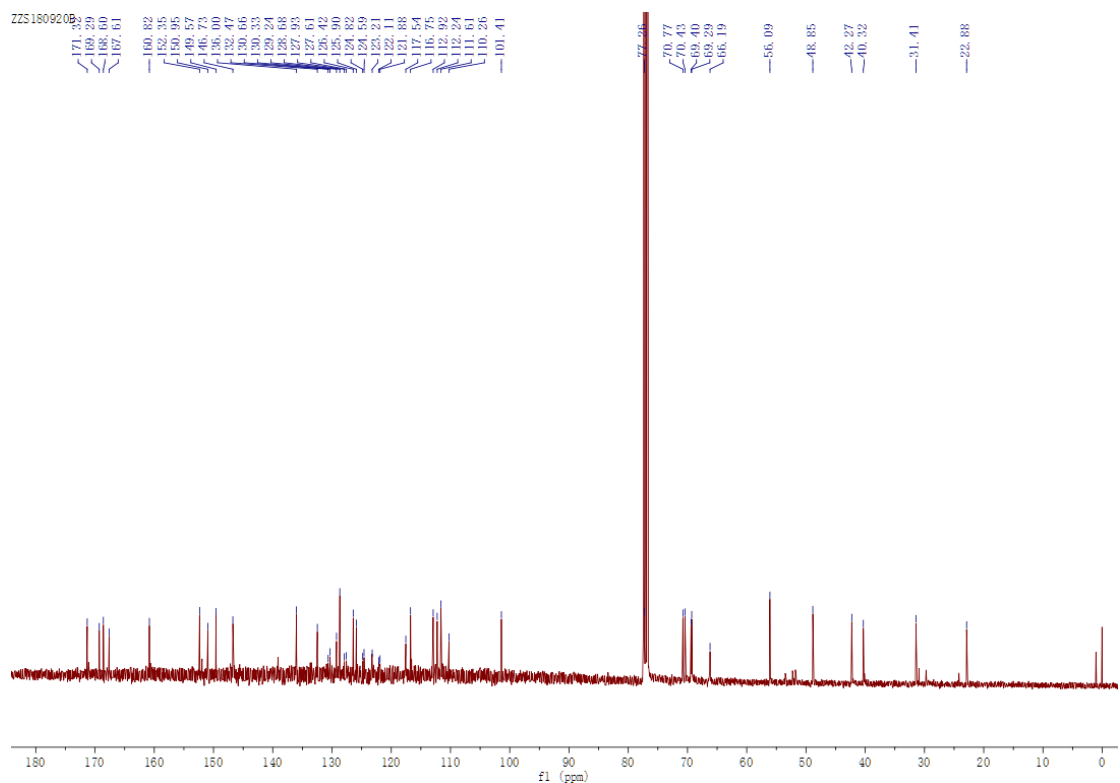



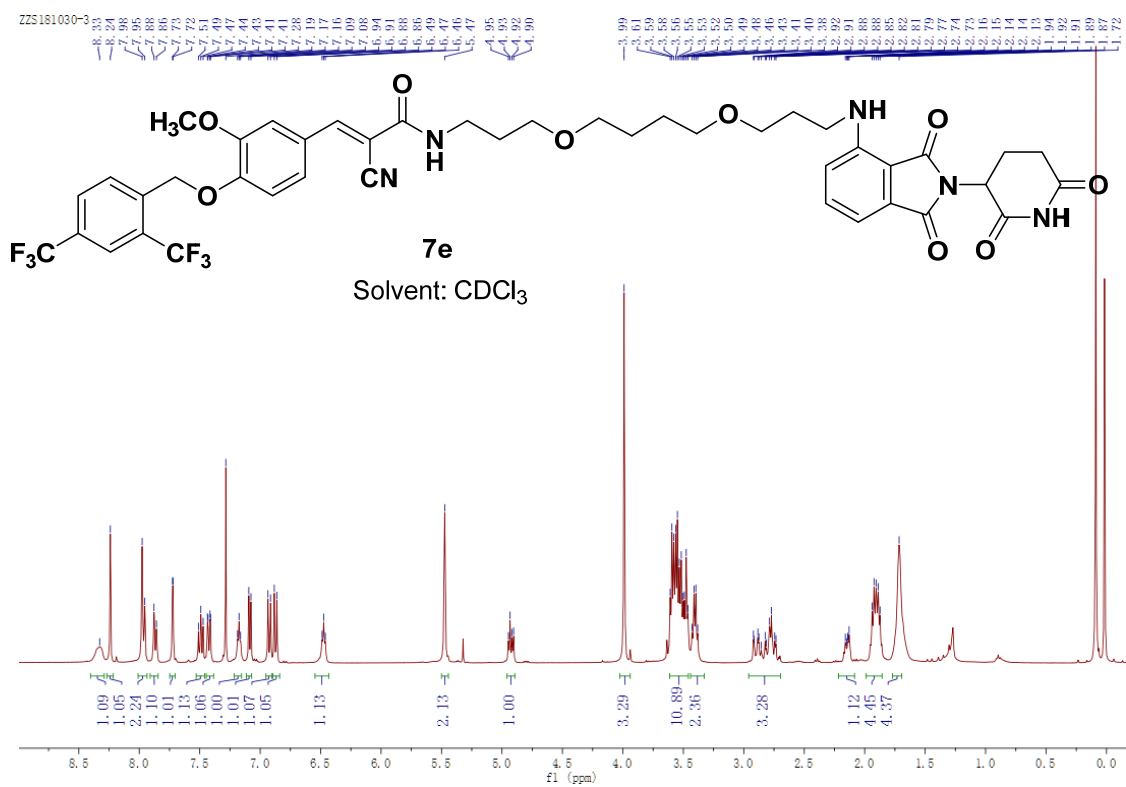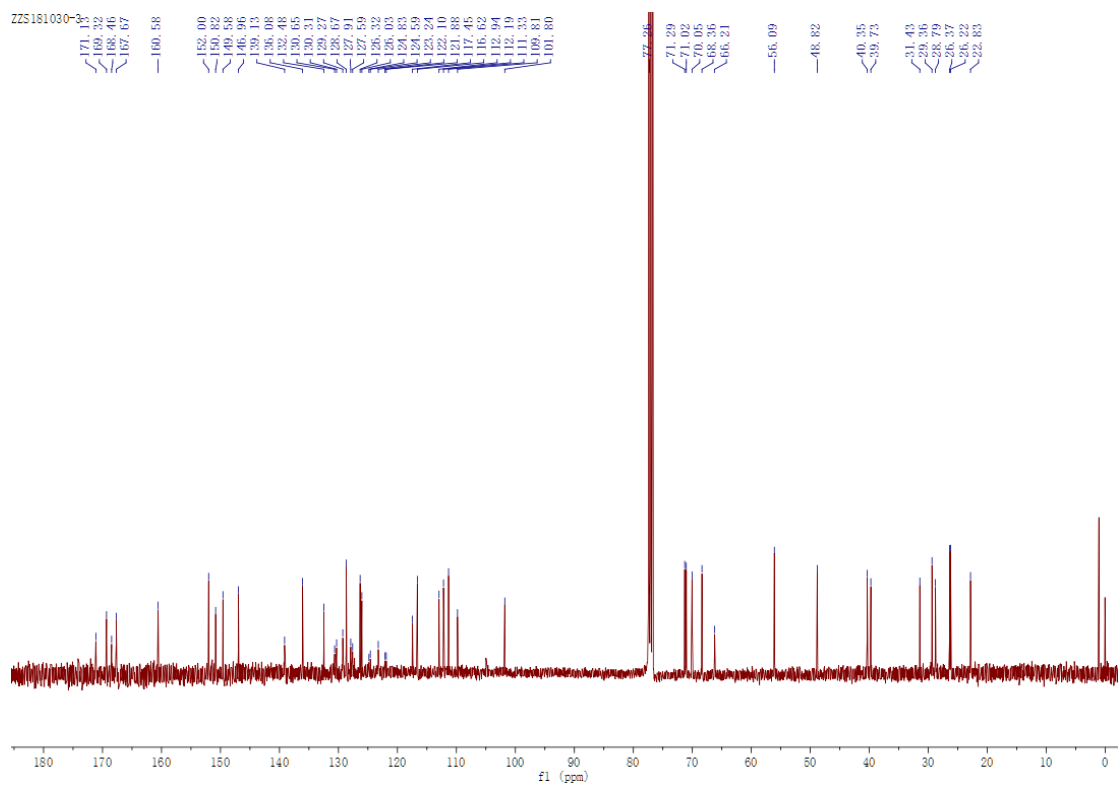



ZZ5181022-3

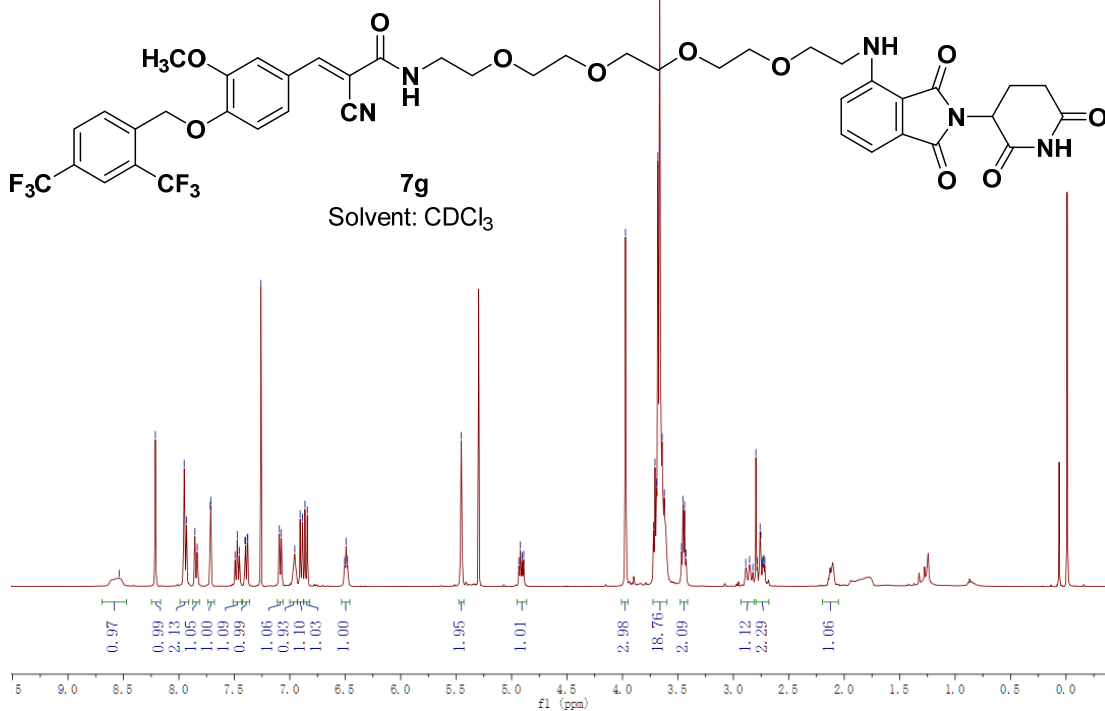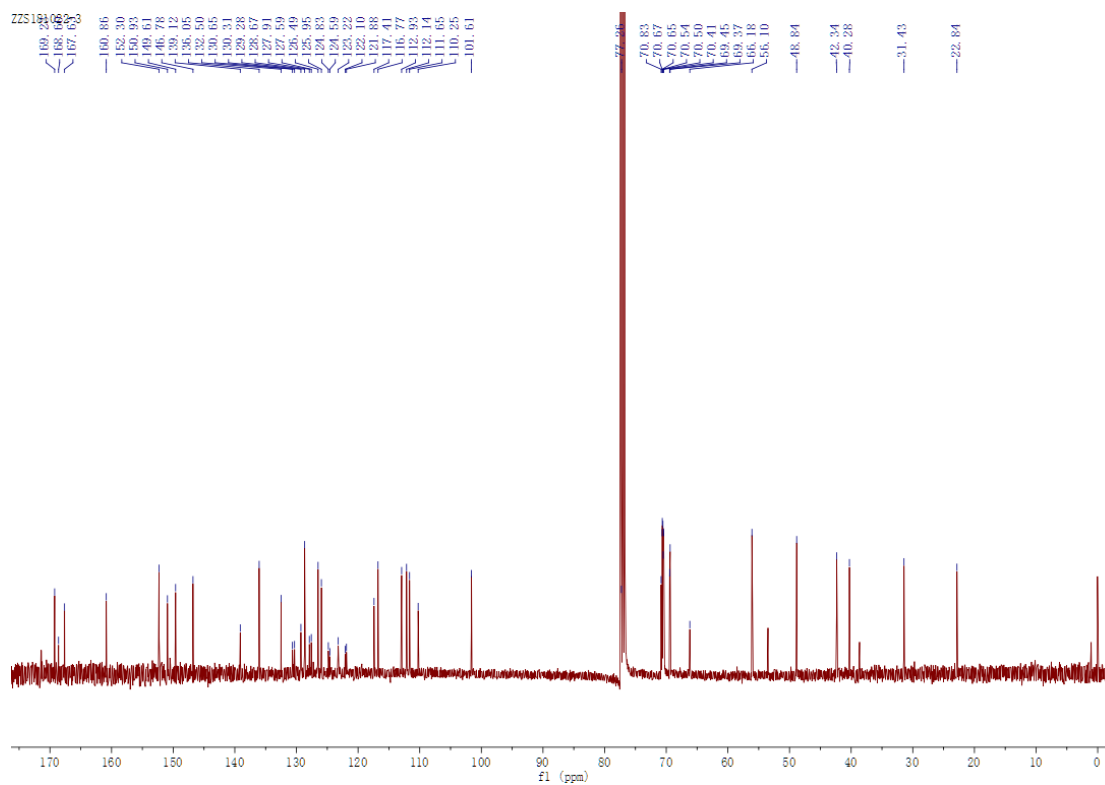

ZZ5181030-1

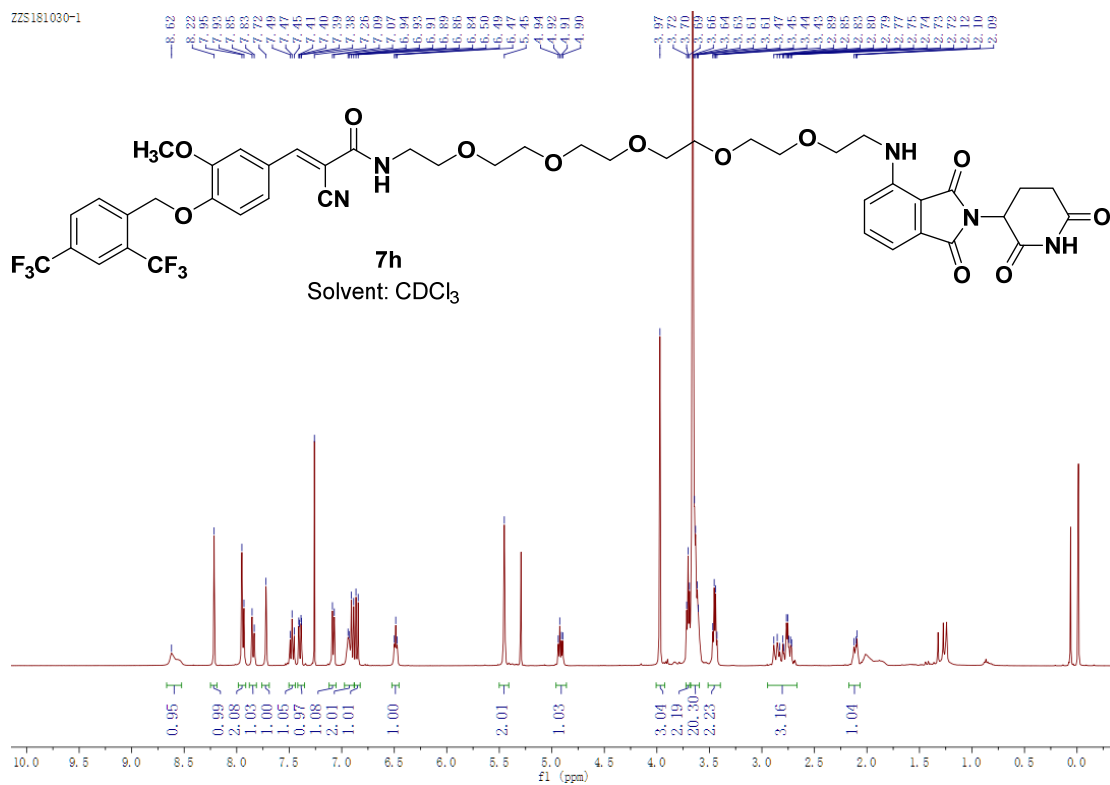

ZZ5181030-1

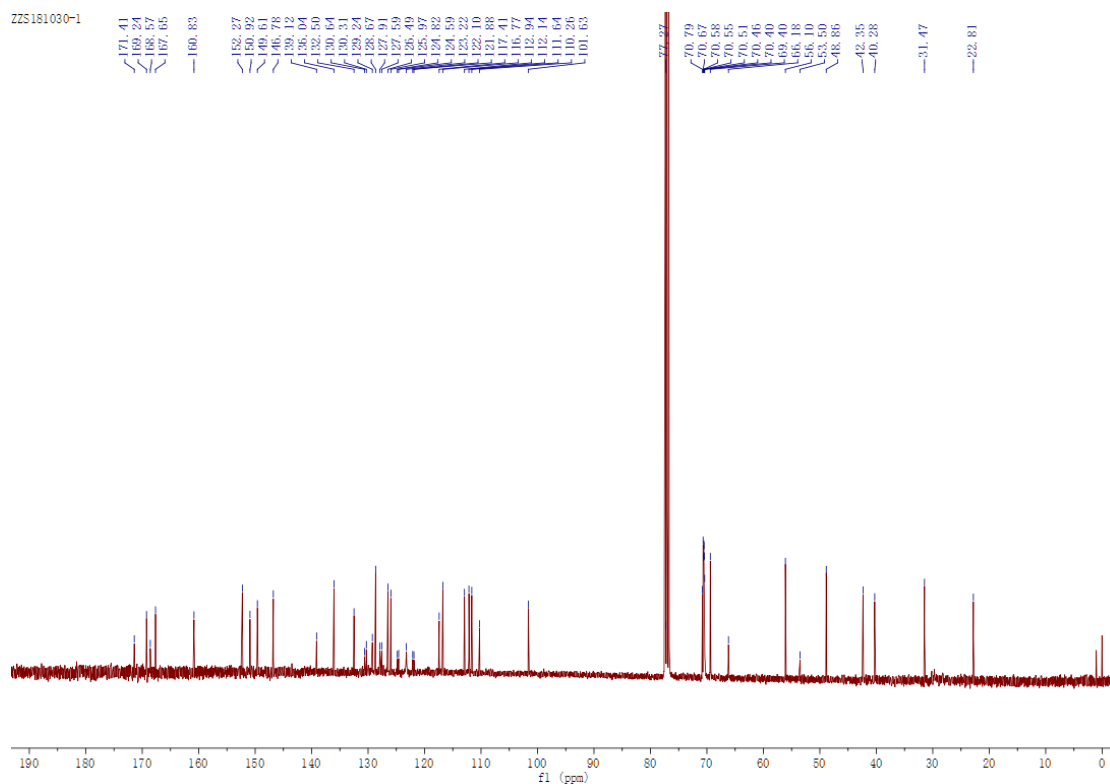

ZZS181202

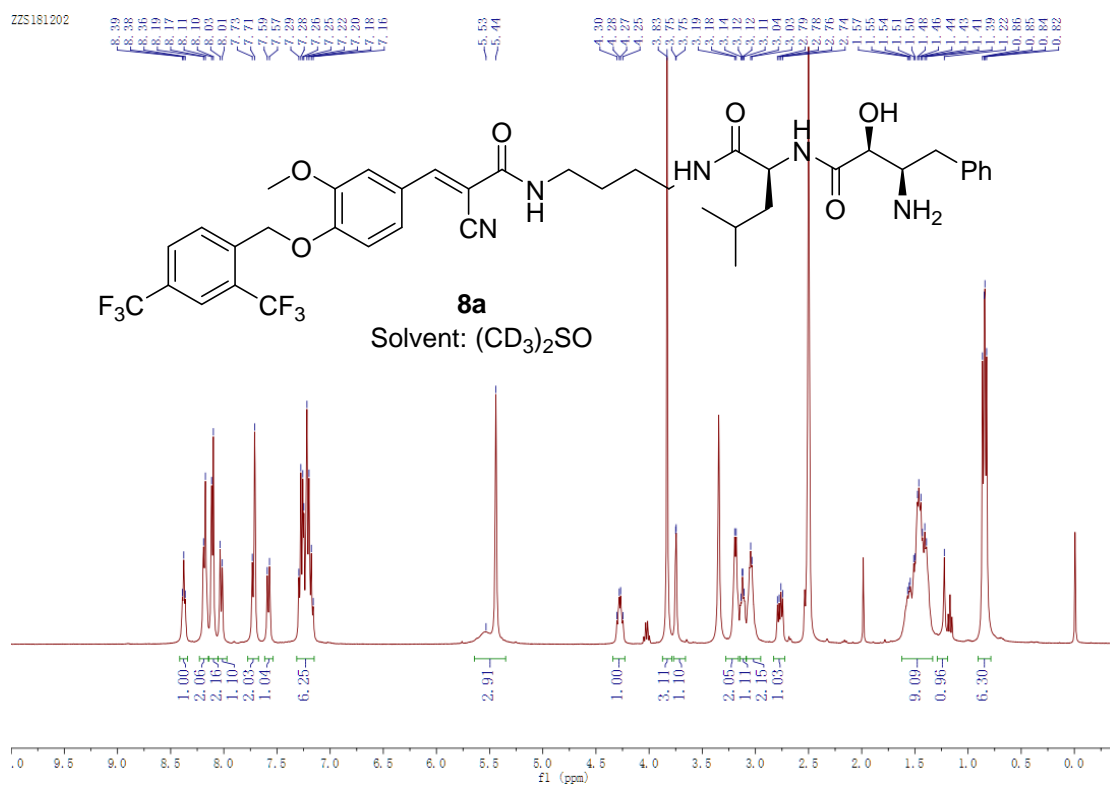

ZZS181202

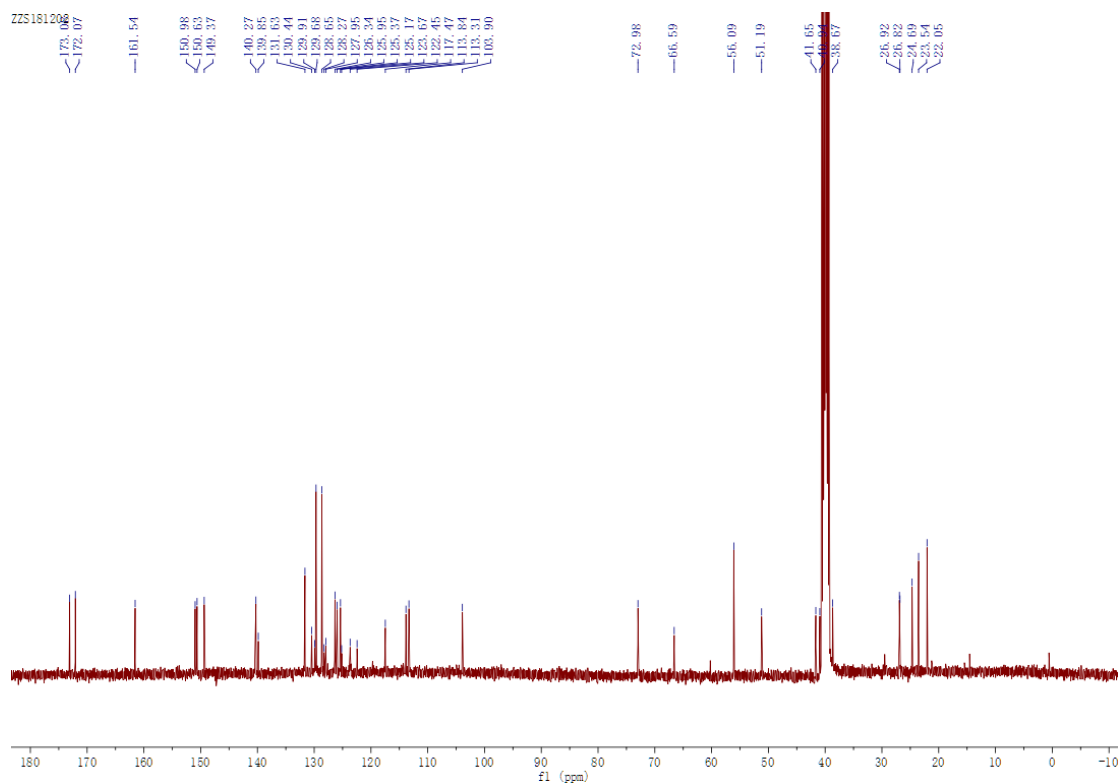

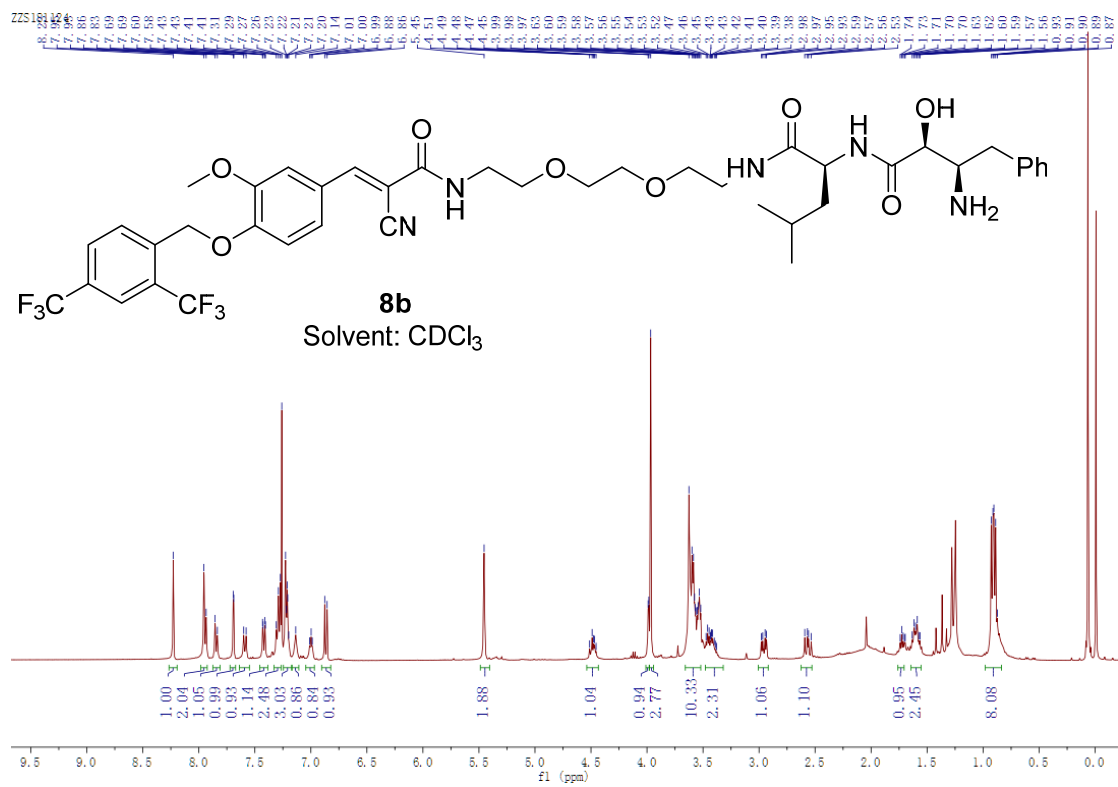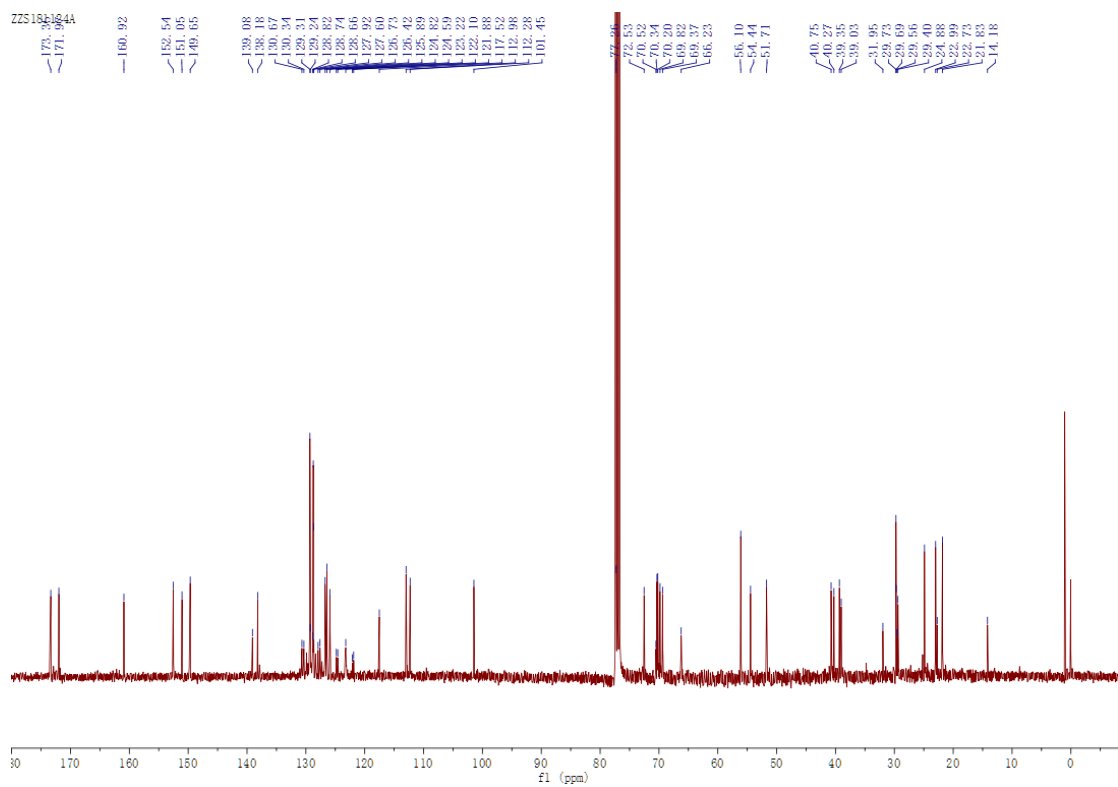



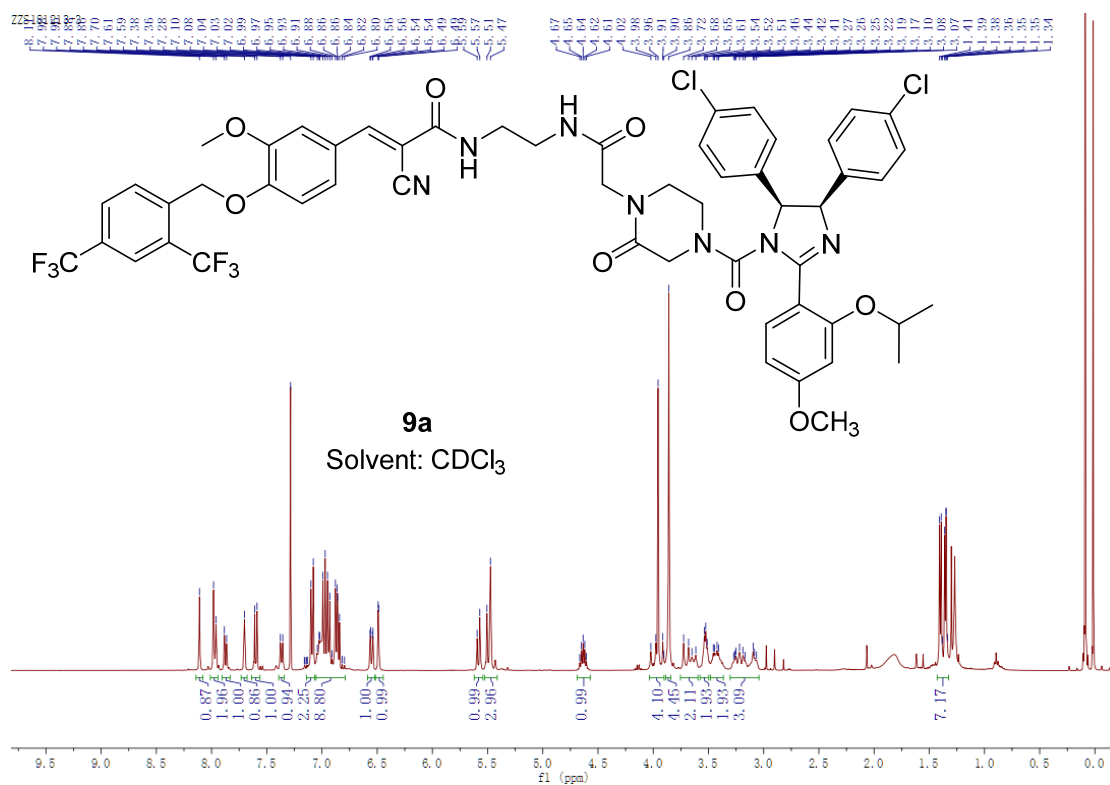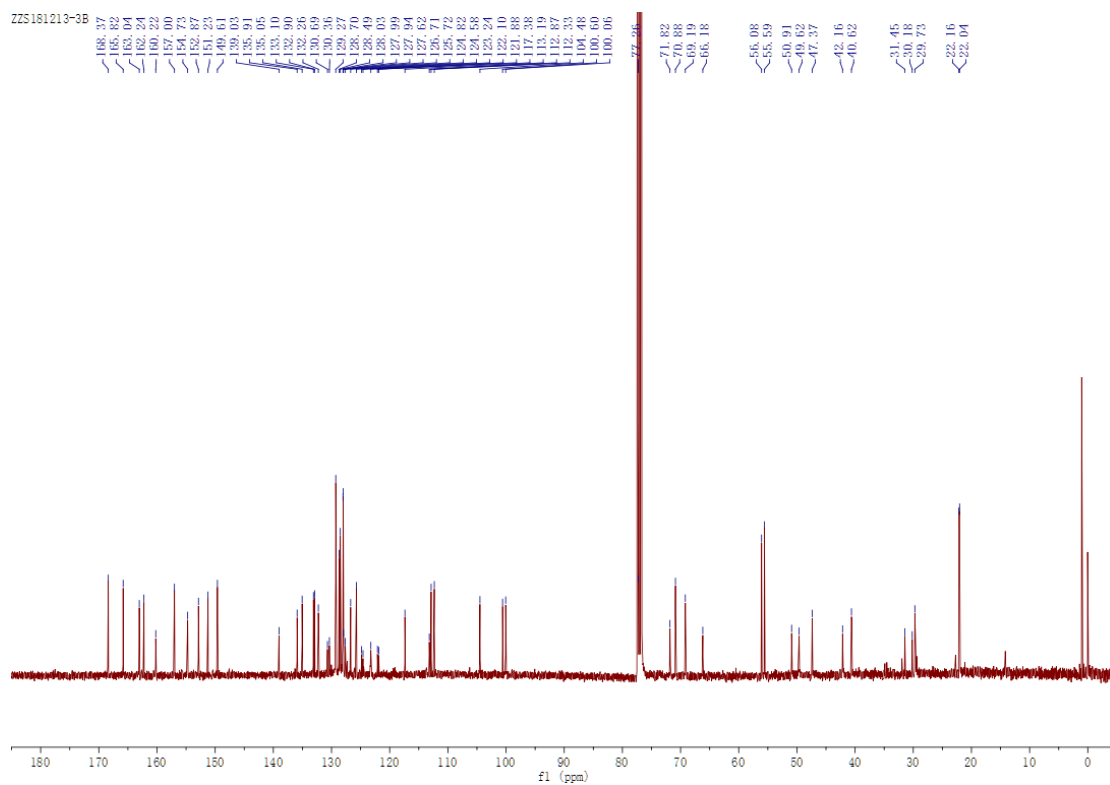



## 7. HPLC Purity Analysis

Acq. Operator : 系统  
 Sample Operator : 系统  
 Acq. Instrument : 1260LC Location : 1  
 Injection Date : 19/03/2018 20:51:01 Inj Volume : 5.000 µl  
 Acq. Method : E:\DK\TL\方法90C-10A-30min-1u.M  
 Last changed : 04/07/2017 19:18:29 by 系统  
 Analysis Method : E:\DK\ZHANGXIN\METHOD\80C-20A-30min-10uL.M  
 Last changed : 08/02/2018 16:13:05 by 系统

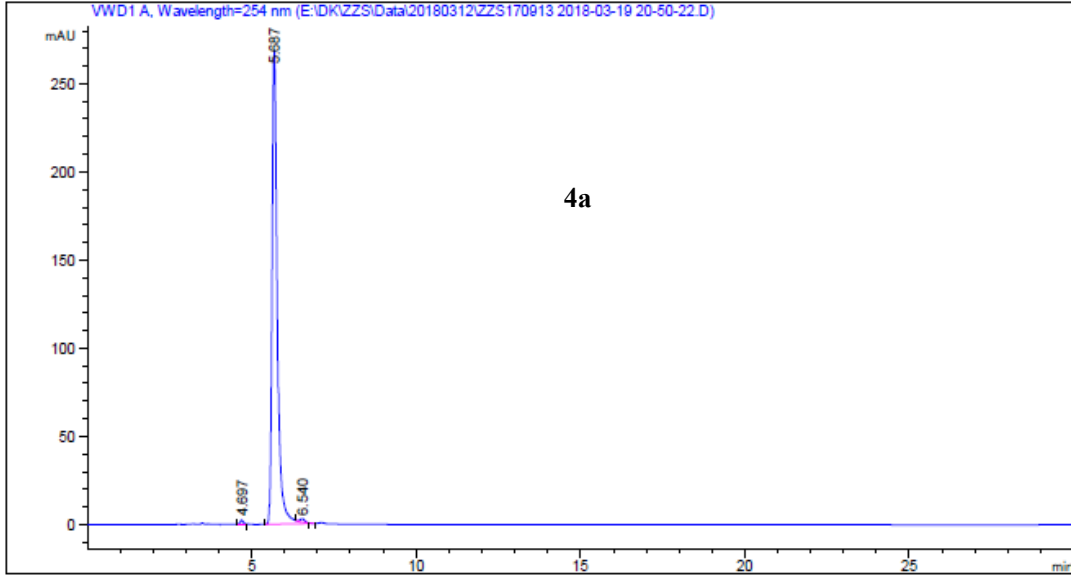

=====  
 Area Percent Report  
 =====

Sorted By : Signal  
 Multiplier : 1.0000  
 Dilution : 1.0000  
 Sample Amount : 20.00000 [ng/ul] (not used in calc.)  
 Use Multiplier & Dilution Factor with ISTDs

Signal 1: VWD1 A, Wavelength=254 nm

| Peak # | RetTime [min] | Type | Width [min] | Area [mAU*s] | Height [mAU] | Area %  |
|--------|---------------|------|-------------|--------------|--------------|---------|
| 1      | 4.697         | BB   | 0.1081      | 14.75901     | 2.14892      | 0.4868  |
| 2      | 5.687         | BV R | 0.1663      | 2999.98804   | 268.59540    | 98.9425 |
| 3      | 6.540         | VB E | 0.1392      | 17.30550     | 1.91996      | 0.5708  |

Totals : 3032.05255 272.66428

Acq. Operator : 系统  
 Sample Operator : 系统  
 Acq. Instrument : 1260LC Location : 1  
 Injection Date : 29/07/2018 18:25:41  
 Inj Volume : 5.000 µl  
 Method : E:\DK\TL\方法\80C-20A-30min-1u.M  
 Last changed : 26/10/2017 17:22:09 by 系统

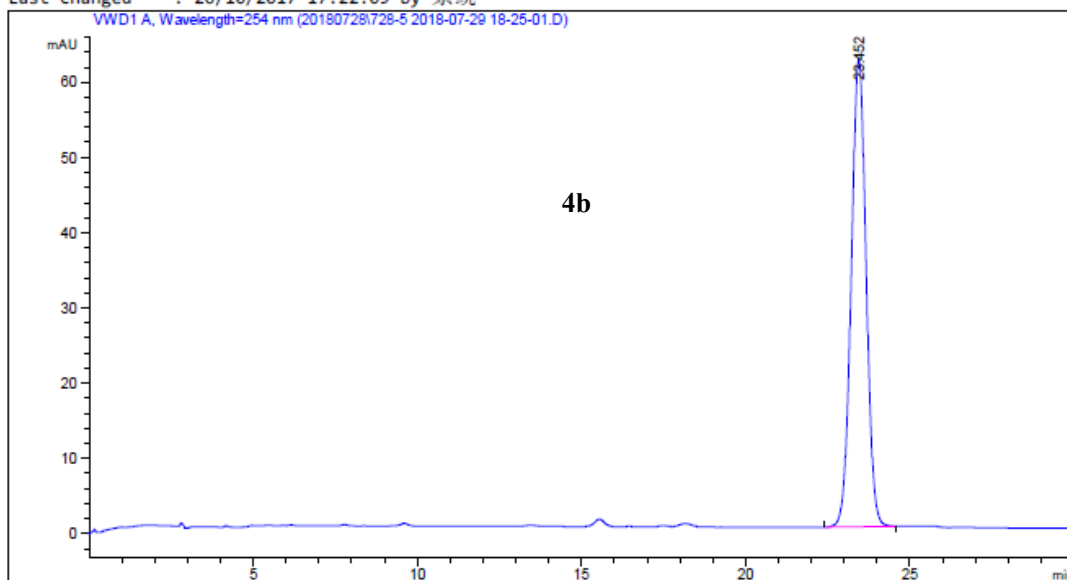

=====  
 Area Percent Report  
 =====

Sorted By : Signal  
 Multiplier : 2.0000  
 Dilution : 1.0000  
 Sample Amount: : 10.00000 [ng/ul] (not used in calc.)  
 Use Multiplier & Dilution Factor with ISTDs

Signal 1: VWD1 A, Wavelength=254 nm

| Peak # | RetTime [min] | Type | Width [min] | Area [mAU*s] | Height [mAU] | Area %   |
|--------|---------------|------|-------------|--------------|--------------|----------|
| 1      | 23.452        | BB   | 0.4904      | 1959.64551   | 62.05481     | 100.0000 |

Totals :                    1959.64551    62.05481



Acq. Operator : 系统  
 Sample Operator : 系统  
 Acq. Instrument : 1260LC Location : 1  
 Injection Date : 29/07/2018 15:57:34 Inj Volume : 5.000 µl  
 Acq. Method : E:\DK\TL\方法\80C-20A-30min-1u.M  
 Last changed : 26/10/2017 17:22:09 by 系统  
 Analysis Method : E:\DK\ZHANGXIN\METHOD\100C-60min-5uL.M  
 Last changed : 16/04/2018 09:54:06 by 系统

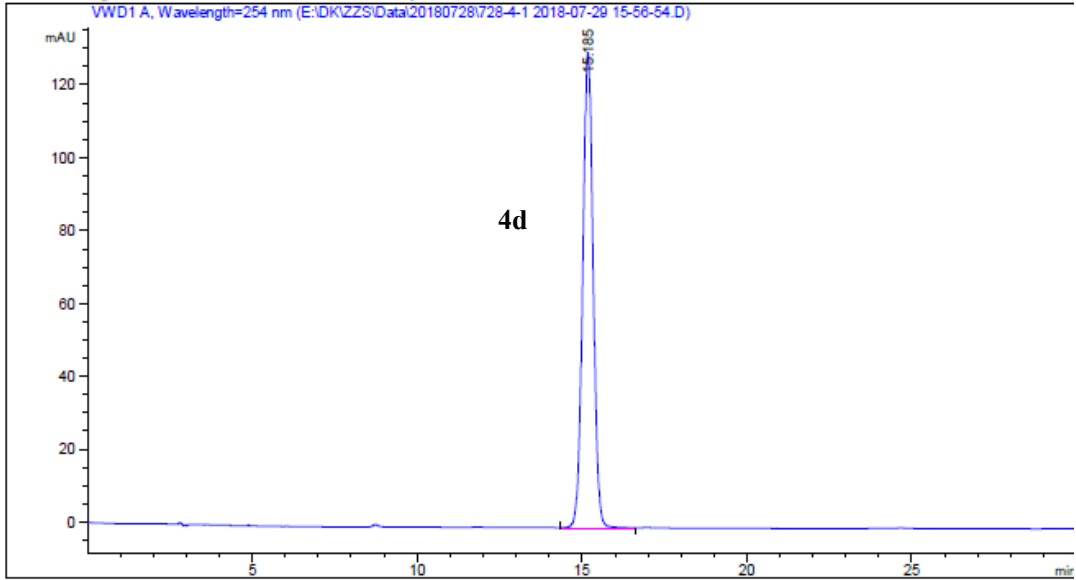

=====  
 Area Percent Report  
 =====

Sorted By : Signal  
 Multiplier : 2.0000  
 Dilution : 1.0000  
 Sample Amount: : 10.00000 [ng/ul] (not used in calc.)  
 Use Multiplier & Dilution Factor with ISTDs

Signal 1: VWD1 A, Wavelength=254 nm

| Peak # | RetTime [min] | Type | Width [min] | Area [mAU*s] | Height [mAU] | Area %   |
|--------|---------------|------|-------------|--------------|--------------|----------|
| 1      | 15.185        | BB   | 0.3407      | 2871.36914   | 130.50970    | 100.0000 |

Totals :                    2871.36914   130.50970

Acq. Operator : 系统  
 Sample Operator : 系统  
 Acq. Instrument : 1260LC Location : 2  
 Injection Date : 11/07/2018 16:12:32 Inj Volume : 5.000 µl  
 Acq. Method : E:\DK\TL\方法\85C-15A-30min-1u.M  
 Last changed : 09/12/2017 11:38:08 by 系统  
 Analysis Method : E:\DK\ZHANGXIN\METHOD\100C-60min-5uL.M  
 Last changed : 16/04/2018 09:54:06 by 系统

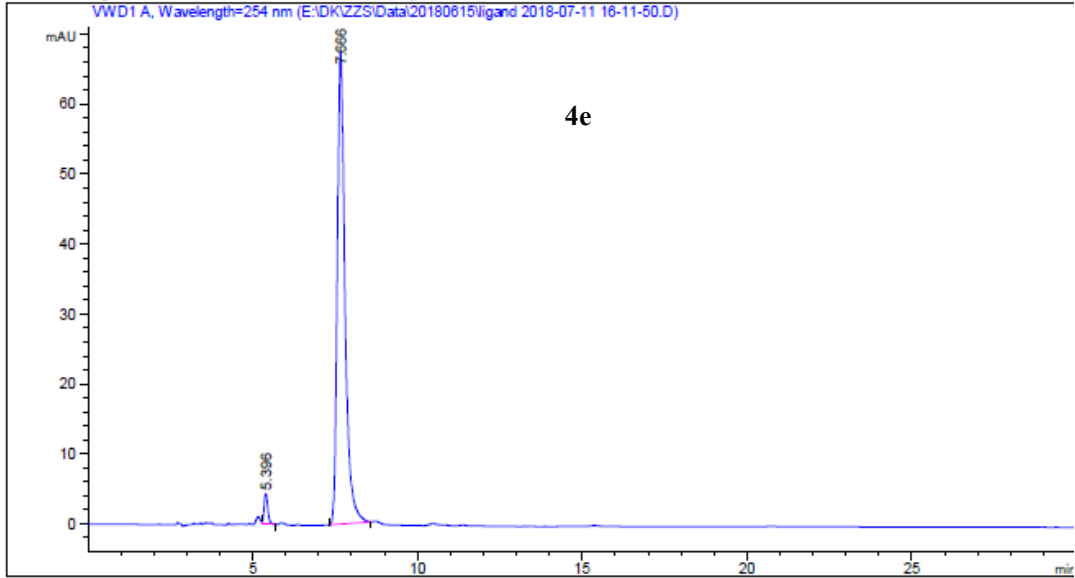

=====  
 Area Percent Report  
 =====

Sorted By : Signal  
 Multiplier : 2.0000  
 Dilution : 1.0000  
 Sample Amount: : 10.00000 [ng/ul] (not used in calc.)  
 Use Multiplier & Dilution Factor with ISTDs

Signal 1: VWD1 A, Wavelength=254 nm

| Peak # | RetTime [min] | Type | Width [min] | Area [mAU*s] | Height [mAU] | Area %  |
|--------|---------------|------|-------------|--------------|--------------|---------|
| 1      | 5.396         | VB   | 0.1240      | 35.84205     | 4.40191      | 3.1504  |
| 2      | 7.666         | BB   | 0.2443      | 1101.84070   | 67.53761     | 96.8496 |

Totals : 1137.68275 71.93952

Acq. Operator : 系统  
 Sample Operator : 系统  
 Acq. Instrument : 1260LC Location : 1  
 Injection Date : 29/07/2018 19:07:33 Inj Volume : 5.000 µl  
 Method : E:\DK\TL\方法\80C-20A-30min-1u.M  
 Last changed : 26/10/2017 17:22:09 by 系统

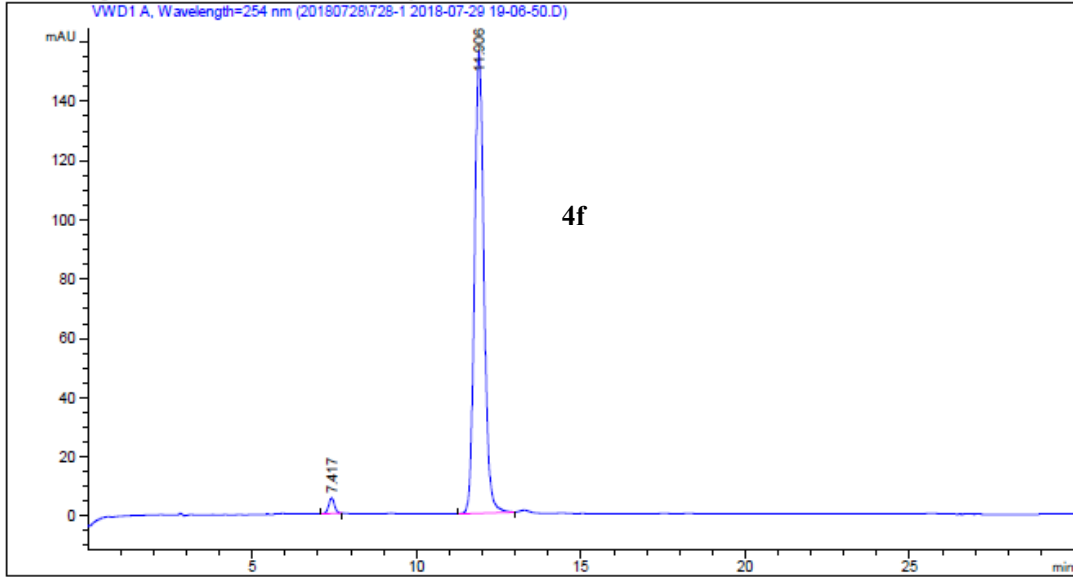

=====  
 Area Percent Report  
 =====

Sorted By : Signal  
 Multiplier : 2.0000  
 Dilution : 1.0000  
 Sample Amount: : 10.00000 [ng/ul] (not used in calc.)  
 Use Multiplier & Dilution Factor with ISTDs

Signal 1: VWD1 A, Wavelength=254 nm

| Peak # | RetTime [min] | Type | Width [min] | Area [mAU*s] | Height [mAU] | Area %  |
|--------|---------------|------|-------------|--------------|--------------|---------|
| 1      | 7.417         | BB   | 0.1917      | 64.96856     | 5.27423      | 2.0405  |
| 2      | 11.906        | BB   | 0.3076      | 3119.06226   | 155.77315    | 97.9595 |

Totals : 3184.03082 161.04737



Acq. Operator : 系统  
 Sample Operator : 系统  
 Acq. Instrument : 1260LC Location : 2  
 Injection Date : 16/12/2017 17:12:35 Inj Volume : 5.000 µl  
 Acq. Method : E:\DK\IL\方法85C-15A-30min-1u.M  
 Last changed : 16/12/2017 16:37:44 by 系统  
 (modified after loading)  
 Analysis Method : E:\DK\IL\方法80C-20D-30min-1u.M  
 Last changed : 04/07/2017 21:08:28 by 系统

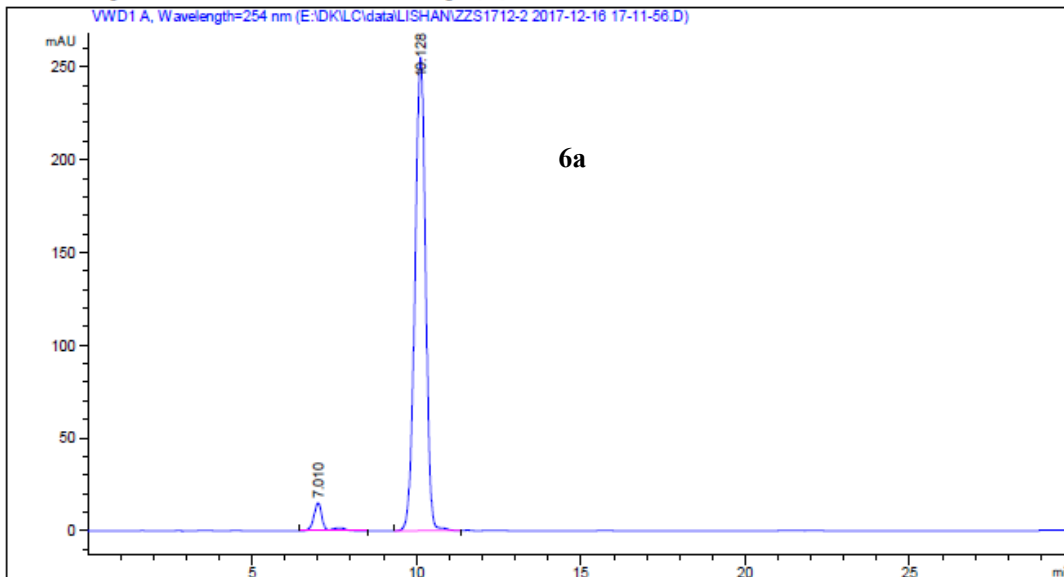

=====  
 Area Percent Report  
 =====

Sorted By : Signal  
 Multiplier : 1.0000  
 Dilution : 1.0000  
 Sample Amount: : 20.00000 [ng/ul] (not used in calc.)  
 Use Multiplier & Dilution Factor with ISTDs

Signal 1: VWD1 A, Wavelength=254 nm

| Peak # | RetTime [min] | Type | Width [min] | Area [mAU*s] | Height [mAU] | Area %  |
|--------|---------------|------|-------------|--------------|--------------|---------|
| 1      | 7.010         | BV R | 0.2868      | 291.56857    | 15.06461     | 4.8314  |
| 2      | 10.128        | BB   | 0.3495      | 5743.27344   | 255.25952    | 95.1686 |

Totals : 6034.84201 270.32413

Acq. Operator : 系统  
 Sample Operator : 系统  
 Acq. Instrument : 1260LC Location : 1  
 Injection Date : 16/12/2017 16:38:38 Inj Volume : 5.000 µl  
 Acq. Method : E:\DK\TL\方法85C-15A-30min-lu.M  
 Last changed : 16/12/2017 16:37:44 by 系统  
 (modified after loading)  
 Analysis Method : E:\DK\TL\方法80C-20D-30min-lu.M  
 Last changed : 04/07/2017 21:08:28 by 系统

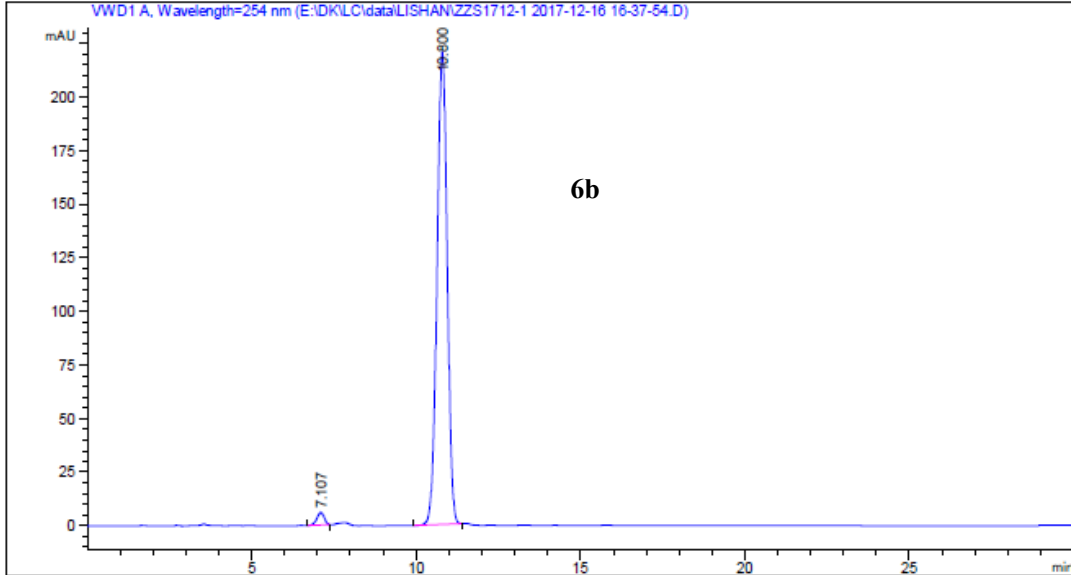

=====  
 Area Percent Report  
 =====

Sorted By : Signal  
 Multiplier : 1.0000  
 Dilution : 1.0000  
 Sample Amount : 20.00000 [ng/ul] (not used in calc.)  
 Use Multiplier & Dilution Factor with ISTDs

Signal 1: VWD1 A, Wavelength=254 nm

| Peak # | RetTime [min] | Type | Width [min] | Area [mAU*s] | Height [mAU] | Area %  |
|--------|---------------|------|-------------|--------------|--------------|---------|
| 1      | 7.107         | BB   | 0.2432      | 90.29964     | 5.78235      | 1.8698  |
| 2      | 10.800        | BB   | 0.3346      | 4739.15674   | 220.60747    | 98.1302 |

Totals : 4829.45638 226.38982

Acq. Operator : 系统  
 Sample Operator : 系统  
 Acq. Instrument : 1260LC Location : 1  
 Injection Date : 02/07/2018 15:14:23 Inj Volume : 5.000 µl  
 Acq. Method : E:\DK\TL\方法\85C-15A-30min-1u.M  
 Last changed : 09/12/2017 11:38:08 by 系统  
 Analysis Method : E:\DK\TL\方法\85C-15D-30min-1u.M  
 Last changed : 04/07/2017 21:09:03 by 系统

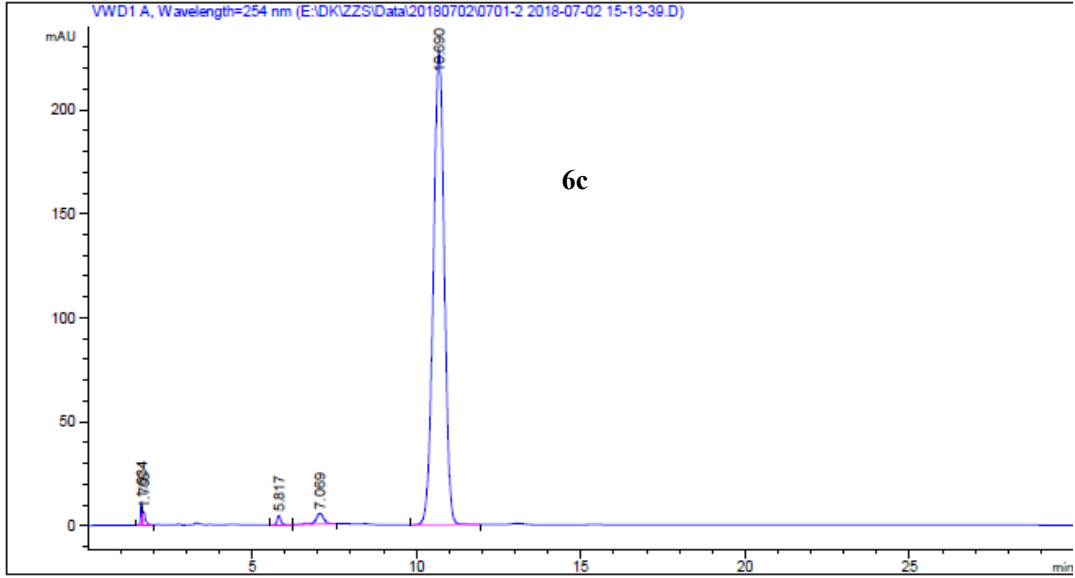

=====  
 Area Percent Report  
 =====

Sorted By : Signal  
 Multiplier : 2.0000  
 Dilution : 1.0000  
 Sample Amount: : 10.00000 [ng/ul] (not used in calc.)  
 Use Multiplier & Dilution Factor with ISTDs

Signal 1: VWD1 A, Wavelength=254 nm

| Peak # | RetTime [min] | Type | Width [min] | Area [mAU*s] | Height [mAU] | Area %  |
|--------|---------------|------|-------------|--------------|--------------|---------|
| 1      | 1.634         | BV   | 0.0565      | 42.81990     | 11.22754     | 0.7857  |
| 2      | 1.705         | VB   | 0.0735      | 32.30190     | 6.33572      | 0.5927  |
| 3      | 5.817         | BB   | 0.1177      | 33.12532     | 4.30737      | 0.6078  |
| 4      | 7.069         | VB R | 0.2545      | 87.76083     | 5.18298      | 1.6103  |
| 5      | 10.690        | BB   | 0.3584      | 5253.95557   | 227.56870    | 96.4035 |

Totals : 5449.96352 254.62230

Acq. Operator : 系统  
 Sample Operator : 系统  
 Acq. Instrument : 1260LC Location : 1  
 Injection Date : 30/12/2017 14:28:28 Inj Volume : 5.000 µl  
 Acq. Method : E:\DK\TL\方法\85C-15A-30min-1u.M  
 Last changed : 09/12/2017 11:38:08 by 系统  
 Analysis Method : C:\Chem32\1\Methods\DEF\_LC.M  
 Last changed : 23/06/2014 04:13:01 by SYSTEM

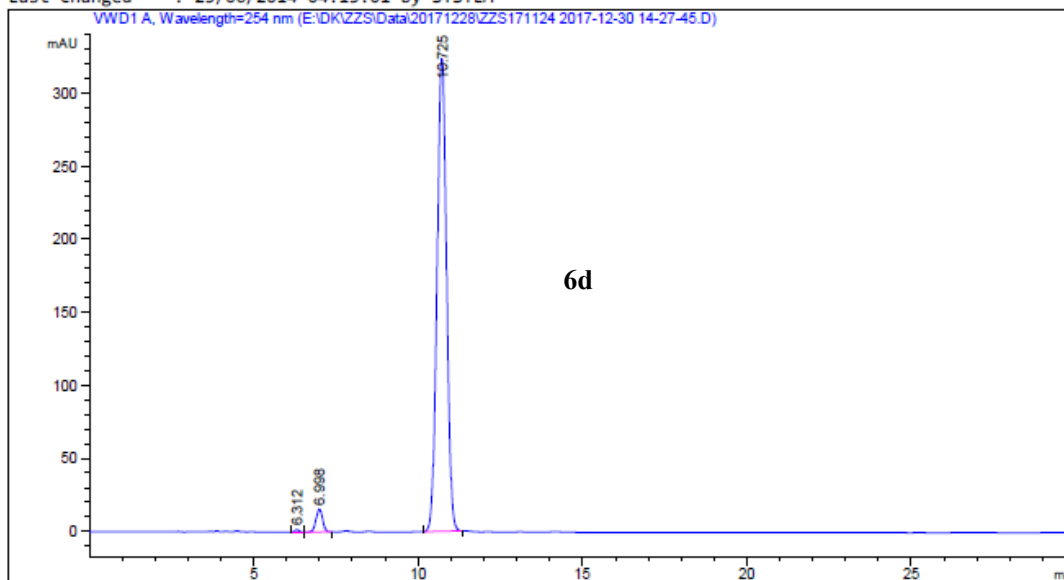

=====  
 Area Percent Report  
 =====

Sorted By : Signal  
 Multiplier : 1.0000  
 Dilution : 1.0000  
 Sample Amount: : 20.00000 [ng/ul] (not used in calc.)  
 Use Multiplier & Dilution Factor with ISTDs

Signal 1: VWD1 A, Wavelength=254 nm

| Peak # | RetTime [min] | Type | Width [min] | Area [mAU*s] | Height [mAU] | Area %  |
|--------|---------------|------|-------------|--------------|--------------|---------|
| 1      | 6.312         | BB   | 0.1175      | 13.81890     | 1.82117      | 0.2051  |
| 2      | 6.998         | BB   | 0.2183      | 219.65315    | 15.69065     | 3.2606  |
| 3      | 10.725        | BB   | 0.3122      | 6503.16846   | 323.95517    | 96.5343 |

Totals :                    6736.64051  341.46699

Acq. Operator : 系统  
 Sample Operator : 系统  
 Acq. Instrument : 1260LC Location : 1  
 Injection Date : 23/06/2018 20:57:08 Inj Volume : 5.000 µl  
 Acq. Method : E:\DK\TL\方法\85C-15A-30min-1u.M  
 Last changed : 09/12/2017 11:38:08 by 系统  
 Analysis Method : E:\DK\ZHANGXIN\METHOD\90C-100-30min-10uL.M  
 Last changed : 26/12/2017 14:41:47 by 系统

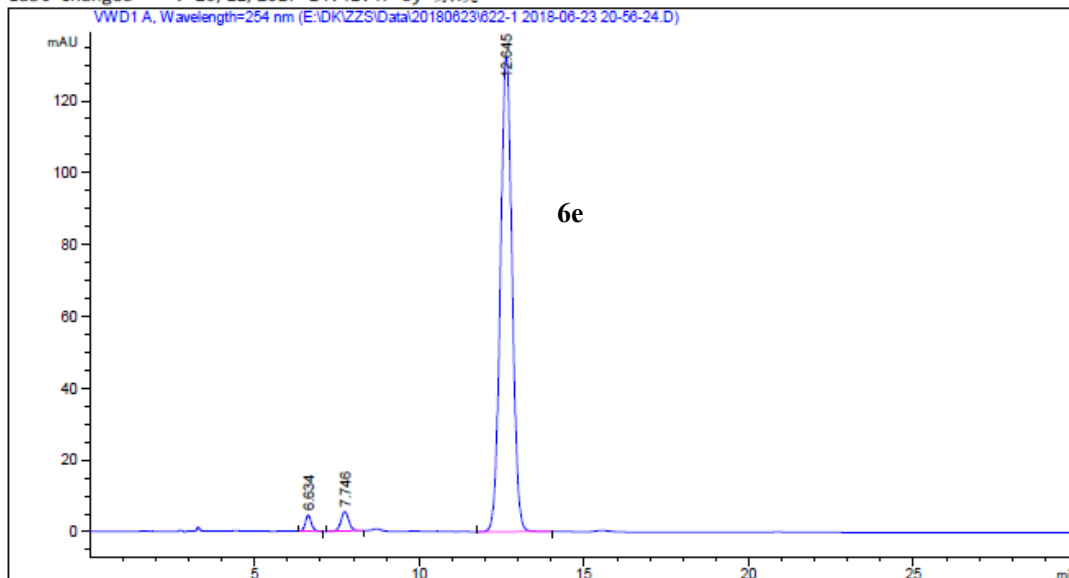

=====  
 Area Percent Report  
 =====

Sorted By : Signal  
 Multiplier : 2.0000  
 Dilution : 1.0000  
 Sample Amount: : 10.00000 [ng/ul] (not used in calc.)  
 Use Multiplier & Dilution Factor with ISTDs

Signal 1: VWD1 A, Wavelength=254 nm

| Peak # | RetTime [min] | Type | Width [min] | Area [mAU*s] | Height [mAU] | Area %  |
|--------|---------------|------|-------------|--------------|--------------|---------|
| 1      | 6.634         | BB   | 0.1931      | 55.10929     | 4.40067      | 1.6181  |
| 2      | 7.746         | BB   | 0.2527      | 87.93238     | 5.38062      | 2.5819  |
| 3      | 12.645        | BB   | 0.3829      | 3262.68750   | 132.23456    | 95.8000 |

Totals : 3405.72917 142.01585

Acq. Operator : 系统  
 Sample Operator : 系统  
 Acq. Instrument : 1260LC Location : 1  
 Injection Date : 18/09/2018 19:23:55 Inj Volume : 50.000 µl  
 Acq. Method : E:\DK\TL\方法\85C-15A-30min-1u.M  
 Last changed : 18/09/2018 19:22:59 by 系统  
 (modified after loading)  
 Analysis Method : E:\DK\ZHANGXIN\METHOD\100C-60min-5uL.M  
 Last changed : 16/04/2018 09:54:06 by 系统

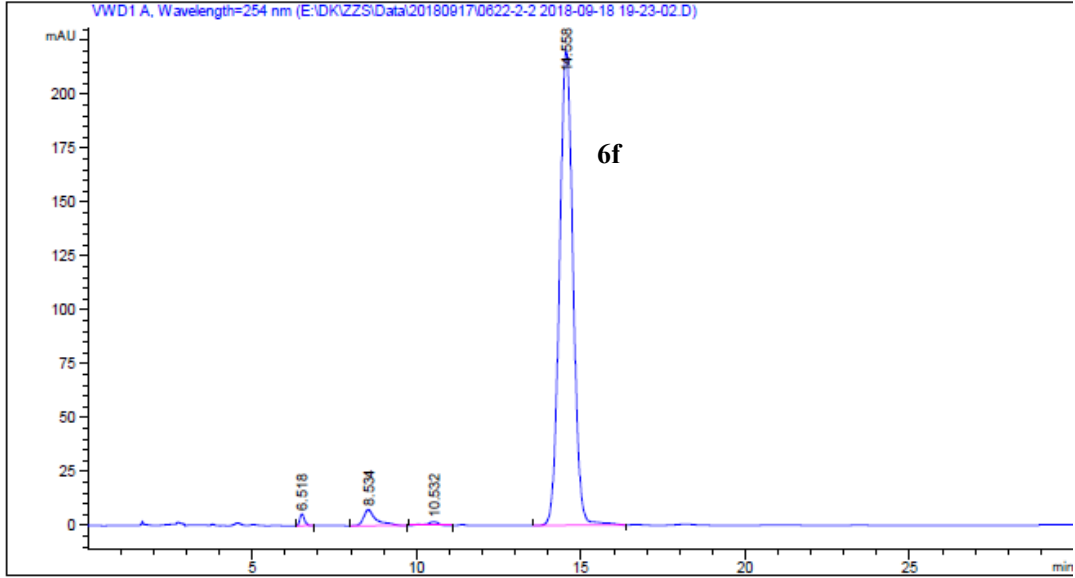

=====  
 Area Percent Report  
 =====

Sorted By : Signal  
 Multiplier : 2.0000  
 Dilution : 1.0000  
 Sample Amount: : 10.00000 [ng/ul] (not used in calc.)  
 Use Multiplier & Dilution Factor with ISTDs

Signal 1: VWD1 A, Wavelength=254 nm

| Peak # | RetTime [min] | Type | Width [min] | Area [mAU*s] | Height [mAU] | Area %  |
|--------|---------------|------|-------------|--------------|--------------|---------|
| 1      | 6.518         | BB   | 0.1516      | 52.30556     | 5.32589      | 0.7942  |
| 2      | 8.534         | BB   | 0.3748      | 192.24989    | 7.35789      | 2.9192  |
| 3      | 10.532        | BB   | 0.3736      | 44.99976     | 1.71258      | 0.6833  |
| 4      | 14.558        | BB   | 0.4452      | 6296.18457   | 219.80826    | 95.6033 |

Totals : 6585.73978 234.20462

Acq. Operator : 系统  
 Sample Operator : 系统  
 Acq. Instrument : 1260LC Location : 1  
 Injection Date : 05/06/2018 21:32:32 Inj Volume : 5.000 µl  
 Acq. Method : E:\DK\TL\方法\85C-15A-30min-1u.M  
 Last changed : 09/12/2017 11:38:08 by 系统  
 Analysis Method : E:\DK\TL\方法\90C-10A-30min-1u.M  
 Last changed : 28/07/2018 18:29:28 by 系统  
 (modified after loading)

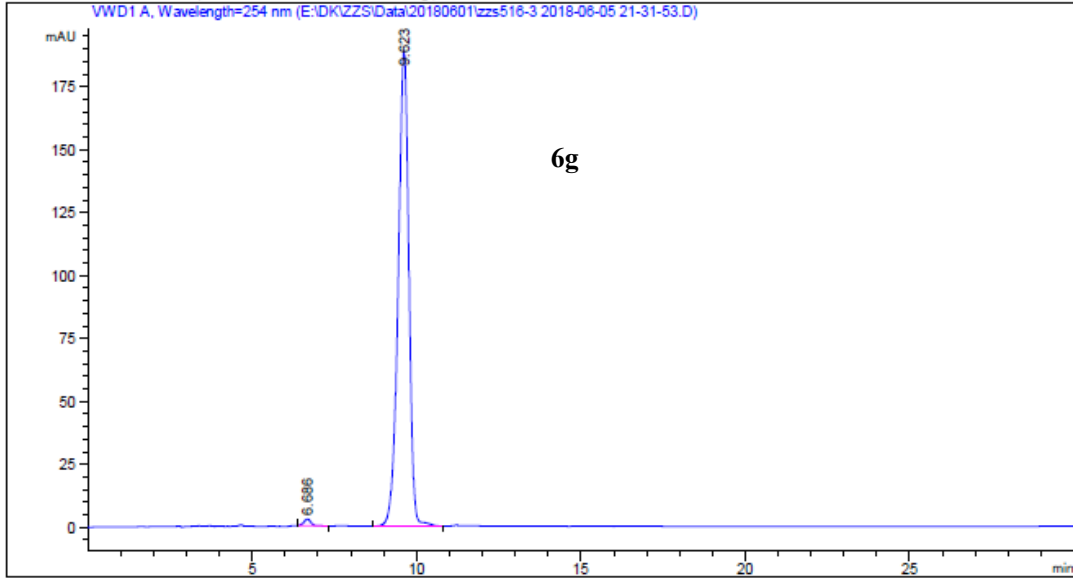

=====  
 Area Percent Report  
 =====

Sorted By : Signal  
 Multiplier : 2.0000  
 Dilution : 1.0000  
 Sample Amount : 5.00000 [ng/ul] (not used in calc.)  
 Use Multiplier & Dilution Factor with ISTDs

Signal 1: VWD1 A, Wavelength=254 nm

| Peak # | RetTime [min] | Type | Width [min] | Area [mAU*s] | Height [mAU] | Area %  |
|--------|---------------|------|-------------|--------------|--------------|---------|
| 1      | 6.686         | BB   | 0.2267      | 38.90159     | 2.62779      | 0.9077  |
| 2      | 9.623         | BB   | 0.3455      | 4246.87061   | 188.03697    | 99.0923 |

Totals : 4285.77220 190.66476

Acq. Operator : 系统  
 Sample Operator : 系统  
 Acq. Instrument : 1260LC  
 Injection Date : 16/12/2017 13:23:00  
 Location : 1  
 Inj Volume : 5.000 µl  
 Acq. Method : E:\DK\TL\方法85C-15A-30min-lu.M  
 Last changed : 09/12/2017 11:38:08 by 系统  
 Analysis Method : E:\DK\TL\方法80C-20D-30min-lu.M  
 Last changed : 04/07/2017 21:08:28 by 系统

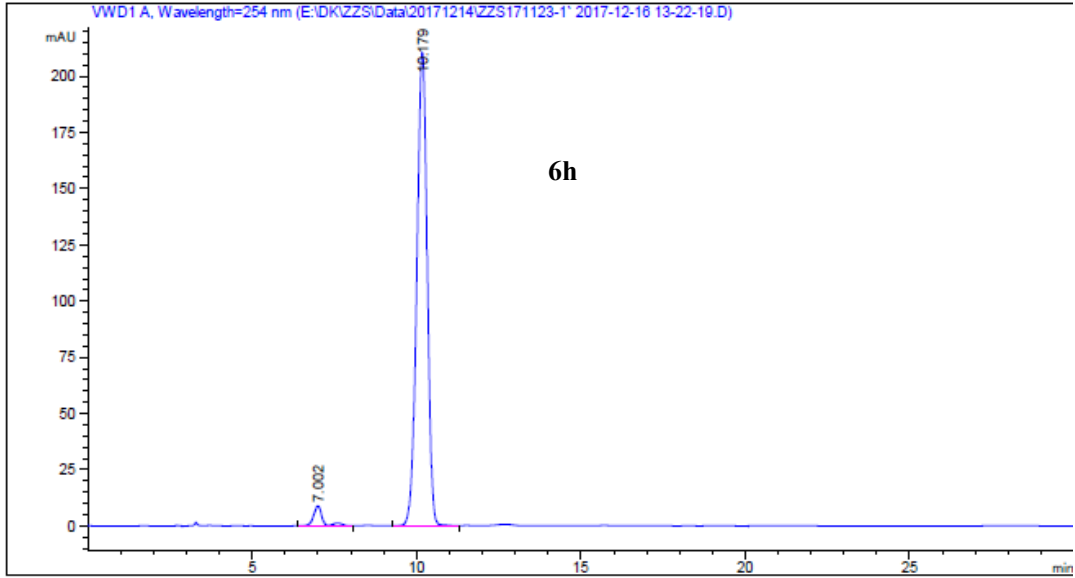

=====  
 Area Percent Report  
 =====

Sorted By : Signal  
 Multiplier : 1.0000  
 Dilution : 1.0000  
 Sample Amount : 5.00000 [ng/ul] (not used in calc.)  
 Use Multiplier & Dilution Factor with ISTDs

Signal 1: WWD1 A, Wavelength=254 nm

| Peak # | RetTime [min] | Type | Width [min] | Area [mAU*s] | Height [mAU] | Area %  |
|--------|---------------|------|-------------|--------------|--------------|---------|
| 1      | 7.002         | BV R | 0.2873      | 174.79730    | 8.97302      | 3.6404  |
| 2      | 10.179        | BB   | 0.3402      | 4626.79053   | 210.65396    | 96.3596 |

Totals : 4801.58783 219.62699



Acq. Operator : 系统  
 Sample Operator : 系统  
 Acq. Instrument : 1260LC Location : 1  
 Injection Date : 16/12/2017 12:51:20 Inj Volume : 5.000 µl  
 Acq. Method : E:\DK\TL\方法85C-15A-30min-lu.M  
 Last changed : 09/12/2017 11:38:08 by 系统  
 Analysis Method : E:\DK\TL\方法80C-20D-30min-lu.M  
 Last changed : 04/07/2017 21:08:28 by 系统

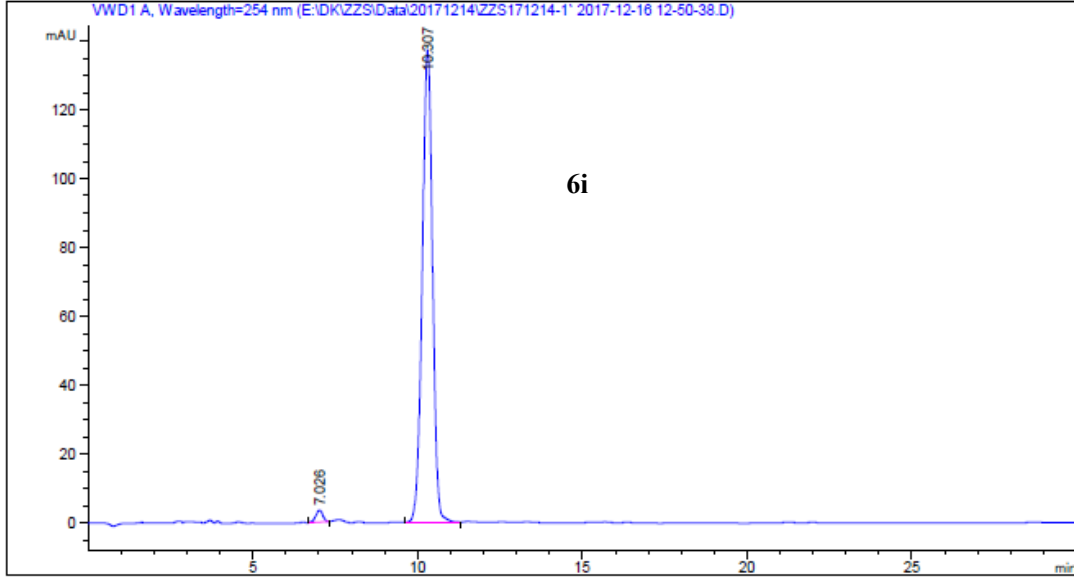

=====  
 Area Percent Report  
 =====

Sorted By : Signal  
 Multiplier : 1.0000  
 Dilution : 1.0000  
 Sample Amount : 5.00000 [ng/ul] (not used in calc.)  
 Use Multiplier & Dilution Factor with ISTDs

Signal 1: VWD1 A, Wavelength=254 nm

| Peak # | RetTime [min] | Type | Width [min] | Area [mAU*s] | Height [mAU] | Area %  |
|--------|---------------|------|-------------|--------------|--------------|---------|
| 1      | 7.026         | BB   | 0.2293      | 50.70133     | 3.43298      | 1.6766  |
| 2      | 10.307        | BB   | 0.3361      | 2973.29468   | 137.07841    | 98.3234 |

Totals : 3023.99601 140.51139

Acq. Operator : 系统  
 Sample Operator : 系统  
 Acq. Instrument : 1260LC Location : 1  
 Injection Date : 18/09/2018 18:06:12 Inj Volume : 5.000 µl  
 Acq. Method : E:\DK\TL\方法\85C-15A-30min-1u.M  
 Last changed : 09/12/2017 11:38:08 by 系统  
 Analysis Method : E:\DK\ZHANGXIN\METHOD\100C-60min-5uL.M  
 Last changed : 16/04/2018 09:54:06 by 系统

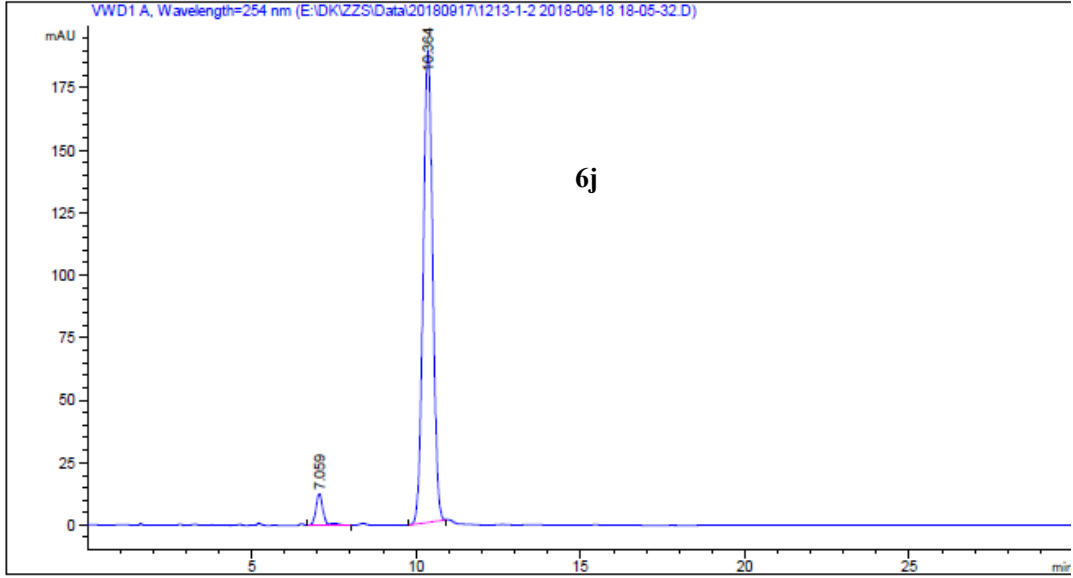

=====  
 Area Percent Report  
 =====

Sorted By : Signal  
 Multiplier : 2.0000  
 Dilution : 1.0000  
 Sample Amount: : 10.00000 [ng/ul] (not used in calc.)  
 Use Multiplier & Dilution Factor with ISTDs

Signal 1: VWD1 A, Wavelength=254 nm

| Peak # | RetTime [min] | Type | Width [min] | Area [mAU*s] | Height [mAU] | Area %  |
|--------|---------------|------|-------------|--------------|--------------|---------|
| 1      | 7.059         | BV R | 0.2372      | 195.99672    | 12.54745     | 4.9228  |
| 2      | 10.364        | BB   | 0.3120      | 3785.39819   | 188.75014    | 95.0772 |

Totals : 3981.39491 201.29758

Acq. Operator : 系统  
 Sample Operator : 系统  
 Acq. Instrument : 1260LC Location : 1  
 Injection Date : 16/12/2017 12:51:20 Inj Volume : 5.000 µl  
 Acq. Method : E:\DK\TL\方法85C-15A-30min-lu.M  
 Last changed : 09/12/2017 11:38:08 by 系统  
 Analysis Method : E:\DK\TL\方法80C-20D-30min-lu.M  
 Last changed : 04/07/2017 21:08:28 by 系统

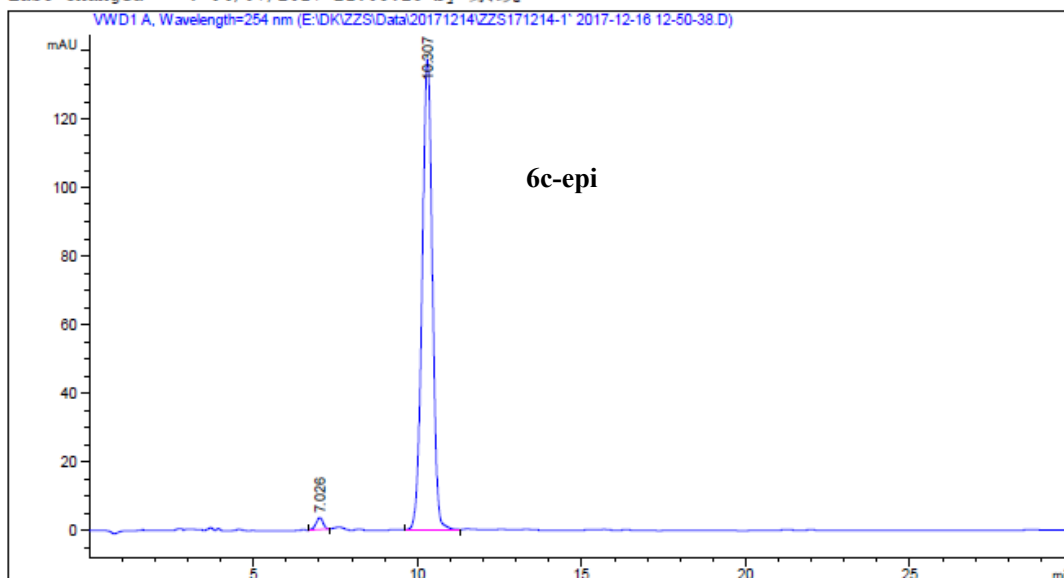

=====  
 Area Percent Report  
 =====

Sorted By : Signal  
 Multiplier : 1.0000  
 Dilution : 1.0000  
 Sample Amount : 5.00000 [ng/ul] (not used in calc.)  
 Use Multiplier & Dilution Factor with ISTDs

Signal 1: VWD1 A, Wavelength=254 nm

| Peak # | RetTime [min] | Type | Width [min] | Area [mAU*s] | Height [mAU] | Area %  |
|--------|---------------|------|-------------|--------------|--------------|---------|
| 1      | 7.026         | BB   | 0.2293      | 50.70133     | 3.43298      | 1.6766  |
| 2      | 10.307        | BB   | 0.3361      | 2973.29468   | 137.07841    | 98.3234 |

Totals : 3023.99601 140.51139

Acq. Operator : 系统  
 Sample Operator : 系统  
 Acq. Instrument : 1260LC Location : 1  
 Injection Date : 06/01/2019 14:32:42 Inj Volume : 5.000 µl  
 Acq. Method : E:\DK\TL\方法\85C-15A-30min-1u.M  
 Last changed : 06/01/2019 14:31:40 by 系统  
 (modified after loading)  
 Analysis Method : E:\DK\SJY\METHOD\shuijiada.M  
 Last changed : 05/01/2019 11:20:17 by 系统

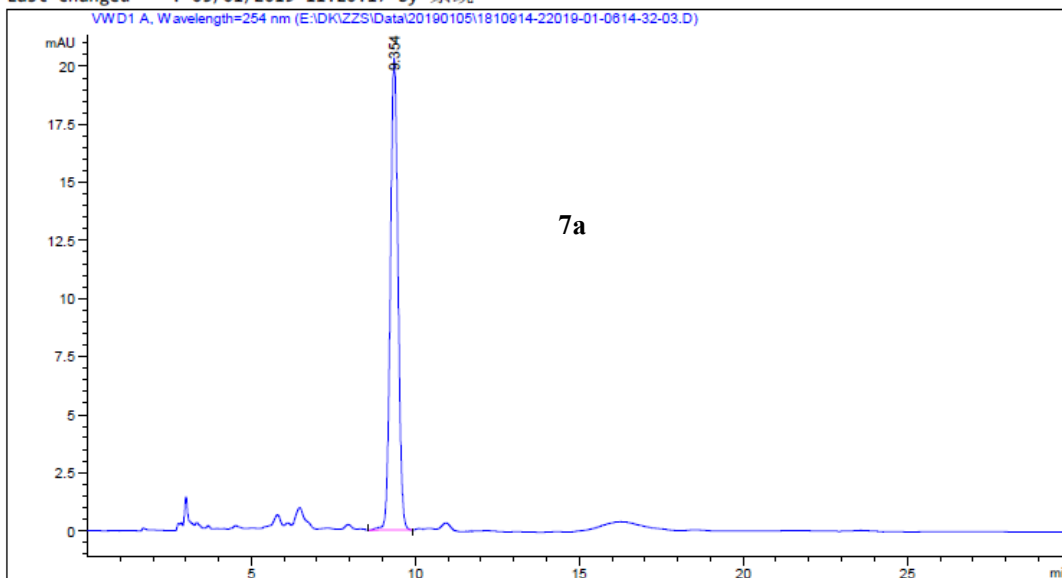

=====  
 Area Percent Report  
 =====

Sorted By : Signal  
 Multiplier : 2.0000  
 Dilution : 1.0000  
 Sample Amount: : 30.00000 [ng/ul] (not used in calc.)  
 Use Multiplier & Dilution Factor with ISTDs

Signal 1: VWD1 A, Wavelength=254 nm

| Peak # | RetTime [min] | Type | Width [min] | Area [mAU*s] | Height [mAU] | Area %   |
|--------|---------------|------|-------------|--------------|--------------|----------|
| 1      | 9.354         | BB   | 0.2526      | 329.94098    | 20.29972     | 100.0000 |

Totals : 329.94098 20.29972

Acq. Operator : 系统  
 Sample Operator : 系统  
 Acq. Instrument : 1260LC Location : 1  
 Injection Date : 27/09/2018 14:52:31 Inj Volume : 5.000 µl  
 Acq. Method : E:\DK\TL\方法\85C-15A-30min-1u.M  
 Last changed : 09/12/2017 11:38:08 by 系统  
 Analysis Method : E:\DK\SJY\METHOD\XSXZ.M  
 Last changed : 21/12/2018 18:12:24 by 系统

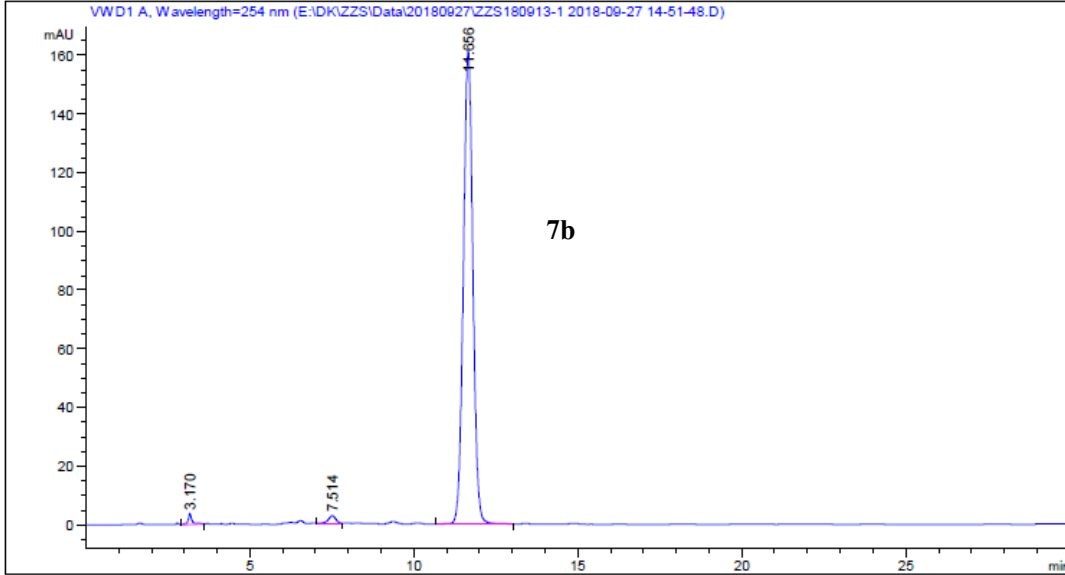

=====  
 Area Percent Report  
 =====

Sorted By : Signal  
 Multiplier : 2.0000  
 Dilution : 1.0000  
 Sample Amount: : 10.00000 [ng/ul] (not used in calc.)  
 Use Multiplier & Dilution Factor with ISTDs

Signal 1: VWD1 A, Wavelength=254 nm

| Peak # | RetTime [min] | Type | Width [min] | Area [mAU*s] | Height [mAU] | Area %  |
|--------|---------------|------|-------------|--------------|--------------|---------|
| 1      | 3.170         | BV R | 0.1210      | 30.50074     | 3.59347      | 0.9150  |
| 2      | 7.514         | BB   | 0.2307      | 38.92440     | 2.55482      | 1.1677  |
| 3      | 11.656        | BB   | 0.3132      | 3263.93237   | 161.24055    | 97.9173 |

Totals : 3333.35751 167.38884

Acq. Operator : 系统  
 Sample Operator : 系统  
 Acq. Instrument : 1260LC Location : 1  
 Injection Date : 11/10/2018 12:39:23 Inj Volume : 10.000 µl  
 Acq. Method : E:\DK\TL\方法\85C-15A-30min-1u.M  
 Last changed : 11/10/2018 12:38:34 by 系统  
 (modified after loading)  
 Analysis Method : E:\DK\SJY\METHOD\XSXZ.M  
 Last changed : 21/12/2018 18:12:24 by 系统

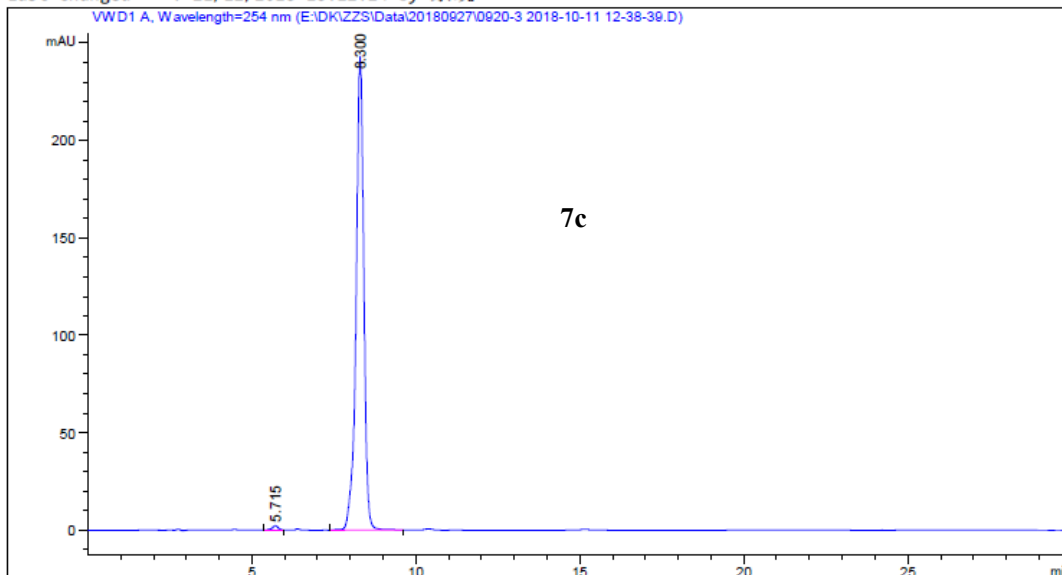

=====  
 Area Percent Report  
 =====

Sorted By : Signal  
 Multiplier : 2.0000  
 Dilution : 1.0000  
 Sample Amount : 20.00000 [ng/ul] (not used in calc.)  
 Use Multiplier & Dilution Factor with ISTDs

Signal 1: VWD1 A, Wavelength=254 nm

| Peak # | RetTime [min] | Type | Width [min] | Area [mAU*s] | Height [mAU] | Area %  |
|--------|---------------|------|-------------|--------------|--------------|---------|
| 1      | 5.715         | BB   | 0.1929      | 26.39357     | 2.10992      | 0.6572  |
| 2      | 8.300         | BB   | 0.2486      | 3989.97437   | 242.92328    | 99.3428 |

Totals : 4016.36794 245.03320

Acq. Operator : 系统  
 Sample Operator : 系统  
 Acq. Instrument : 1260LC Location : 1  
 Injection Date : 06/01/2019 12:12:48 Inj Volume : 3.000 µl  
 Acq. Method : E:\DK\TL\方法\85C-15A-30min-1u.M  
 Last changed : 06/01/2019 12:08:53 by 系统  
 (modified after loading)  
 Analysis Method : E:\DK\SJY\METHOD\shuijiada.M  
 Last changed : 05/01/2019 11:20:17 by 系统

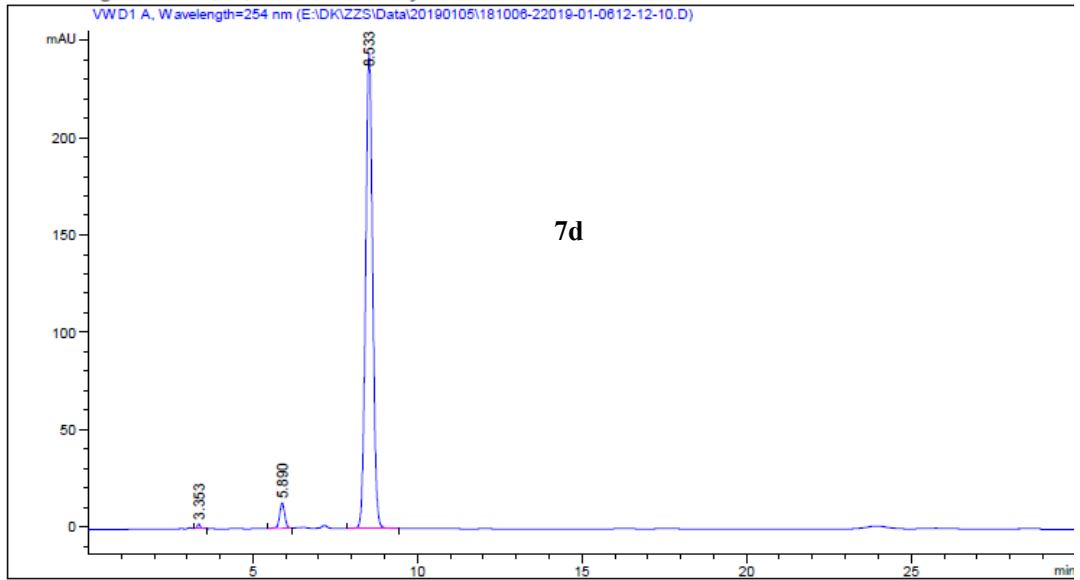

=====  
 Area Percent Report  
 =====

Sorted By : Signal  
 Multiplier : 2.0000  
 Dilution : 1.0000  
 Sample Amount: : 30.00000 [ng/ul] (not used in calc.)  
 Use Multiplier & Dilution Factor with ISTDs

Signal 1: VWD1 A, Wavelength=254 nm

| Peak # | RetTime [min] | Type | Width [min] | Area [mAU*s] | Height [mAU] | Area %  |
|--------|---------------|------|-------------|--------------|--------------|---------|
| 1      | 3.353         | BB   | 0.0974      | 15.67063     | 2.45591      | 0.4104  |
| 2      | 5.890         | BB   | 0.1679      | 141.10254    | 12.97621     | 3.6956  |
| 3      | 8.533         | BB   | 0.2333      | 3661.34229   | 243.70903    | 95.8940 |

Totals : 3818.11546 259.14115

Acq. Operator : 系统  
 Sample Operator : 系统  
 Acq. Instrument : 1260LC Location : 1  
 Injection Date : 31/10/2018 16:20:50 Inj Volume : 20.000 µl  
 Acq. Method : E:\DK\TL\方法\85C-15A-30min-1u.M  
 Last changed : 31/10/2018 16:20:00 by 系统  
 (modified after loading)  
 Analysis Method : E:\DK\SJY\METHOD\XSXZ.M  
 Last changed : 21/12/2018 18:12:24 by 系统

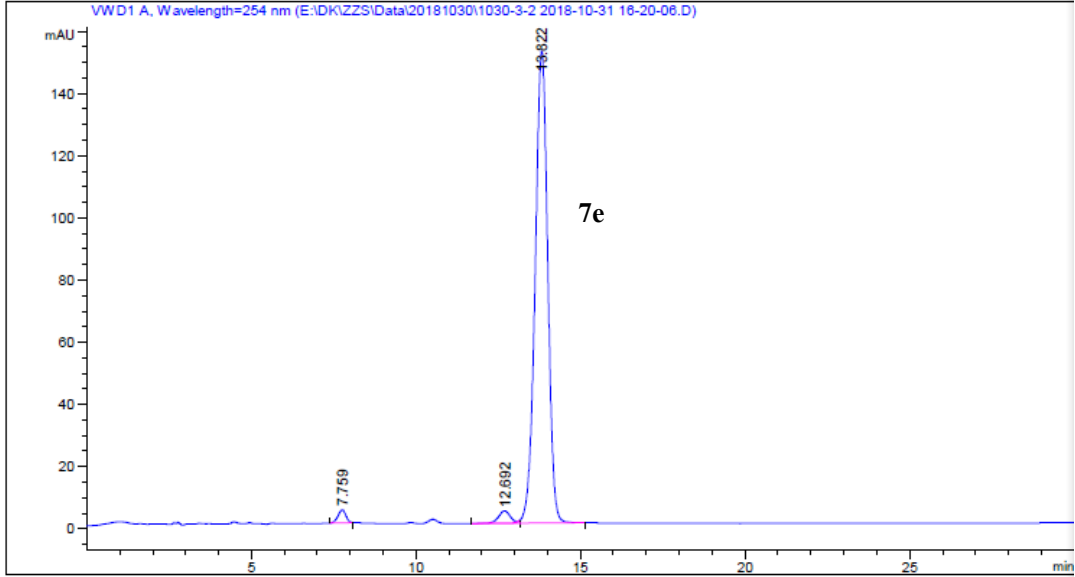

=====  
 Area Percent Report  
 =====

Sorted By : Signal  
 Multiplier : 2.0000  
 Dilution : 1.0000  
 Sample Amount : 50.00000 [ng/ul] (not used in calc.)  
 Use Multiplier & Dilution Factor with ISTDs

Signal 1: VWD1 A, Wavelength=254 nm

| Peak # | RetTime [min] | Type | Width [min] | Area [mAU*s] | Height [mAU] | Area %  |
|--------|---------------|------|-------------|--------------|--------------|---------|
| 1      | 7.759         | BB   | 0.2551      | 68.98974     | 4.16894      | 1.6405  |
| 2      | 12.692        | BV E | 0.3812      | 98.16505     | 3.96063      | 2.3343  |
| 3      | 13.822        | VB R | 0.4098      | 4038.17725   | 152.06833    | 96.0252 |

Totals : 4205.33204 160.19790



```

-----
Acq. Operator   : 系统
Sample Operator  : 系统
Acq. Instrument : 1260LC                      Location : 1
Injection Date  : 31/10/2018 16:52:33      Inj Volume : 30.000 µl

Acq. Method     : E:\DK\TL\方法\85C-15A-30min-1u.M
Last changed    : 31/10/2018 16:51:38 by 系统
                  (modified after loading)
Analysis Method : E:\DK\SJY\METHOD\XSXZ.M
Last changed    : 21/12/2018 18:12:24 by 系统
  
```

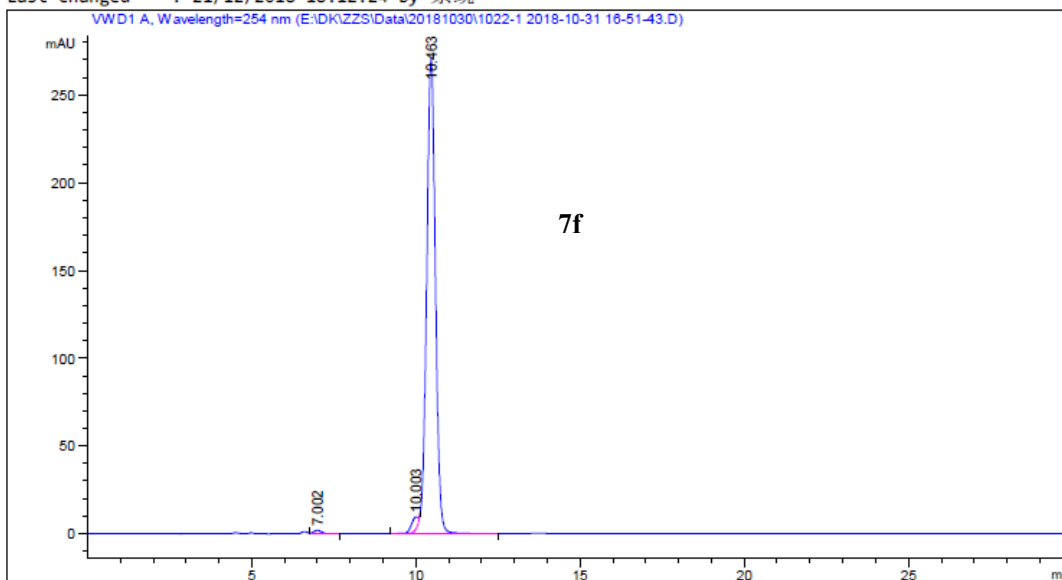

=====  
Area Percent Report  
=====

```

Sorted By      : Signal
Multiplier     : 2.0000
Dilution       : 1.0000
Sample Amount  : 50.00000 [ng/ul] (not used in calc.)
Use Multiplier & Dilution Factor with ISTDs
  
```

Signal 1: VWD1 A, Wavelength=254 nm

| Peak # | RetTime [min] | Type | Width [min] | Area [mAU*s] | Height [mAU] | Area %  |
|--------|---------------|------|-------------|--------------|--------------|---------|
| 1      | 7.002         | VB   | 0.2582      | 30.51808     | 1.84316      | 0.5839  |
| 2      | 10.003        | BV E | 0.2309      | 106.14196    | 6.80778      | 2.0309  |
| 3      | 10.463        | VB R | 0.2905      | 5089.73877   | 270.50864    | 97.3852 |

Totals :                    5226.39881 279.15957

Acq. Operator : 系统  
 Sample Operator : 系统  
 Acq. Instrument : 1260LC Location : 1  
 Injection Date : 06/01/2019 13:53:35 Inj Volume : 3.000 µl  
 Acq. Method : E:\DK\TL\方法\85C-15A-30min-1u.M  
 Last changed : 06/01/2019 13:52:49 by 系统  
 (modified after loading)  
 Analysis Method : E:\DK\SJY\METHOD\shuijiada.M  
 Last changed : 05/01/2019 11:20:17 by 系统

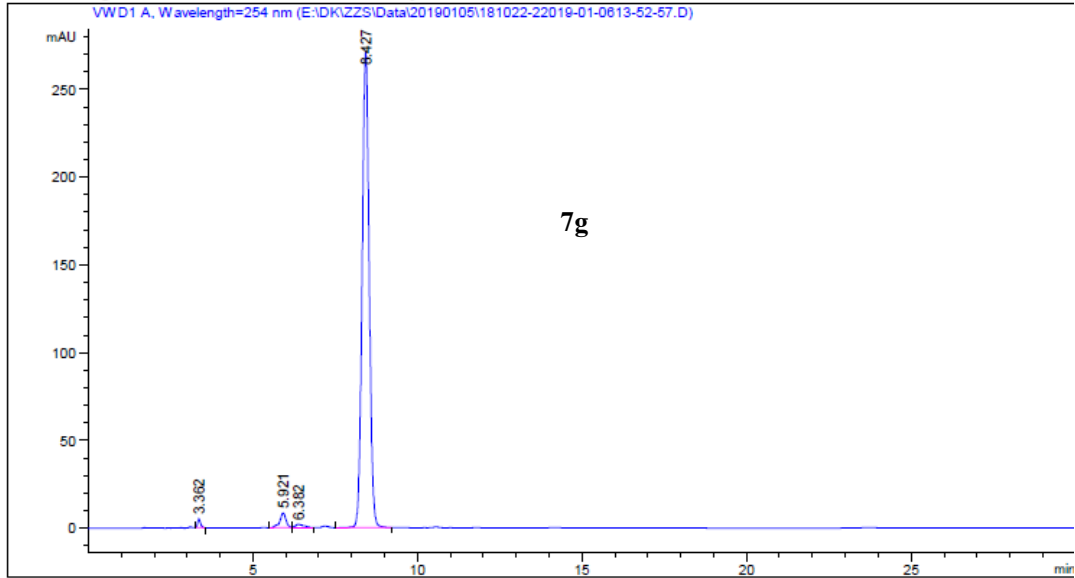

=====  
 Area Percent Report  
 =====

Sorted By : Signal  
 Multiplier : 2.0000  
 Dilution : 1.0000  
 Sample Amount : 30.00000 [ng/ul] (not used in calc.)  
 Use Multiplier & Dilution Factor with ISTDs

Signal 1: VWD1 A, Wavelength=254 nm

| Peak # | RetTime [min] | Type | Width [min] | Area [mAU*s] | Height [mAU] | Area %  |
|--------|---------------|------|-------------|--------------|--------------|---------|
| 1      | 3.362         | BB   | 0.0952      | 30.00751     | 4.84892      | 0.7082  |
| 2      | 5.921         | BV   | 0.1922      | 108.53032    | 8.37350      | 2.5615  |
| 3      | 6.382         | VB   | 0.2525      | 32.05448     | 1.76847      | 0.7565  |
| 4      | 8.427         | BB   | 0.2332      | 4066.38916   | 270.70895    | 95.9737 |

Totals : 4236.98147 285.69985

Acq. Operator : 系统  
 Sample Operator : 系统  
 Acq. Instrument : 1260LC Location : 1  
 Injection Date : 06/01/2019 12:59:09 Inj Volume : 2.000 µl  
 Acq. Method : E:\DK\TL\方法\85C-15A-30min-1u.M  
 Last changed : 06/01/2019 12:58:21 by 系统  
 (modified after loading)  
 Analysis Method : E:\DK\SJY\METHOD\shuijiada.M  
 Last changed : 05/01/2019 11:20:17 by 系统

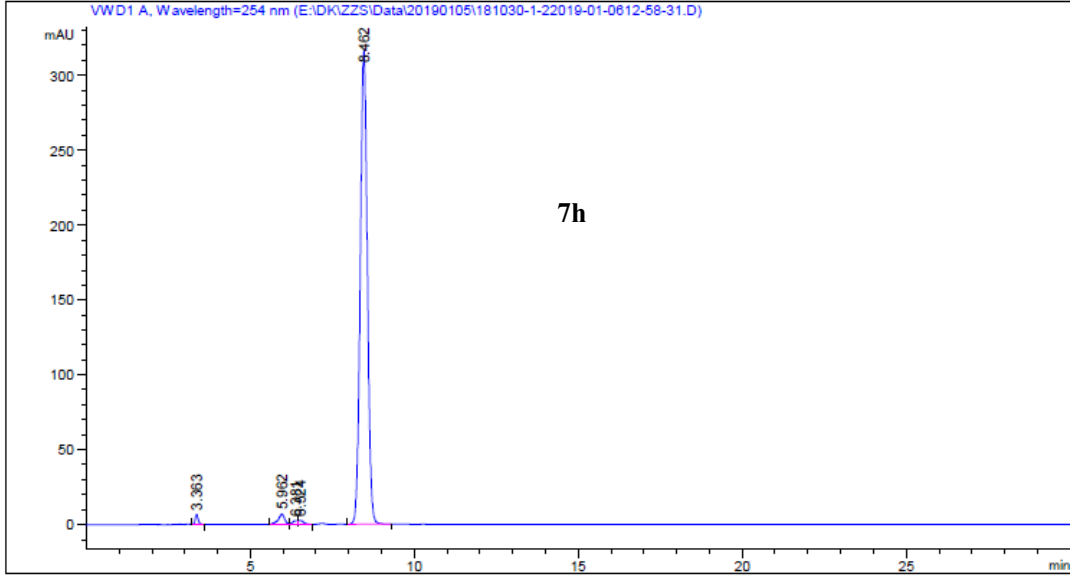

=====  
 Area Percent Report  
 =====

Sorted By : Signal  
 Multiplier : 2.0000  
 Dilution : 1.0000  
 Sample Amount: : 30.00000 [ng/ul] (not used in calc.)  
 Use Multiplier & Dilution Factor with ISTDs

Signal 1: VWD1 A, Wavelength=254 nm

| Peak # | RetTime [min] | Type | Width [min] | Area [mAU*s] | Height [mAU] | Area %  |
|--------|---------------|------|-------------|--------------|--------------|---------|
| 1      | 3.363         | BB   | 0.0960      | 41.48325     | 6.63238      | 0.8385  |
| 2      | 5.962         | BV   | 0.1992      | 92.26182     | 6.80352      | 1.8650  |
| 3      | 6.381         | VV   | 0.1477      | 22.24336     | 2.28322      | 0.4496  |
| 4      | 6.524         | VB   | 0.1785      | 29.92163     | 2.50253      | 0.6048  |
| 5      | 8.462         | BB   | 0.2336      | 4761.16748   | 316.34982    | 96.2420 |

Acq. Operator : 系统  
 Sample Operator : 系统  
 Acq. Instrument : 1260LC  
 Injection Date : 04/12/2018 16:07:15  
 Location : 1  
 Inj Volume : 20.000 µl  
 Acq. Method : E:\DK\TL\方法\90C-10D-30min-1u.M  
 Last changed : 04/12/2018 16:06:02 by 系统  
 (modified after loading)  
 Analysis Method : E:\DK\SJY\METHOD\XSSZ.M  
 Last changed : 21/12/2018 18:12:24 by 系统

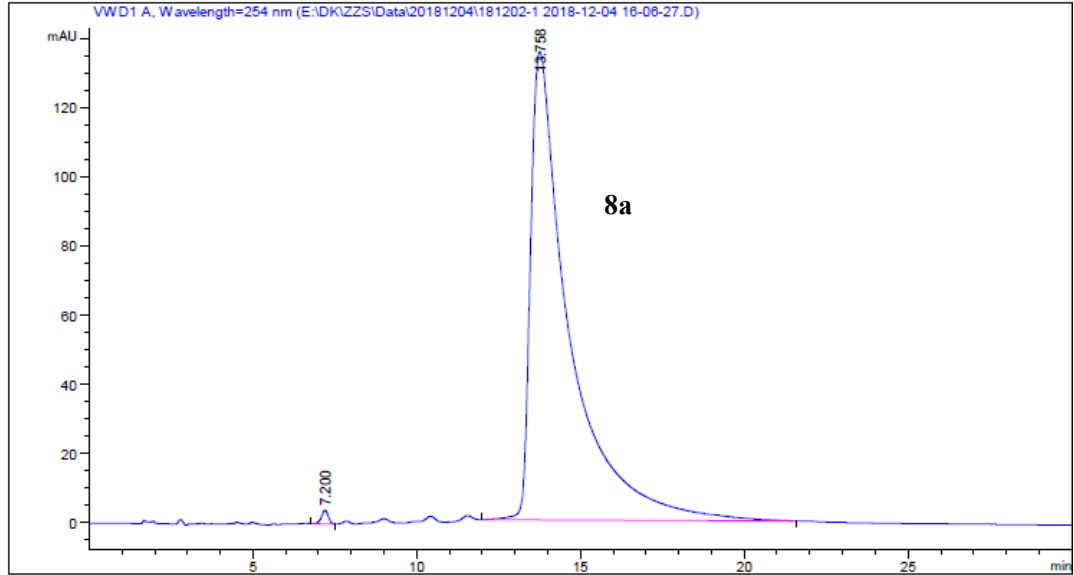

=====  
 Area Percent Report  
 =====

Sorted By : Signal  
 Multiplier : 2.0000  
 Dilution : 1.0000  
 Sample Amount: : 100.00000 [ng/ul] (not used in calc.)  
 Use Multiplier & Dilution Factor with ISTDs

Signal 1: VWD1 A, Wavelength=254 nm

| Peak # | RetTime [min] | Type | Width [min] | Area [mAU*s] | Height [mAU] | Area %  |
|--------|---------------|------|-------------|--------------|--------------|---------|
| 1      | 7.200         | BB   | 0.2251      | 58.05653     | 3.95913      | 0.5191  |
| 2      | 13.758        | BB   | 1.1390      | 1.11262e4    | 135.50314    | 99.4809 |

Totals :                    1.11843e4   139.46228

Acq. Operator : 系统  
 Sample Operator : 系统  
 Acq. Instrument : 1260LC Location : 1  
 Injection Date : 04/12/2018 18:21:58 Inj Volume : 30.000 µl  
 Acq. Method : E:\DK\TL\方法\90C-10D-30min-1u.M  
 Last changed : 04/12/2018 18:20:52 by 系统  
 (modified after loading)  
 Analysis Method : E:\DK\SJY\METHOD\XSXZ.M  
 Last changed : 21/12/2018 18:12:24 by 系统

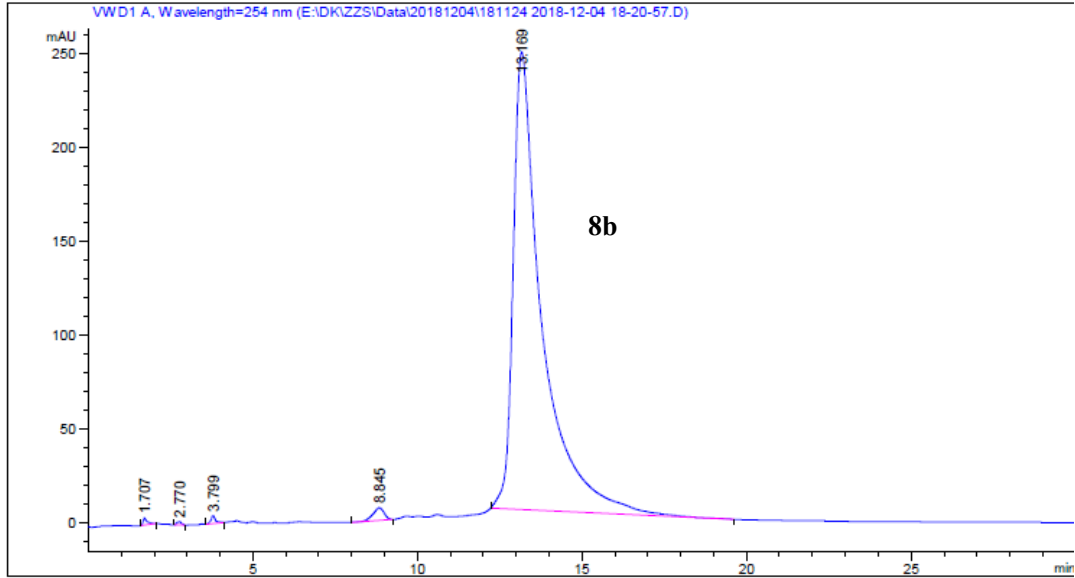

=====  
 Area Percent Report  
 =====

Sorted By : Signal  
 Multiplier : 2.0000  
 Dilution : 1.0000  
 Sample Amount: : 100.00000 [ng/ul] (not used in calc.)  
 Use Multiplier & Dilution Factor with ISTDs

Signal 1: VWD1 A, Wavelength=254 nm

| Peak # | RetTime [min] | Type | Width [min] | Area [mAU*s] | Height [mAU] | Area %  |
|--------|---------------|------|-------------|--------------|--------------|---------|
| 1      | 1.707         | BB   | 0.1331      | 36.19023     | 3.76690      | 0.2401  |
| 2      | 2.770         | BB   | 0.1362      | 18.62228     | 1.80722      | 0.1235  |
| 3      | 3.799         | BB   | 0.1455      | 42.28354     | 4.23525      | 0.2805  |
| 4      | 8.845         | BB   | 0.3492      | 156.73187    | 6.66848      | 1.0398  |
| 5      | 13.169        | BB   | 0.8325      | 1.48189e4    | 243.66263    | 98.3160 |

Acq. Operator : 系统  
 Sample Operator : 系统  
 Acq. Instrument : 1260LC Location : 1  
 Injection Date : 18/12/2018 16:10:42 Inj Volume : 10.000 µl  
 Acq. Method : E:\DK\TL\方法\90C-10A-30min-1u.M  
 Last changed : 18/12/2018 16:09:57 by 系统  
 (modified after loading)  
 Analysis Method : E:\DK\SJY\METHOD\XSXZ.M  
 Last changed : 21/12/2018 18:12:24 by 系统

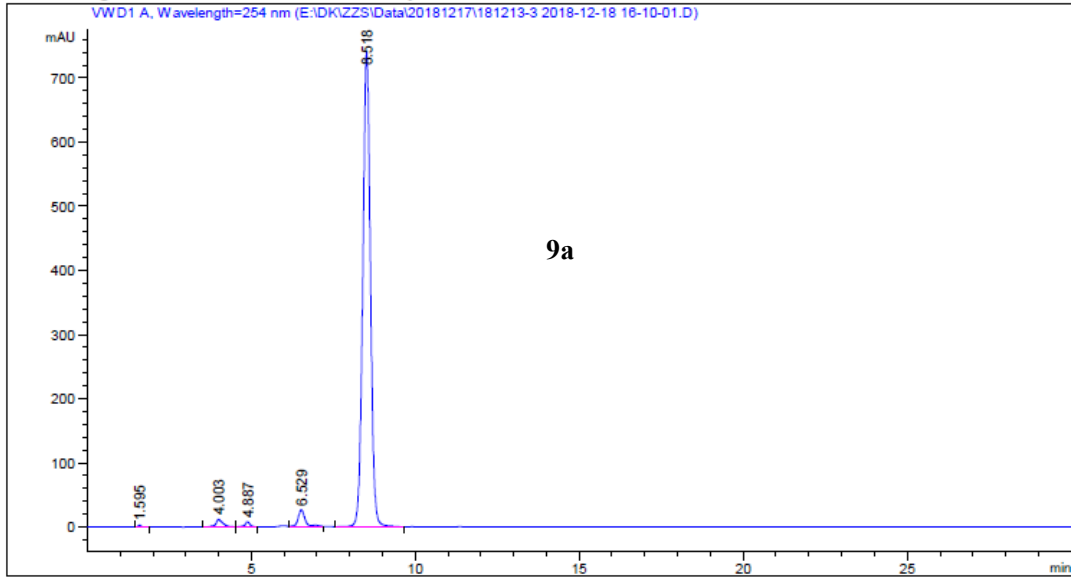

=====  
 Area Percent Report  
 =====

Sorted By : Signal  
 Multiplier : 2.0000  
 Dilution : 1.0000  
 Sample Amount: : 100.00000 [ng/ul] (not used in calc.)  
 Use Multiplier & Dilution Factor with ISTDs

Signal 1: VWD1 A, Wavelength=254 nm

| Peak # | RetTime [min] | Type | Width [min] | Area [mAU*s] | Height [mAU] | Area %  |
|--------|---------------|------|-------------|--------------|--------------|---------|
| 1      | 1.595         | BB   | 0.0743      | 17.24165     | 3.38976      | 0.1361  |
| 2      | 4.003         | BB   | 0.1917      | 170.35944    | 12.06598     | 1.3448  |
| 3      | 4.887         | BB   | 0.1498      | 80.00353     | 7.92377      | 0.6315  |
| 4      | 6.529         | BV R | 0.2118      | 354.70419    | 25.41198     | 2.7999  |
| 5      | 8.518         | BB   | 0.2523      | 1.20461e4    | 738.51459    | 95.0877 |

Acq. Operator : 系统  
 Sample Operator : 系统  
 Acq. Instrument : 1260LC Location : 1  
 Injection Date : 19/12/2018 14:52:43 Inj Volume : 10.000 µl  
 Acq. Method : E:\DK\TL\方法\90C-10A-30min-1u.M  
 Last changed : 19/12/2018 14:51:53 by 系统  
 (modified after loading)  
 Analysis Method : E:\DK\SJY\METHOD\XSXZ.M  
 Last changed : 21/12/2018 18:12:24 by 系统

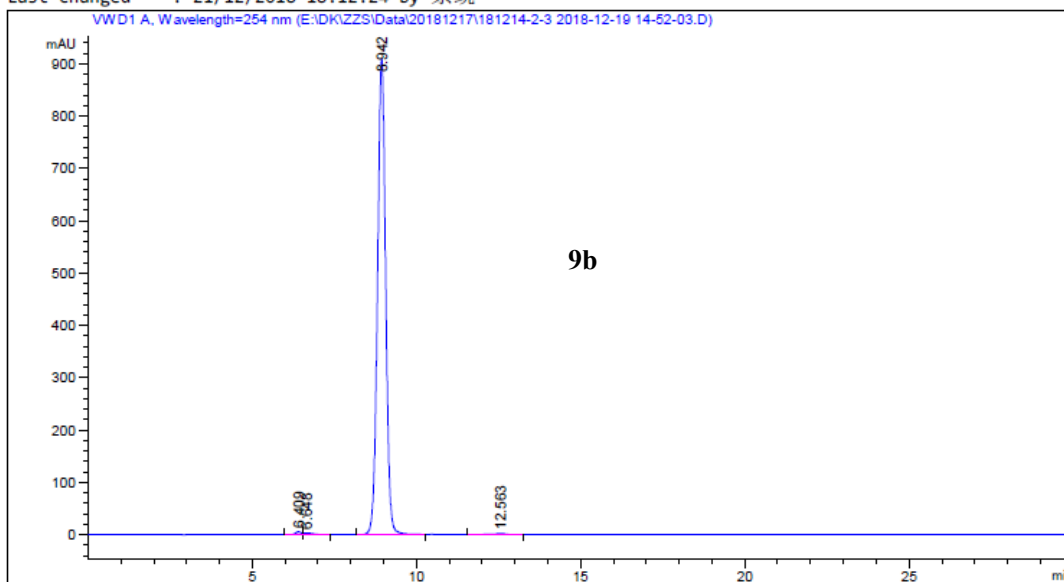

=====  
 Area Percent Report  
 =====

Sorted By : Signal  
 Multiplier : 2.0000  
 Dilution : 1.0000  
 Sample Amount : 100.00000 [ng/ul] (not used in calc.)  
 Use Multiplier & Dilution Factor with ISTDs

Signal 1: VWD1 A, Wavelength=254 nm

| Peak # | RetTime [min] | Type | Width [min] | Area [mAU*s] | Height [mAU] | Area %  |
|--------|---------------|------|-------------|--------------|--------------|---------|
| 1      | 6.409         | BV   | 0.2005      | 71.30328     | 5.31602      | 0.4513  |
| 2      | 6.648         | VB   | 0.2890      | 62.24963     | 3.09055      | 0.3940  |
| 3      | 8.942         | BB   | 0.2644      | 1.55988e4    | 908.14166    | 98.7362 |
| 4      | 12.563        | BB   | 0.4755      | 66.10728     | 1.95019      | 0.4184  |

Totals : 1.57985e4 918.49843
